# Supplementary material for: Novel Matrine Derivatives as Potential Larvicidal Agents against Aedes albopictus: Synthesis, Biological Evaluation, and Mechanistic Analysis
Source: MDPI journal article supplement (doi:10.3390/molecules28073035), 2023-03-29
Supplement: s1 [file s1]

# Novel matrine derivatives as potential larvicidal agents against *Aedes albopictus*: Synthesis, biological evaluation, and mechanistic analysis

Song Ang <sup>1,2,†</sup>, Jinfeng Liang <sup>1,2,†</sup>, Wende Zheng <sup>1,2</sup>, Zhen Zhang <sup>1,2</sup>, Jinxuan Li <sup>1,2</sup>, Zhenping Yan <sup>1,2</sup>, Wing-Leung Wong <sup>3</sup>, Kun Zhang <sup>1,2,\*</sup>, Min Chen <sup>1,2,\*</sup>, and Panpan Wu <sup>1,2,\*</sup>

<sup>1</sup> School of Biotechnology and Health Sciences, Wuyi University, Jiangmen, 529020, P. R. China

<sup>2</sup> International Healthcare Innovation Institute (Jiangmen), Jiangmen, 529040, P. R. China

<sup>3</sup> The State Key Laboratory of Chemical Biology and Drug Discovery, Department of Applied Biology and Chemical Technology, The Hong Kong Polytechnic University, Hung Hom, Kowloon, Hong Kong SAR, China

\* Correspondence: k Zhang@gdut.edu.cn (K.Z.); cmin0501@outlook.com (M.C.); wyuchemwpp@126.com (P.W.); Tel.: +86 13822330019 (K.Z.); +86 18312066545 (M.C.); +86 18825179347(P.W.)

† These authors contributed equally to this work.

Data for **4c** (C<sub>25</sub>H<sub>37</sub>ClN<sub>4</sub>O<sub>3</sub>S): yield: 42%; white powder; mp: 130.2-132.0 °C; <sup>1</sup>H NMR (500 MHz, Chloroform-*d*) δ<sub>H</sub> 7.83 – 7.77 (m, 2H), 7.51 – 7.45 (m, 2H), 3.72 – 3.61 (m, 2H), 3.60 – 3.50 (m, 3H), 3.51 – 3.44 (m, 2H), 3.18 (t, *J* = 11.8 Hz, 1H), 2.68 – 2.62 (m, 1H), 2.61 – 2.56 (m, 1H), 2.42 – 2.39 (m, 1H), 2.32 – 2.23 (m, 1H), 2.05 – 2.01 (m, 1H), 1.97 – 1.94 (m, 2H), 1.85 – 1.82 (m, 7H), 1.70 – 1.66 (m, 1H), 1.48 – 1.43 (m, 5H), 1.41 – 1.32 (m, 4H), 1.32 – 1.24 (m, 1H); <sup>13</sup>C NMR (126 MHz, Chloroform-*d*) δ<sub>C</sub> 171.62, 138.72, 138.66, 129.11, 129.05, 129.00, 62.89, 57.31, 57.25, 56.68, 56.64, 45.70, 45.26, 41.56, 41.29, 39.18, 34.47, 33.28, 27.86, 20.77, 20.69. HRMS (ESI): C<sub>25</sub>H<sub>38</sub>ClN<sub>4</sub>O<sub>3</sub>S (509.2348) [M+H]<sup>+</sup>= 509.2345.

Data for **4d** (C<sub>26</sub>H<sub>39</sub>ClN<sub>4</sub>O<sub>3</sub>S): yield: 81%; white powder; mp: 131.1-133.4 °C; <sup>1</sup>H NMR (500 MHz, Chloroform-*d*) δ<sub>H</sub> 7.79 (d, *J* = 8.7 Hz, 2H), 7.46 (d, *J* = 8.6 Hz, 2H), 3.70 – 3.62 (m, 1H), 3.62 – 3.55 (m, 1H), 3.55 – 3.43 (m, 4H), 3.17 (t, *J* = 11.6 Hz, 1H), 2.64 (d, *J* = 11.1 Hz, 1H), 2.57 (d, *J* = 11.3 Hz, 1H), 2.46 – 2.32 (m, 5H), 2.31 (s, 3H), 2.28 – 2.18 (m, 1H), 2.07 – 1.88 (m, 3H), 1.87 – 1.77 (m, 5H), 1.76 (d, *J* = 16.3 Hz, 1H), 1.70 – 1.61 (m, 1H), 1.51 – 1.42 (m, 1H), 1.41 – 1.37 (m, 2H), 1.45 – 1.31 (m, 3H), 1.34 – 1.23 (m, 1H); <sup>13</sup>C NMR (126 MHz, Chloroform-*d*) δ<sub>C</sub> 171.35, 138.64, 138.27, 129.09, 128.98, 62.91, 57.34, 56.68, 56.63, 55.12, 54.67, 47.49, 45.97, 45.39, 41.34, 39.18, 34.44, 33.33, 31.08, 27.88, 20.81, 20.73. HRMS (ESI): C<sub>26</sub>H<sub>40</sub>ClN<sub>4</sub>O<sub>3</sub>S (523.2504) [M+H]<sup>+</sup>=523.2497.

Data for **4e** (C<sub>25</sub>H<sub>34</sub>ClN<sub>3</sub>O<sub>4</sub>S<sub>2</sub>): yield: 75%; white powder; mp: 120.5-123.0 °C; <sup>1</sup>H NMR (500 MHz, Chloroform-*d*) δ<sub>H</sub> 7.91 – 7.73 (m, 2H), 7.55 – 7.44 (m, 2H), 6.13 (dd, *J* = 20.1, 6.6 Hz, 1H), 4.64 – 4.51 (m, 1H), 3.64 – 3.52 (m, 1H), 3.55 – 3.46 (m, 1H), 3.41 – 3.31 (m, 1H), 3.30 – 3.22 (m, 1H), 3.26 – 3.13 (m, 1H), 2.92 – 2.82 (m, 1H), 2.66 – 2.60 (m, 1H), 2.60 – 2.53 (m, 1H), 2.36 – 2.16 (m, 2H), 2.09 – 1.93 (m, 2H), 1.96 – 1.79 (m, 6H), 1.80 – 1.64 (m, 3H), 1.56 – 1.48 (m, 1H), 1.51 – 1.41 (m, 1H), 1.43 – 1.38 (m, 1H), 1.41 – 1.34 (m, 3H), 1.37 – 1.24 (m, 1H); <sup>13</sup>C NMR (126 MHz, Chloroform-*d*) δ<sub>C</sub> 205.43, 173.24, 138.73, 138.10, 129.15, 129.01, 62.86, 59.32, 57.54, 57.12, 56.63, 47.34, 39.34, 36.14, 34.32, 31.69, 30.93, 28.09, 27.89, 27.52, 21.47, 20.81, 20.71. HRMS (ESI): C<sub>25</sub>H<sub>35</sub>ClN<sub>3</sub>O<sub>4</sub>S<sub>2</sub> (540.1752) [M+H]<sup>+</sup>=540.1747.

Data for **4f** (C<sub>24</sub>H<sub>31</sub>ClN<sub>4</sub>O<sub>3</sub>S<sub>2</sub>): yield: 55%; white powder; mp: 156.9-158.5 °C;

$^1\text{H}$  NMR (500 MHz, Chloroform-*d*)  $\delta_{\text{H}}$  12.49 (d,  $J = 8.6$  Hz, 1H), 7.78 (d,  $J = 8.7$  Hz, 2H), 7.53 (d,  $J = 3.6$  Hz, 1H), 7.43 (d,  $J = 8.6$  Hz, 2H), 7.01 (d,  $J = 3.6$  Hz, 1H), 3.63 – 3.55 (m, 1H), 3.51 (dd,  $J = 12.3, 5.9$  Hz, 1H), 3.21 (dd,  $J = 12.4, 10.8$  Hz, 1H), 2.67 – 2.50 (m, 5H), 2.08 – 2.00 (m, 1H), 2.00 – 1.92 (m, 1H), 1.91 (dd,  $J = 10.3, 5.0$  Hz, 1H), 1.90 – 1.75 (m, 5H), 1.57 – 1.43 (m, 1H), 1.46 – 1.34 (m, 5H), 1.37 – 1.27 (m, 1H), 1.27 (d,  $J = 1.9$  Hz, 1H);  $^{13}\text{C}$  NMR (126 MHz, Chloroform-*d*)  $\delta_{\text{C}}$  171.03, 160.03, 138.64, 138.45, 136.48, 129.03, 128.94, 113.43, 62.78, 57.19, 56.63, 47.24, 39.33, 35.87, 34.39, 31.09, 28.08, 27.89, 20.84, 20.72, 20.60. HRMS (ESI):  $\text{C}_{24}\text{H}_{32}\text{ClN}_4\text{O}_3\text{S}_2$  (523.1599)  $[\text{M}+\text{H}]^+=523.1606$ .

Data for **4g** ( $\text{C}_{31}\text{H}_{47}\text{ClN}_4\text{O}_3\text{S}$ ): yield: 84%; white powder; mp: 214.4-215.5 °C;  $^1\text{H}$  NMR (500 MHz, Chloroform-*d*)  $\delta_{\text{H}}$  7.80 (dd,  $J = 8.7, 2.3$  Hz, 2H), 7.46 (dd,  $J = 8.6, 2.0$  Hz, 2H), 4.70 – 4.63 (m, 1H), 3.97 – 3.88 (m, 1H), 3.55 – 3.46 (m, 2H), 3.17 (t,  $J = 11.6$  Hz, 1H), 3.03 – 2.93 (m, 1H), 2.63 (d,  $J = 11.3$  Hz, 1H), 2.60 – 2.52 (m, 1H), 2.52 (t,  $J = 5.1$  Hz, 5H), 2.52 – 2.45 (m, 1H), 2.40 – 2.31 (m, 1H), 2.30 – 2.20 (m, 1H), 2.01 (t,  $J = 2.9$  Hz, 1H), 2.00 – 1.93 (m, 1H), 1.93 – 1.89 (m, 1H), 1.92 – 1.71 (m, 8H), 1.68 – 1.51 (m, 6H), 1.52 – 1.24 (m, 10H);  $^{13}\text{C}$  NMR (126 MHz, Chloroform-*d*)  $\delta_{\text{C}}$  171.10, 138.62, 138.30, 129.12, 128.95, 62.84, 62.69, 57.33, 56.69, 50.16, 47.39, 45.20, 41.27, 39.19, 34.41, 33.42, 31.26, 28.62, 28.52, 27.98, 27.90, 27.54, 27.45, 26.06, 24.54, 20.86, 20.76. HRMS (ESI):  $\text{C}_{31}\text{H}_{48}\text{ClN}_4\text{O}_3\text{S}$  (591.3130)  $[\text{M}+\text{H}]^+=591.3120$ .

Data for **4h** ( $\text{C}_{31}\text{H}_{41}\text{ClN}_4\text{O}_3\text{S}$ ): yield: 56%; white powder; mp: 170.6-172.1 °C;  $^1\text{H}$  NMR (500 MHz, Chloroform-*d*)  $\delta_{\text{H}}$  7.85 – 7.78 (m, 2H), 7.51 – 7.45 (m, 2H), 7.30 (dd,  $J = 8.9, 7.4$  Hz, 2H), 6.95 (d,  $J = 8.2$  Hz, 2H), 6.91 (d,  $J = 7.3$  Hz, 1H), 3.86 – 3.78 (m, 1H), 3.78 – 3.72 (m, 1H), 3.72 – 3.60 (m, 2H), 3.57 – 3.49 (m, 2H), 3.25 – 3.10 (m, 3H), 3.17 (s, 1H), 2.65 (dd,  $J = 11.6, 3.5$  Hz, 1H), 2.62 – 2.55 (m, 1H), 2.49 – 2.40 (m, 1H), 2.35 – 2.25 (m, 1H), 2.06 – 1.91 (m, 3H), 1.90 – 1.76 (m, 5H), 1.76 – 1.67 (m, 1H), 1.58 – 1.51 (m, 1H), 1.54 – 1.43 (m, 1H), 1.46 – 1.40 (m, 1H), 1.40 (d,  $J = 4.1$  Hz, 2H), 1.37 (d,  $J = 2.6$  Hz, 1H), 1.35 (d,  $J = 7.0$  Hz, 1H), 1.29 (d,  $J = 15.1$  Hz, 2H);  $^{13}\text{C}$  NMR (126 MHz, Chloroform-*d*)  $\delta_{\text{C}}$  171.47, 151.00, 138.68, 138.19, 129.25, 129.13, 129.00, 120.46, 116.63, 62.86, 57.32, 56.71, 56.66, 49.83, 49.39,

47.48, 45.55, 41.46, 39.20, 34.43, 33.46, 31.15, 27.95, 27.91, 20.88, 20.84, 20.79.  
HRMS (ESI): C<sub>31</sub>H<sub>41</sub>ClN<sub>4</sub>O<sub>3</sub>S (585.2660) [M+H]<sup>+</sup>= 585.2668.

Data for **4i** (C<sub>25</sub>H<sub>36</sub>BrN<sub>3</sub>O<sub>3</sub>S): yield: 66%; white powder; mp: 161.5-163.5 °C; <sup>1</sup>H NMR (500 MHz, Chloroform-*d*) δ<sub>H</sub> 7.78 – 7.71 (m, 2H), 7.66 – 7.60 (m, 2H), 3.58 – 3.47 (m, 2H), 3.46 (t, *J* = 6.9 Hz, 2H), 3.45 – 3.35 (m, 2H), 3.20 (dd, *J* = 12.2, 10.9 Hz, 1H), 2.67 – 2.60 (m, 1H), 2.61 – 2.55 (m, 1H), 2.32 – 2.23 (m, 1H), 2.22 – 2.13 (m, 1H), 2.02 (t, *J* = 3.1 Hz, 1H), 2.01 – 1.72 (m, 11H), 1.72 – 1.60 (m, 1H), 1.58 – 1.48 (m, 1H), 1.51 – 1.25 (m, 7H); <sup>13</sup>C NMR (126 MHz, Chloroform-*d*) δ<sub>C</sub> 171.39, 139.04, 131.88, 129.22, 127.00, 62.84, 57.42, 56.70, 56.66, 47.25, 46.60, 45.60, 39.19, 34.68, 34.41, 31.39, 28.08, 27.94, 26.15, 24.44, 20.87, 20.77, 20.45. HRMS (ESI): C<sub>25</sub>H<sub>37</sub>BrN<sub>3</sub>O<sub>3</sub>S (538.1734) [M+H]<sup>+</sup>=538.1743.

Data for **4j** (C<sub>25</sub>H<sub>36</sub>BrN<sub>3</sub>O<sub>4</sub>S): yield: 64%; white powder; mp: 149.5-151.9 °C; <sup>1</sup>H NMR (500 MHz, Chloroform-*d*) δ<sub>H</sub> 7.76 – 7.70 (m, 2H), 7.67 – 7.61 (m, 2H), 3.74 – 3.65 (m, 4H), 3.68 – 3.62 (m, 1H), 3.65 – 3.55 (m, 1H), 3.55 – 3.44 (m, 4H), 3.17 (dd, *J* = 12.1, 11.1 Hz, 1H), 2.68 – 2.61 (m, 1H), 2.61 – 2.54 (m, 1H), 2.43 – 2.33 (m, 1H), 2.29 – 2.20 (m, 1H), 2.03 (t, *J* = 3.1 Hz, 1H), 2.01 – 1.89 (m, 2H), 1.89 – 1.75 (m, 6H), 1.75 – 1.62 (m, 3H), 1.57 – 1.48 (m, 1H), 1.51 – 1.40 (m, 1H), 1.44 – 1.32 (m, 3H); <sup>13</sup>C NMR (126 MHz, Chloroform-*d*) δ<sub>C</sub> 171.59, 138.69, 131.97, 129.23, 127.15, 66.91, 66.75, 62.83, 57.29, 56.69, 56.65, 47.44, 46.03, 41.87, 39.19, 34.42, 33.23, 31.10, 27.94, 27.90, 20.86, 20.77, 20.72. HRMS (ESI): C<sub>25</sub>H<sub>37</sub>BrN<sub>3</sub>O<sub>4</sub>S (554.1682) [M+H]<sup>+</sup>=554.1689.

Data for **4k** (C<sub>25</sub>H<sub>37</sub>BrN<sub>4</sub>O<sub>3</sub>S): yield: 35%; white powder; mp: 133.4-135.7 °C; <sup>1</sup>H NMR (500 MHz, Chloroform-*d*) δ<sub>H</sub> 7.76 – 7.70 (m, 2H), 7.68 – 7.61 (m, 2H), 3.64 (t, *J* = 5.4 Hz, 1H), 3.60 – 3.44 (m, 6H), 3.18 (t, *J* = 11.6 Hz, 1H), 2.65 (d, *J* = 11.8 Hz, 1H), 2.59 (dd, *J* = 11.7, 3.4 Hz, 1H), 2.41 – 2.38 (m, 1H), 2.31 – 2.21 (m, 1H), 2.08 – 2.00 (m, 2H), 2.00 – 1.91 (m, 3H), 1.89 – 1.75 (m, 8H), 1.69 – 1.66 (m, 1H), 1.57 – 1.45 (m, 1H), 1.48 – 1.40 (m, 1H), 1.42 – 1.31 (m, 4H), 1.31 – 1.24 (m, 1H); <sup>13</sup>C NMR (126 MHz, Chloroform-*d*) δ<sub>C</sub> 171.61, 138.80, 132.02, 131.97, 129.23, 127.13, 62.86, 57.33, 56.65, 47.48, 45.72, 45.26, 41.56, 39.19, 34.48, 33.30, 30.97, 27.89, 20.86, 20.78, 20.70. HRMS (ESI): C<sub>25</sub>H<sub>38</sub>BrN<sub>4</sub>O<sub>3</sub>S (553.1843) [M+H]<sup>+</sup>=553.1845.

Data for **4l** (C<sub>26</sub>H<sub>39</sub>BrN<sub>4</sub>O<sub>3</sub>S): yield: 70%; white powder; mp: 134.9-136.3 °C; <sup>1</sup>H NMR (500 MHz, Chloroform-*d*) δ<sub>H</sub> 7.73 (d, *J* = 8.9 Hz, 2H), 7.63 (d, *J* = 8.4 Hz, 2H), 3.71 – 3.63 (m, 1H), 3.63 – 3.56 (m, 1H), 3.56 – 3.39 (m, 5H), 3.18 (t, *J* = 11.6 Hz, 1H), 2.64 (d, *J* = 11.0 Hz, 1H), 2.58 (d, *J* = 11.5 Hz, 1H), 2.46 – 2.32 (m, 4H), 2.31 (s, 3H), 2.28 – 2.18 (m, 1H), 2.04 – 1.95 (m, 2H), 1.97 – 1.88 (m, 1H), 1.88 – 1.72 (m, 7H), 1.70 – 1.51 (m, 2H), 1.52 – 1.43 (m, 1H), 1.43 – 1.36 (m, 2H), 1.38 – 1.33 (m, 1H), 1.36 – 1.24 (m, 1H); <sup>13</sup>C NMR (126 MHz, Chloroform-*d*) δ<sub>C</sub> 171.34, 138.79, 131.96, 129.20, 127.12, 62.88, 57.35, 56.69, 56.64, 55.12, 54.67, 47.48, 45.96, 45.38, 41.33, 39.18, 34.45, 33.34, 31.10, 27.88, 20.80, 20.75. HRMS (ESI): C<sub>26</sub>H<sub>40</sub>BrN<sub>4</sub>O<sub>3</sub>S (567.1999) [M+H]<sup>+</sup>=567.2003.

Data for **4m** (C<sub>25</sub>H<sub>34</sub>BrN<sub>3</sub>O<sub>4</sub>S<sub>2</sub>): yield: 51%; white powder; mp: 122.2-124.1 °C; <sup>1</sup>H NMR (500 MHz, Chloroform-*d*) δ<sub>H</sub> 7.80 – 7.71 (m, 2H), 7.70 – 7.61 (m, 2H), 6.13 (dd, *J* = 18.7, 6.6 Hz, 1H), 4.64 – 4.51 (m, 1H), 3.78 (d, *J* = 1.2 Hz, 0H), 3.64 – 3.45 (m, 1H), 3.54 (s, 1H), 3.41 – 3.31 (m, 1H), 3.30 – 3.22 (m, 1H), 3.24 – 3.13 (m, 1H), 2.92 – 2.82 (m, 1H), 2.63 (d, *J* = 11.2 Hz, 1H), 2.56 (s, 1H), 2.36 – 2.10 (m, 2H), 2.09 – 1.93 (m, 2H), 1.84 (q, *J* = 7.7 Hz, 1H), 1.81 (s, 6H), 1.79 (s, 1H), 1.73 – 1.60 (m, 1H), 1.52 – 1.39 (m, 1H), 1.42 – 1.30 (m, 4H), 1.33 – 1.24 (m, 1H); <sup>13</sup>C NMR (126 MHz, Chloroform-*d*) δ<sub>C</sub> 205.43, 173.22, 139.26, 131.99, 131.95, 129.25, 129.21, 127.22, 62.78, 59.33, 57.55, 57.14, 56.63, 47.27, 39.34, 36.07, 34.34, 31.70, 30.88, 28.03, 27.88, 27.51, 20.81, 20.70. HRMS (ESI): C<sub>25</sub>H<sub>35</sub>BrN<sub>3</sub>O<sub>4</sub>S<sub>2</sub> (584.1247) [M+H]<sup>+</sup>=584.1240.

Data for **4n** (C<sub>24</sub>H<sub>31</sub>BrN<sub>4</sub>O<sub>3</sub>S<sub>2</sub>): yield: 38%; white powder; mp: 157.6-159.3 °C; <sup>1</sup>H NMR (500 MHz, Chloroform-*d*) δ<sub>H</sub> 12.42 (s, 1H), 7.74 – 7.68 (m, 2H), 7.62 – 7.56 (m, 2H), 7.53 (d, *J* = 3.6 Hz, 1H), 7.01 (d, *J* = 3.6 Hz, 1H), 3.59 (dd, *J* = 8.9, 5.0 Hz, 1H), 3.51 (dd, *J* = 12.4, 5.8 Hz, 1H), 3.21 (t, *J* = 11.6 Hz, 1H), 2.67 – 2.59 (m, 2H), 2.59 – 2.50 (m, 2H), 2.08 – 1.96 (m, 2H), 1.99 – 1.90 (m, 1H), 1.92 – 1.82 (m, 1H), 1.85 – 1.77 (m, 3H), 1.57 – 1.44 (m, 1H), 1.47 – 1.36 (m, 2H), 1.39 (s, 3H), 1.38 – 1.34 (m, 1H), 1.36 – 1.24 (m, 3H); <sup>13</sup>C NMR (126 MHz, Chloroform-*d*) δ<sub>C</sub> 171.01, 159.96, 138.99, 136.51, 131.93, 129.12, 127.14, 113.43, 62.79, 57.20, 56.62, 47.26,

39.34, 35.86, 34.41, 31.06, 29.72, 28.06, 27.87, 20.82, 20.71, 20.62. HRMS (ESI):  $C_{24}H_{32}BrN_4O_3S_2$  (567.1094)  $[M+H]^+ = 567.1102$ .

Data for **4o** ( $C_{31}H_{47}BrN_4O_3S$ ): yield: 51%; white powder; mp: 214.2-216.0 °C;  $^1H$  NMR (500 MHz, Chloroform-*d*)  $\delta_H$  7.80 – 7.69 (m, 2H), 7.66 – 7.59 (m, 2H), 4.75 – 4.66 (m, 1H), 3.99 – 3.91 (m, 1H), 3.54 – 3.39 (m, 2H), 3.21 – 3.12 (m, 1H), 3.05 – 2.94 (m, 2H), 2.85 – 2.76 (m, 1H), 2.72 – 2.65 (m, 4H), 2.65 (d,  $J = 11.2$  Hz, 1H), 2.59 (d,  $J = 11.6$  Hz, 1H), 2.56 – 2.46 (m, 1H), 2.41 – 2.18 (m, 1H), 2.07 – 2.01 (m, 1H), 2.00 (s, 2H), 1.98 – 1.88 (m, 2H), 1.90 – 1.75 (m, 3H), 1.78 – 1.67 (m, 2H), 1.70 – 1.57 (m, 1H), 1.57 – 1.51 (m, 1H), 1.51 – 1.48 (m, 1H), 1.48 (s, 4H), 1.48 – 1.36 (m, 2H), 1.36 – 1.21 (m, 8H);  $^{13}C$  NMR (126 MHz, Chloroform-*d*)  $\delta_C$  171.16, 138.78, 131.99, 129.24, 127.16, 62.88, 62.52, 58.30, 57.32, 56.61, 49.65, 47.47, 45.02, 41.03, 39.16, 34.42, 33.38, 31.02, 29.70, 27.91, 27.86, 27.79, 26.76, 24.97, 23.96, 23.00, 20.76, 8.85, 8.24. HRMS (ESI):  $C_{31}H_{48}BrN_4O_3S$  (635.2625)  $[M+H]^+ = 635.2631$ .

Data for **4p** ( $C_{31}H_{41}BrN_4O_3S$ ): yield: 49%; white powder; mp: 156.8-158.9 °C;  $^1H$  NMR (500 MHz, Chloroform-*d*)  $\delta_H$  7.77 – 7.71 (m, 2H), 7.67 – 7.61 (m, 2H), 7.34 – 7.27 (m, 2H), 6.96 (d,  $J = 1.2$  Hz, 1H), 6.97 – 6.88 (m, 2H), 3.86 – 3.78 (m, 1H), 3.78 – 3.71 (m, 1H), 3.71 – 3.60 (m, 2H), 3.57 – 3.48 (m, 2H), 3.25 – 3.10 (m, 5H), 2.69 – 2.62 (m, 1H), 2.62 – 2.55 (m, 1H), 2.49 – 2.39 (m, 1H), 2.34 – 2.25 (m, 1H), 2.03 (t,  $J = 3.1$  Hz, 1H), 2.01 – 1.91 (m, 2H), 1.89 – 1.76 (m, 6H), 1.75 – 1.66 (m, 1H), 1.58 – 1.48 (m, 1H), 1.51 – 1.43 (m, 1H), 1.45 – 1.38 (m, 2H), 1.37 (s, 1H), 1.37 – 1.29 (m, 1H), 1.29 – 1.26 (m, 1H);  $^{13}C$  NMR (126 MHz, Chloroform-*d*)  $\delta_C$  171.45, 151.00, 138.74, 131.98, 129.25, 129.23, 127.15, 120.46, 116.63, 62.86, 57.34, 56.71, 56.66, 49.83, 49.39, 47.49, 45.55, 41.46, 39.20, 34.44, 33.45, 31.14, 27.95, 27.91, 20.88, 20.84, 20.79. HRMS (ESI):  $C_{31}H_{42}BrN_4O_3S$  (629.2156)  $[M+H]^+ = 629.2160$ .

Data for **5c** ( $C_{25}H_{37}ClN_4O_4S$ ): yield: 63%; white powder; mp: 160.7-162.5 °C;  $^1H$  NMR (500 MHz, Chloroform-*d*)  $\delta_H$  7.80 – 7.73 (m, 2H), 7.55 – 7.46 (m, 2H), 4.74 – 4.71 (m, 1H), 4.37 – 4.34 (m, 1H), 3.65 – 3.51 (m, 3H), 3.50 – 3.39 (m, 2H), 3.25 (s, 1H), 3.23 – 3.18 (m, 5H), 2.90 – 2.78 (m, 3H), 2.56 (s, 1H), 2.40 (dd,  $J = 28.4, 15.4$  Hz, 1H), 2.33 – 2.20 (m, 2H), 2.23 – 2.07 (m, 3H), 2.02 – 1.91 (m, 1H), 1.83 – 1.70 (m, 3H), 1.63 – 1.50 (m, 5H), 1.32 – 1.19 (m, 1H);  $^{13}C$  NMR (126 MHz,

Chloroform-*d*)  $\delta_C$  171.26, 138.84, 138.70, 129.32, 128.58, 69.02, 68.52, 67.18, 56.67, 49.63, 46.39, 46.06, 45.59, 42.26, 38.49, 34.55, 33.00, 29.66, 25.74, 25.03, 20.07, 17.18, 17.09. HRMS (ESI):  $C_{25}H_{38}ClN_4O_4S$  (525.2297)  $[M+H]^+=525.2291$ .

Data for **5d** ( $C_{26}H_{39}ClN_4O_4S$ ): yield: 95%; light brown powder; mp: 164.4-166.9 °C;  $^1H$  NMR (500 MHz, Chloroform-*d*)  $\delta_H$  7.79 – 7.72 (m, 2H), 7.53 – 7.45 (m, 2H), 4.65 – 4.61 (m, 1H), 4.29 – 4.26 (m, 1H), 3.66 – 3.52 (m, 3H), 3.50 – 3.38 (m, 2H), 3.31 – 3.27 (m, 1H), 3.25 – 3.22 (m, 4H), 3.27 – 3.18 (m, 1H), 2.50 (d,  $J = 11.5$  Hz, 1H), 2.42 – 2.33 (m, 5H), 2.33 (d,  $J = 5.7$  Hz, 1H), 2.29 (s, 3H), 2.28 – 2.18 (m, 2H), 2.17 – 2.12 (m, 1H), 2.14 – 2.05 (m, 2H), 1.99 – 1.89 (m, 1H), 1.84 – 1.68 (m, 3H), 1.60 – 1.45 (m, 1H), 1.26 – 1.23 (m, 1H), 1.16 – 1.07 (m, 1H);  $^{13}C$  NMR (126 MHz, Chloroform-*d*)  $\delta_C$  171.11, 138.84, 138.72, 129.31, 128.54, 67.20, 56.63, 55.14, 54.70, 49.43, 46.03, 45.35, 44.55, 41.41, 38.36, 34.38, 32.97, 29.79, 25.60, 24.91, 20.03, 17.13, 17.04. HRMS (ESI):  $C_{26}H_{40}ClN_4O_4S$  (539.2453)  $[M+H]^+=539.2444$ .

Data for **5e** ( $C_{25}H_{34}ClN_3O_5S_2$ ): yield: 99%; white powder; mp: 153.4-155.3 °C;  $^1H$  NMR (500 MHz, Chloroform-*d*)  $\delta_H$  7.79 – 7.72 (m, 2H), 7.52 – 7.45 (m, 2H), 5.06 (s, 1H), 4.46 – 4.36 (m, 1H), 3.78 – 3.63 (m, 1H), 3.42 (s, 1H), 3.40 – 3.29 (m, 1H), 3.28 – 3.21 (m, 1H), 3.16 (dd,  $J = 25.2, 6.0$  Hz, 1H), 3.14 – 3.03 (m, 2H), 2.80 – 2.69 (m, 1H), 2.67 – 2.56 (m, 1H), 2.52 – 2.40 (m, 1H), 2.37 – 2.28 (m, 2H), 2.27 (s, 1H), 2.26 – 1.97 (m, 3H), 1.95 – 1.82 (m, 3H), 1.82 – 1.70 (m, 2H), 1.60 (d,  $J = 16.3$  Hz, 1H), 1.58 – 1.50 (m, 4H), 1.52 – 1.37 (m, 0H), 1.32 – 1.23 (m, 1H), 1.22 – 1.10 (m, 1H);  $^{13}C$  NMR (126 MHz, Chloroform-*d*)  $\delta_C$  205.12, 176.29, 173.37, 139.71, 138.86, 129.30, 128.42, 128.39, 68.51, 68.28, 59.20, 58.89, 56.62, 44.81, 39.18, 35.02, 31.31, 31.22, 27.38, 25.64, 25.20, 22.84, 20.99, 20.73, 17.05. HRMS (ESI):  $C_{25}H_{35}ClN_3O_5S_2$  (556.1701)  $[M+H]^+=556.1694$ .

Data for **5f** ( $C_{24}H_{31}ClN_4O_4S_2$ ): yield: 39%; white powder; mp: 178.8-180.6 °C;  $^1H$  NMR (500 MHz, Chloroform-*d*)  $\delta_H$  7.77 – 7.69 (m, 2H), 7.48 – 7.42 (m, 3H), 6.96 (d,  $J = 3.6$  Hz, 1H), 4.83 (s, 1H), 4.27 – 4.18 (m, 1H), 3.77 – 3.59 (m, 3H), 3.22 (s, 1H), 3.17 – 3.06 (m, 4H), 2.59 – 2.44 (m, 1H), 2.37 – 2.30 (m, 2H), 2.10 – 2.04 (m, 1H), 1.96 – 1.85 (m, 1H), 1.81 – 1.74 (m, 2H), 1.67 – 1.61 (m, 2H), 1.40 (t,  $J = 7.3$  Hz,

4H), 1.27 – 1.25 (m, 2H);  $^{13}\text{C}$  NMR (126 MHz, Deuterium Oxide)  $\delta_{\text{C}}$  173.83, 160.97, 139.64, 134.34, 129.41, 128.82, 126.83, 115.04, 67.25, 66.27, 65.89, 54.84, 46.48, 35.61, 35.02, 31.31, 30.97, 23.60, 23.51, 18.22, 15.81, 15.77. HRMS (ESI):  $\text{C}_{24}\text{H}_{32}\text{ClN}_4\text{O}_4\text{S}_2$  (539.1548)  $[\text{M}+\text{H}]^+=539.1541$ .

Data for **5g** ( $\text{C}_{31}\text{H}_{47}\text{ClN}_4\text{O}_4\text{S}$ ): yield: 75%; white powder; mp: 217.6-219.0 °C;  $^1\text{H}$  NMR (500 MHz, Chloroform-*d*)  $\delta_{\text{H}}$  7.80 – 7.74 (m, 2H), 7.51 – 7.45 (m, 2H), 4.95 – 4.88 (m, 1H), 4.68 – 4.54 (m, 2H), 3.96 – 3.88 (m, 1H), 3.67 – 3.59 (m, 1H), 3.07 (d,  $J = 6.8$  Hz, 6H), 3.00 – 2.91 (m, 1H), 2.70 – 2.59 (m, 1H), 2.54 – 2.39 (m, 9H), 2.39 – 2.31 (m, 1H), 2.25 – 2.07 (m, 5H), 2.03 – 1.91 (m, 1H), 1.91 – 1.79 (m, 1H), 1.77 (s, 1H), 1.77 – 1.66 (m, 2H), 1.66 – 1.53 (m, 5H), 1.56 – 1.45 (m, 2H), 1.48 – 1.32 (m, 3H);  $^{13}\text{C}$  NMR (126 MHz, Chloroform-*d*)  $\delta_{\text{C}}$  171.14, 138.76, 138.55, 129.29, 128.61, 69.78, 69.23, 66.87, 62.61, 56.69, 50.26, 45.23, 41.35, 38.78, 38.75, 35.00, 33.25, 29.48, 29.41, 28.89, 28.74, 27.79, 26.36, 26.11, 25.28, 24.73, 20.02, 17.26, 17.18. HRMS (ESI):  $\text{C}_{31}\text{H}_{48}\text{ClN}_4\text{O}_4\text{S}$  (607.3079)  $[\text{M}+\text{H}]^+=607.3070$ .

Data for **5h** ( $\text{C}_{31}\text{H}_{41}\text{ClN}_4\text{O}_4\text{S}$ ): yield: 98%; white powder; mp: 183.3~185.9 °C;  $^1\text{H}$  NMR (500 MHz, Chloroform-*d*)  $\delta_{\text{H}}$  7.80 – 7.73 (m, 2H), 7.54 – 7.46 (m, 2H), 7.34 – 7.25 (m, 2H), 6.96 (d,  $J = 1.2$  Hz, 1H), 6.97 – 6.87 (m, 2H), 4.50 (d,  $J = 10.6$  Hz, 1H), 4.23 (t,  $J = 12.0$  Hz, 1H), 3.85 – 3.77 (m, 1H), 3.77 – 3.66 (m, 1H), 3.69 – 3.59 (m, 4H), 3.26 – 3.19 (m, 1H), 3.19 (s, 2H), 3.19 – 3.12 (m, 1H), 3.14 – 3.02 (m, 3H), 2.46 – 2.34 (m, 2H), 2.29 – 2.19 (m, 2H), 2.19 – 2.12 (m, 2H), 2.12 – 2.01 (m, 1H), 1.86 – 1.72 (m, 4H), 1.65 – 1.58 (m, 2H), 1.58 (s, 1H), 1.55 (d,  $J = 5.3$  Hz, 1H), 1.29 (d,  $J = 15.8$  Hz, 2H);  $^{13}\text{C}$  NMR (126 MHz, Chloroform-*d*)  $\delta_{\text{C}}$  171.33, 150.97, 139.08, 129.39, 129.26, 128.65, 120.49, 116.62, 68.03, 67.96, 67.43, 56.59, 49.80, 49.56, 49.36, 45.48, 41.47, 38.28, 34.31, 33.09, 29.86, 25.63, 24.91, 22.64, 19.94, 17.07, 17.01. HRMS (ESI):  $\text{C}_{31}\text{H}_{42}\text{ClN}_4\text{O}_4\text{S}$  (601.2610)  $[\text{M}+\text{H}]^+=601.2597$ .

Data for **5i** ( $\text{C}_{25}\text{H}_{36}\text{BrN}_3\text{O}_4\text{S}$ ): yield: 78%; white powder; mp: 191.0-192.9 °C;  $^1\text{H}$  NMR (500 MHz, Chloroform-*d*)  $\delta_{\text{H}}$  7.73 – 7.67 (m, 2H), 7.70 – 7.60 (m, 2H), 4.96 – 4.88 (m, 1H), 4.57 (t,  $J = 11.8$  Hz, 1H), 3.64 (dd,  $J = 11.1, 5.0$  Hz, 1H), 3.48 – 3.38 (m, 3H), 3.38 (dd,  $J = 7.3, 2.8$  Hz, 1H), 3.13 – 3.01 (m, 5H), 2.95 – 2.92 (m, 1H), 2.72 – 2.60 (m, 1H), 2.55 – 2.42 (m, 1H), 2.50 – 2.46 (m, 1H), 2.32 – 2.23 (m, 1H), 2.22 –



2.18 (m, 1H), 2.23 – 2.08 (m, 3H), 2.04 – 1.90 (m, 2H), 1.89 – 1.81 (m, 2H), 1.84 – 1.76 (m, 1H), 1.78 – 1.64 (m, 2H), 1.61 – 1.45 (m, 4H);  $^{13}\text{C}$  NMR (126 MHz, Chloroform-*d*)  $\delta_{\text{C}}$  171.48, 139.23, 132.22, 128.73, 127.23, 69.65, 69.09, 67.04, 56.79, 50.09, 46.61, 45.60, 38.82, 35.05, 34.51, 29.46, 26.14, 26.07, 25.26, 24.44, 19.65, 17.25, 17.17. HRMS (ESI):  $\text{C}_{25}\text{H}_{37}\text{BrN}_3\text{O}_4\text{S}$  (554.1683)  $[\text{M}+\text{H}]^+=554.1679$ .

Data for **5j** ( $\text{C}_{25}\text{H}_{36}\text{BrN}_3\text{O}_5\text{S}$ ): yield: 96%; white powder; mp: 181.4-183.6 °C;  $^1\text{H}$  NMR (500 MHz, Chloroform-*d*)  $\delta_{\text{H}}$  7.69 (d,  $J = 8.8$  Hz, 2H), 7.66 (d,  $J = 8.8$  Hz, 2H), 4.79 – 4.76 (m, 1H), 4.48 – 4.39 (m, 1H), 3.73 – 3.53 (m, 7H), 3.53 – 3.42 (m, 2H), 3.26 (d,  $J = 11.9$  Hz, 2H), 3.13 – 3.10 (m, 3H), 2.62 (d,  $J = 13.9$  Hz, 1H), 2.43 (dd,  $J = 16.2, 12.6$  Hz, 1H), 2.39 – 2.29 (m, 1H), 2.27 – 2.19 (m, 1H), 2.21 – 2.10 (m, 4H), 2.06 – 1.96 (m, 1H), 1.85 – 1.69 (m, 4H), 1.61 – 1.49 (m, 2H), 1.26 (s, 1H);  $^{13}\text{C}$  NMR (126 MHz, Chloroform-*d*)  $\delta_{\text{C}}$  171.55, 138.89, 132.31, 128.70, 127.43, 69.10, 68.60, 67.29, 66.90, 66.75, 56.63, 49.87, 45.98, 41.87, 38.59, 34.72, 32.99, 29.56, 25.89, 25.13, 19.93, 17.18, 17.10. HRMS (ESI):  $\text{C}_{25}\text{H}_{37}\text{BrN}_3\text{O}_5\text{S}$  (570.1632)  $[\text{M}+\text{H}]^+=570.1625$ .

Data for **5k** ( $\text{C}_{25}\text{H}_{37}\text{BrN}_4\text{O}_4\text{S}$ ): yield: 69%; white powder; mp: 164.2-165.9 °C;  $^1\text{H}$  NMR (500 MHz, Chloroform-*d*)  $\delta_{\text{H}}$  7.72 – 7.68 (m, 2H), 7.67 – 7.64 (m, 2H), 4.74 (s, 1H), 4.37 (s, 1H), 3.66 – 3.51 (m, 3H), 3.50 – 3.38 (m, 2H), 3.22 – 3.18 (m, 6H), 2.90 – 2.78 (m, 3H), 2.56 (s, 1H), 2.40 (s, 1H), 2.28 – 2.15 (m, 1H), 2.17 – 2.07 (m, 3H), 1.99 – 1.96 (m, 1H), 2.02 – 1.91 (m, 1H), 1.83 – 1.70 (m, 2H), 1.75 (s, 2H), 1.62 – 1.54 (m, 3H), 1.54 – 1.49 (m, 1H), 1.32 – 1.24 (m, 1H);  $^{13}\text{C}$  NMR (126 MHz, Chloroform-*d*)  $\delta_{\text{C}}$  171.29, 139.21, 132.28, 128.69, 127.34, 68.56, 67.17, 56.69, 53.47, 49.70, 46.46, 46.12, 45.64, 42.32, 38.54, 34.61, 33.02, 29.62, 25.77, 25.05, 20.07, 17.18, 17.09. HRMS (ESI):  $\text{C}_{25}\text{H}_{38}\text{BrN}_4\text{O}_4\text{S}$  (569.1792)  $[\text{M}+\text{H}]^+=569.1780$ .

Data for **5l** ( $\text{C}_{26}\text{H}_{39}\text{BrN}_4\text{O}_4\text{S}$ ): yield: 83%; white powder; mp: 160.8-162.7 °C;  $^1\text{H}$  NMR (500 MHz, Chloroform-*d*)  $\delta_{\text{H}}$  7.72 – 7.66 (m, 2H), 7.68 – 7.62 (m, 2H), 4.74 (s, 1H), 4.37 (s, 1H), 3.69 – 3.59 (m, 1H), 3.62 – 3.53 (m, 2H), 3.51 – 3.40 (m, 2H), 3.25 – 3.22 (m, 2H), 3.25 – 3.13 (m, 3H), 2.58 – 2.50 (m, 1H), 2.45 – 2.32 (m, 4H), 2.30 (s, 3H), 2.29 – 2.19 (m, 1H), 2.19 – 2.07 (m, 3H), 2.00 – 1.90 (m, 1H), 1.82 – 1.68 (m, 3H), 1.62 – 1.48 (m, 5H), 1.32 – 1.18 (m, 1H), 1.17 – 1.08 (m, 1H);  $^{13}\text{C}$  NMR (126

MHz, Chloroform-*d*)  $\delta_C$  171.18, 139.30, 132.28, 128.66, 127.33, 67.10, 56.68, 55.17, 54.72, 46.05, 45.38, 44.76, 41.42, 38.52, 34.58, 33.03, 29.69, 25.74, 25.03, 20.07, 17.18, 17.09. HRMS (ESI):  $C_{26}H_{40}BrN_4O_4S$  (583.1948)  $[M+H]^+=583.1941$ .

Data for **5m** ( $C_{25}H_{34}BrN_3O_5S_2$ ): yield: 78%; white powder; mp: 149.4-151.6 °C;  $^1H$  NMR (500 MHz, Chloroform-*d*)  $\delta_H$  7.71 – 7.63 (m, 4H), 4.69 – 4.64 (m, 1H), 4.66 – 4.48 (m, 1H), 4.16 – 4.07 (m, 1H), 3.62 – 3.52 (m, 1H), 3.40 – 3.27 (m, 6H), 3.30 – 3.21 (m, 1H), 2.71 – 2.62 (m, 1H), 2.34 – 2.28 (m, 2H), 2.31 – 2.24 (m, 1H), 2.23 – 2.12 (m, 3H), 2.11 – 2.03 (m, 1H), 1.79 (s, 3H), 1.77 (d,  $J = 13.3$  Hz, 1H), 1.68 – 1.59 (m, 3H), 1.55 – 1.40 (m, 2H), 1.36 – 1.23 (m, 1H);  $^{13}C$  NMR (126 MHz, Deuterium Oxide)  $\delta_C$  209.50, 176.60, 175.97, 135.67, 132.50, 128.91, 128.18, 67.43, 66.34, 65.97, 59.14, 58.42, 55.19, 46.81, 36.03, 35.24, 31.35, 29.97, 27.50, 23.70, 23.55, 20.47, 20.34, 19.63, 15.94. HRMS (ESI):  $C_{25}H_{35}BrN_3O_5S_2$  (600.1196)  $[M+H]^+=600.1191$ .

Data for **5n** ( $C_{24}H_{31}BrN_4O_4S_2$ ): yield: 49%; white powder; mp: 185.8-188.3 °C;  $^1H$  NMR (500 MHz, Chloroform-*d*)  $\delta_H$  7.71 – 7.59 (m, 4H), 7.45 (d,  $J = 3.6$  Hz, 1H), 6.96 (d,  $J = 3.4$  Hz, 1H), 4.99 (s, 1H), 4.30 (s, 1H), 3.71 – 3.64 (m, 1H), 3.61 – 3.42 (m, 2H), 3.23 – 3.19 (m, 1H), 3.15 – 3.12 (m, 2H), 2.60 – 2.50 (m, 1H), 2.44 (dd,  $J = 14.6, 6.6$  Hz, 1H), 2.35 (s, 2H), 2.11 – 2.02 (m, 2H), 1.92 – 1.88 (m, 2H), 1.78 (s, 2H), 1.70 – 1.49 (m, 3H), 1.42 – 1.24 (m, 3H);  $^{13}C$  NMR (126 MHz, Deuterium Oxide)  $\delta_C$  173.82, 160.92, 135.10, 132.42, 128.83, 128.26, 127.17, 115.04, 67.31, 66.31, 65.93, 58.42, 54.94, 46.54, 35.66, 34.99, 31.19, 31.08, 23.61, 23.50, 18.26, 15.83. HRMS (ESI):  $C_{24}H_{32}BrN_4O_4S_2$  (583.1043)  $[M+H]^+=583.1036$ .

Data for **5o** ( $C_{31}H_{47}BrN_4O_4S$ ): yield: 79%; white powder; mp: 218.4-219.8 °C;  $^1H$  NMR (500 MHz, Chloroform-*d*)  $\delta_H$  7.73 – 7.62 (m, 4H), 4.84 – 4.80 (m, 1H), 4.67 – 4.60 (m, 1H), 4.47 (t,  $J = 12.0$  Hz, 1H), 3.89 (dd,  $J = 12.7, 8.6$  Hz, 1H), 3.69 – 3.57 (m, 1H), 3.27 – 3.16 (m, 1H), 3.14 (d,  $J = 19.3$  Hz, 4H), 3.03 (s, 3H), 3.00 – 2.91 (m, 1H), 2.64 – 2.58 (m, 1H), 2.54 – 2.48 (m, 4H), 2.48 – 2.44 (m, 1H), 2.47 – 2.40 (m, 1H), 2.36 – 2.27 (m, 1H), 2.27 (s, 1H), 2.25 – 2.15 (m, 1H), 2.15 – 2.08 (m, 2H), 2.02 – 1.92 (m, 1H), 1.92 – 1.85 (m, 1H), 1.88 – 1.74 (m, 1H), 1.76 – 1.71 (m, 2H), 1.74 – 1.65 (m, 1H), 1.67 – 1.48 (m, 7H), 1.47 – 1.32 (m, 3H), 1.13 (t, 1H);  $^{13}C$  NMR (126

MHz, Chloroform-*d*)  $\delta_C$  171.03, 139.21, 132.27, 128.70, 127.30, 69.39, 68.86, 67.00, 62.64, 62.62, 56.71, 53.46, 50.25, 50.23, 45.20, 45.04, 41.34, 41.30, 38.64, 35.29, 33.23, 33.14, 29.57, 28.81, 28.66, 27.73, 27.68, 26.26, 26.23, 25.92, 25.14, 24.65, 20.08, 17.22, 17.13, 15.51. HRMS (ESI):  $C_{31}H_{48}BrN_4O_4S$  (651.2574)  $[M+H]^+=651.2562$ .

Data for **5p** ( $C_{31}H_{41}BrN_4O_4S$ ): yield: 89%; white powder; mp: 185.3-187.1 °C;  $^1H$  NMR (500 MHz, Chloroform-*d*)  $\delta_H$  7.72 – 7.66 (m, 2H), 7.66 (d,  $J = 8.7$  Hz, 2H), 7.33 – 7.24 (m, 2H), 6.99 – 6.90 (m, 3H), 6.95 – 6.87 (m, 1H), 4.67 (d,  $J = 10.6$  Hz, 1H), 4.35 (t,  $J = 11.5$  Hz, 1H), 3.84 – 3.75 (m, 1H), 3.77 – 3.68 (m, 1H), 3.70 – 3.57 (m, 3H), 3.41 – 3.28 (m, 2H), 3.24 – 3.03 (m, 5H), 2.58 (s, 1H), 2.45 – 2.33 (m, 2H), 2.28 – 2.17 (m, 2H), 2.18 – 2.09 (m, 2H), 2.07 – 1.96 (m, 1H), 1.94 (s, 1H), 1.86 – 1.70 (m, 4H), 1.62 – 1.57 (m, 1H), 1.57 (s, 1H), 1.58 – 1.50 (m, 1H), 1.37 – 1.22 (m, 1H);  $^{13}C$  NMR (126 MHz, Chloroform-*d*)  $\delta_C$  171.35, 150.97, 138.79, 132.33, 129.25, 128.71, 127.47, 120.46, 116.61, 68.66, 68.14, 67.44, 56.61, 49.80, 49.35, 45.48, 41.45, 38.45, 34.54, 33.15, 29.70, 25.77, 25.03, 22.75, 19.99, 17.15. HRMS (ESI):  $C_{31}H_{42}BrN_4O_4S$  (645.2105)  $[M+H]^+=645.2093$ .

Data for **6c** ( $C_{26}H_{36}ClN_5O_3S$ ): yield: 96%; white powder; mp: 133.9-136.1 °C;  $^1H$  NMR (500 MHz, Chloroform-*d*)  $\delta_H$  7.84 – 7.77 (m, 2H), 7.54 – 7.50 (m, 2H), 4.08 – 4.00 (m, 1H), 3.70 (h,  $J = 5.2$  Hz, 4H), 3.68 – 3.57 (m, 3H), 3.61 – 3.49 (m, 2H), 3.11 (dd,  $J = 15.2, 12.2$  Hz, 1H), 2.68 – 2.59 (m, 2H), 2.45 – 2.28 (m, 4H), 2.10 – 1.97 (m, 1H), 1.82 – 1.57 (m, 5H), 1.60 – 1.41 (m, 5H), 1.40 – 1.19 (m, 4H);  $^{13}C$  NMR (126 MHz, Chloroform-*d*)  $\delta_C$  171.20, 139.31, 139.27, 129.65, 128.52, 116.29, 64.49, 57.17, 51.57, 50.93, 45.41, 44.82, 43.34, 43.14, 42.49, 41.44, 40.87, 32.30, 26.47, 25.17, 24.50, 24.10, 23.85, 22.80. HRMS (ESI):  $C_{26}H_{37}ClN_5O_3S$  (534.2300)  $[M+H]^+=534.2294$ .

Data for **6d** ( $C_{27}H_{38}ClN_5O_3S$ ): yield: 48%; white powder; mp: 133.1-134.7 °C;  $^1H$  NMR (500 MHz, Chloroform-*d*)  $\delta_H$  7.83 – 7.77 (m, 2H), 7.54 – 7.48 (m, 2H), 4.07 – 3.99 (m, 1H), 3.72 – 3.62 (m, 2H), 3.64 – 3.56 (m, 1H), 3.55 – 3.43 (m, 2H), 3.15 – 3.05 (m, 1H), 2.68 – 2.59 (m, 2H), 2.48 – 2.39 (m, 5H), 2.35 (s, 3H), 2.39 – 2.29 (m, 3H), 2.32 – 2.22 (m, 1H), 2.07 – 1.93 (m, 2H), 1.84 – 1.76 (m, 1H), 1.79 – 1.37 (m,

8H), 1.37 – 1.23 (m, 2H);  $^{13}\text{C}$  NMR (126 MHz, Chloroform-*d*)  $\delta_{\text{C}}$  170.87, 139.27, 139.23, 129.62, 128.53, 116.27, 64.52, 57.18, 54.62, 54.27, 51.57, 45.79, 45.43, 45.32, 44.67, 43.12, 42.52, 40.72, 32.22, 26.47, 25.14, 24.48, 24.09, 23.84, 22.93. HRMS (ESI):  $\text{C}_{27}\text{H}_{39}\text{ClN}_5\text{O}_3\text{S}$  (548.2457)  $[\text{M}+\text{H}]^+=548.2448$ .

Data for **6e** ( $\text{C}_{26}\text{H}_{33}\text{ClN}_4\text{O}_4\text{S}_2$ ): yield: 78%; white powder; mp: 122.5-124.8 °C;  $^1\text{H}$  NMR (500 MHz, Chloroform-*d*)  $\delta_{\text{H}}$  7.83 – 7.78 (m, 2H), 7.55 – 7.50 (m, 2H), 6.08 (dd,  $J = 15.2, 6.4$  Hz, 1H), 4.63 – 4.49 (m, 1H), 4.07 – 3.98 (m, 1H), 3.66 – 3.58 (m, 1H), 3.41 – 3.32 (m, 1H), 3.30 – 3.23 (m, 1H), 3.16 – 3.06 (m, 1H), 2.96 – 2.82 (m, 1H), 2.67 – 2.61 (m, 1H), 2.64 – 2.52 (m, 1H), 2.45 – 2.14 (m, 5H), 2.13 – 1.88 (m, 2H), 1.83 – 1.70 (m, 1H), 1.73 – 1.65 (m, 1H), 1.65 – 1.56 (m, 1H), 1.59 – 1.50 (m, 4H), 1.52 – 1.47 (m, 2H), 1.49 – 1.23 (m, 3H);  $^{13}\text{C}$  NMR (126 MHz, Chloroform-*d*)  $\delta_{\text{C}}$  205.41, 172.98, 139.32, 139.22, 129.67, 128.51, 116.22, 64.49, 59.34, 56.89, 51.57, 50.92, 45.39, 43.16, 42.51, 35.39, 31.82, 27.54, 25.94, 25.11, 24.51, 24.09, 23.29, 23.08. HRMS (ESI):  $\text{C}_{26}\text{H}_{34}\text{ClN}_4\text{O}_4\text{S}_2$  (565.1705)  $[\text{M}+\text{H}]^+=565.1697$ .

Data for **6f** ( $\text{C}_{25}\text{H}_{30}\text{ClN}_5\text{O}_3\text{S}_2$ ): yield: 98%; white powder; mp: 155.2-157.3 °C;  $^1\text{H}$  NMR (500 MHz, Chloroform-*d*)  $\delta_{\text{H}}$  12.12 (s, 1H), 7.83 – 7.75 (m, 2H), 7.52 – 7.47 (m, 2H), 7.46 (d,  $J = 3.6$  Hz, 1H), 7.02 (d,  $J = 3.6$  Hz, 1H), 4.09 – 4.01 (m, 1H), 3.68 – 3.61 (m, 1H), 3.10 (dd,  $J = 15.3, 11.9$  Hz, 1H), 2.67 – 2.59 (m, 3H), 2.56 (t,  $J = 7.2$  Hz, 2H), 2.43 – 2.29 (m, 2H), 2.17 – 2.05 (m, 1H), 1.85 – 1.75 (m, 2H), 1.71 (s, 1H), 1.77 – 1.66 (m, 1H), 1.68 – 1.59 (m, 1H), 1.61 – 1.52 (m, 2H), 1.53 (s, 1H), 1.54 – 1.42 (m, 2H), 1.41 – 1.23 (m, 2H);  $^{13}\text{C}$  NMR (126 MHz, Chloroform-*d*)  $\delta_{\text{C}}$  170.51, 159.85, 139.33, 139.23, 136.35, 129.63, 128.47, 116.26, 113.52, 64.51, 56.97, 51.57, 50.94, 45.38, 43.16, 42.58, 35.13, 26.06, 25.14, 24.50, 24.09, 23.86, 22.71. HRMS(ESI):  $\text{C}_{25}\text{H}_{31}\text{ClN}_5\text{O}_3\text{S}_2$  (546.1406)  $[\text{M}-\text{H}]^-=546.1407$ .

Data for **6g** ( $\text{C}_{32}\text{H}_{46}\text{ClN}_5\text{O}_3\text{S}$ ): yield: 98%; white powder; mp: 206.7-208.4 °C;  $^1\text{H}$  NMR (500 MHz, Chloroform-*d*)  $\delta_{\text{H}}$  7.82 – 7.76 (m, 2H), 7.55 – 7.47 (m, 2H), 4.78 – 4.69 (m, 1H), 4.05 – 3.98 (m, 1H), 3.97 – 3.89 (m, 1H), 3.64 – 3.56 (m, 1H), 3.14 – 3.04 (m, 2H), 3.06 – 2.95 (m, 1H), 2.93 – 2.86 (m, 1H), 2.89 (s, 1H), 2.78 (s, 5H), 2.67 – 2.58 (m, 2H), 2.57 – 2.47 (m, 1H), 2.38 (dd,  $J = 12.5, 3.4$  Hz, 1H), 2.36 – 2.22 (m, 3H), 2.13 (s, 1H), 2.07 – 1.93 (m, 3H), 1.83 (s, 5H), 1.80 – 1.68 (m, 1H), 1.68 –

1.53 (m, 4H), 1.56 – 1.46 (m, 3H), 1.40 – 1.23 (m, 4H);  $^{13}\text{C}$  NMR (126 MHz, Chloroform-*d*)  $\delta_{\text{C}}$  170.72, 139.30, 139.25, 129.61, 128.57, 128.53, 116.27, 64.53, 63.13, 57.22, 51.58, 50.93, 49.89, 45.72, 45.47, 45.41, 44.75, 43.14, 42.54, 40.88, 32.35, 27.79, 26.49, 25.15, 24.50, 24.10, 23.86, 23.63, 23.06, 22.97, 8.78. HRMS (ESI):  $\text{C}_{32}\text{H}_{45}\text{ClN}_5\text{O}_3\text{S}$  (614.2937)  $[\text{M}-\text{H}]^{-}=614.2938$ .

Data for **6h** ( $\text{C}_{32}\text{H}_{40}\text{ClN}_5\text{O}_3\text{S}$ ): yield: 55%; white powder; mp: 159.1-161.9 °C;  $^1\text{H}$  NMR (500 MHz, Chloroform-*d*)  $\delta_{\text{H}}$  7.85 – 7.78 (m, 2H), 7.55 – 7.48 (m, 2H), 7.30 (dd,  $J = 8.8, 7.2$  Hz, 2H), 6.96 (s, 1H), 6.96 – 6.89 (m, 2H), 4.09 – 4.01 (m, 1H), 3.84 – 3.72 (m, 2H), 3.68 – 3.56 (m, 3H), 3.21 – 3.14 (m, 5H), 3.12 (dd,  $J = 15.2, 12.2$  Hz, 1H), 2.68 – 2.60 (m, 2H), 2.45 – 2.28 (m, 4H), 2.08 – 1.98 (m, 2H), 1.86 – 1.78 (m, 1H), 1.78 – 1.46 (m, 8H), 1.41 – 1.23 (m, 2H);  $^{13}\text{C}$  NMR (126 MHz, Chloroform-*d*)  $\delta_{\text{C}}$  170.92, 150.98, 139.26, 129.61, 129.24, 128.58, 120.50, 116.67, 116.31, 64.57, 57.22, 51.60, 50.94, 49.77, 49.43, 45.50, 45.48, 43.15, 42.60, 41.51, 32.40, 26.54, 25.18, 24.52, 24.11, 23.88, 23.00. HRMS (ESI):  $\text{C}_{32}\text{H}_{39}\text{ClN}_5\text{O}_3\text{S}$  (608.2468)  $[\text{M}-\text{H}]^{-}=608.2469$ .

Data for **6i** ( $\text{C}_{26}\text{H}_{35}\text{BrN}_4\text{O}_3\text{S}$ ): yield: 58%; light brown powder; mp: 162.1-164.6 °C;  $^1\text{H}$  NMR (500 MHz, Chloroform-*d*)  $\delta_{\text{H}}$  7.77 – 7.71 (m, 2H), 7.70 – 7.63 (m, 2H), 4.07 – 3.99 (m, 1H), 3.64 – 3.56 (m, 1H), 3.46 (t,  $J = 6.9$  Hz, 3H), 3.42 – 3.35 (m, 1H), 3.38 – 3.31 (m, 1H), 3.10 (dd,  $J = 15.2, 12.1$  Hz, 1H), 2.68 – 2.60 (m, 2H), 2.43 – 2.29 (m, 2H), 2.32 – 2.16 (m, 2H), 2.05 – 1.91 (m, 4H), 1.90 – 1.81 (m, 4H), 1.77 – 1.40 (m, 7H), 1.43 – 1.29 (m, 1H), 1.32 – 1.24 (m, 1H);  $^{13}\text{C}$  NMR (126 MHz, Chloroform-*d*)  $\delta_{\text{C}}$  170.88, 139.80, 132.50, 128.74, 127.65, 116.32, 64.62, 57.34, 51.61, 50.95, 46.59, 45.63, 45.61, 43.14, 42.76, 33.88, 26.54, 26.12, 25.16, 24.53, 24.41, 24.12, 23.90, 22.77. HRMS (ESI):  $\text{C}_{26}\text{H}_{36}\text{BrN}_4\text{O}_3\text{S}$  (563.1686)  $[\text{M}+\text{H}]^{+}=563.1677$ .

Data for **6j** ( $\text{C}_{26}\text{H}_{35}\text{BrN}_4\text{O}_4\text{S}$ ): yield: 74%; white powder; mp: 158.4-160.5 °C;  $^1\text{H}$  NMR (500 MHz, Chloroform-*d*)  $\delta_{\text{H}}$  7.76 – 7.70 (m, 2H), 7.70 – 7.64 (m, 2H), 4.07 – 4.00 (m, 1H), 3.72 – 3.64 (m, 5H), 3.66 – 3.50 (m, 3H), 3.50 – 3.38 (m, 2H), 3.10 (dd,  $J = 15.2, 12.2$  Hz, 1H), 2.68 – 2.60 (m, 2H), 2.43 – 2.21 (m, 4H), 2.08 – 1.94 (m, 1H), 1.85 – 1.77 (m, 1H), 1.76 – 1.68 (m, 2H), 1.71 – 1.63 (m, 2H), 1.66 – 1.44 (m, 5H),

1.40 – 1.23 (m, 2H);  $^{13}\text{C}$  NMR (126 MHz, Chloroform-*d*)  $\delta_{\text{C}}$  171.04, 139.80, 132.57, 128.66, 127.74, 116.29, 66.93, 66.67, 64.55, 57.23, 51.59, 50.94, 45.96, 45.51, 43.14, 42.61, 41.91, 32.19, 26.52, 25.17, 24.51, 24.11, 23.87, 22.92. HRMS (ESI):  $\text{C}_{26}\text{H}_{36}\text{BrN}_4\text{O}_4\text{S}$  (579.1635)  $[\text{M}+\text{H}]^+=579.1626$ .

Data for **6k** ( $\text{C}_{26}\text{H}_{36}\text{BrN}_5\text{O}_3\text{S}$ ): yield: 39%; white powder; mp: 155.1-156.9 °C;  $^1\text{H}$  NMR (500 MHz, Chloroform-*d*)  $\delta_{\text{H}}$  7.76 – 7.71 (m, 2H), 7.71 – 7.65 (m, 2H), 4.08 – 4.00 (m, 1H), 3.76 – 3.65 (m, 5H), 3.63 (t,  $J = 4.7$  Hz, 2H), 3.63 – 3.49 (m, 3H), 3.11 (dd,  $J = 15.3, 12.2$  Hz, 1H), 2.68 – 2.60 (m, 2H), 2.45 – 2.27 (m, 4H), 2.08 – 1.97 (m, 1H), 1.82 – 1.75 (m, 1H), 1.77 – 1.65 (m, 6H), 1.68 – 1.56 (m, 1H), 1.58 – 1.42 (m, 3H), 1.40 – 1.25 (m, 2H);  $^{13}\text{C}$  NMR (126 MHz, Chloroform-*d*)  $\delta_{\text{C}}$  171.18, 139.80, 132.62, 128.61, 127.78, 116.29, 64.49, 57.18, 51.57, 50.93, 45.44, 44.82, 43.34, 43.14, 42.52, 41.44, 40.88, 32.30, 26.48, 25.17, 24.49, 24.10, 23.85, 22.82. HRMS (ESI):  $\text{C}_{26}\text{H}_{35}\text{BrN}_5\text{O}_3\text{S}$  (576.1649)  $[\text{M}-\text{H}]^-=576.1651$ .

Data for **6l** ( $\text{C}_{27}\text{H}_{38}\text{BrN}_5\text{O}_3\text{S}$ ): yield: 46%; white powder; mp: 134.1-136.7 °C;  $^1\text{H}$  NMR (500 MHz, Chloroform-*d*)  $\delta_{\text{H}}$  7.77 – 7.70 (m, 2H), 7.73 – 7.63 (m, 2H), 4.07 – 3.99 (m, 1H), 3.67 (s, 2H), 3.66 (s, 1H), 3.66 – 3.56 (m, 1H), 3.56 – 3.44 (m, 2H), 3.16 – 3.05 (m, 1H), 2.68 – 2.59 (m, 2H), 2.50 – 2.22 (m, 9H), 2.35 (s, 3H), 2.07 – 1.92 (m, 1H), 1.85 – 1.77 (m, 1H), 1.77 – 1.66 (m, 1H), 1.69 – 1.53 (m, 5H), 1.55 – 1.50 (m, 1H), 1.49 (d,  $J = 4.1$  Hz, 1H), 1.47 – 1.30 (m, 1H), 1.32 – 1.24 (m, 1H);  $^{13}\text{C}$  NMR (126 MHz, Chloroform-*d*)  $\delta_{\text{C}}$  170.81, 139.78, 132.57, 128.67, 127.74, 116.28, 64.55, 57.21, 54.99, 54.60, 51.59, 50.93, 45.81, 45.52, 45.17, 43.14, 42.61, 41.23, 32.29, 26.52, 25.16, 24.51, 24.10, 23.87, 22.99. HRMS (ESI):  $\text{C}_{27}\text{H}_{39}\text{BrN}_5\text{O}_3\text{S}$  (592.1951)  $[\text{M}+\text{H}]^+=592.1942$ .

Data for **6m** ( $\text{C}_{26}\text{H}_{33}\text{BrN}_4\text{O}_4\text{S}_2$ ): yield: 74%; white powder; mp: 130.3-132.7 °C;  $^1\text{H}$  NMR (500 MHz, Chloroform-*d*)  $\delta_{\text{H}}$  7.76 – 7.71 (m, 2H), 7.71 – 7.66 (m, 2H), 6.05 (dd,  $J = 16.8, 6.4$  Hz, 1H), 4.62 – 4.49 (m, 1H), 4.07 – 3.98 (m, 1H), 3.66 – 3.57 (m, 1H), 3.42 – 3.32 (m, 1H), 3.31 – 3.23 (m, 1H), 3.16 – 3.06 (m, 1H), 2.96 – 2.85 (m, 1H), 2.68 – 2.60 (m, 2H), 2.43 – 2.14 (m, 5H), 2.13 – 1.90 (m, 3H), 1.84 – 1.62 (m, 3H), 1.66 – 1.43 (m, 6H), 1.46 – 1.23 (m, 2H);  $^{13}\text{C}$  NMR (126 MHz, Chloroform-*d*)  $\delta_{\text{C}}$  205.40, 172.96, 139.75, 132.64, 128.61, 127.81, 116.22, 64.49, 59.36, 56.90, 51.57,

50.93, 45.42, 43.16, 42.54, 35.40, 31.85, 27.55, 25.95, 25.12, 24.51, 24.09, 23.31, 23.09. HRMS (ESI): C<sub>26</sub>H<sub>34</sub>BrN<sub>4</sub>O<sub>4</sub>S<sub>2</sub> (609.1199) [M+H]<sup>+</sup>=609.1190.

Data for **6n** (C<sub>25</sub>H<sub>30</sub>BrN<sub>5</sub>O<sub>3</sub>S<sub>2</sub>): yield: 73%; white powder; mp: 161.3-163.9 °C; <sup>1</sup>H NMR (500 MHz, Chloroform-*d*) δ<sub>H</sub> 12.06 (s, 1H), 7.75 – 7.69 (m, 2H), 7.67 – 7.63 (m, 2H), 7.46 (d, *J* = 3.6 Hz, 1H), 7.02 (d, *J* = 3.6 Hz, 1H), 4.09 – 4.01 (m, 1H), 3.70 – 3.60 (m, 1H), 3.15 – 3.05 (m, 1H), 2.68 – 2.60 (m, 2H), 2.56 (t, *J* = 7.2 Hz, 2H), 2.44 – 2.24 (m, 2H), 2.17 – 2.03 (m, 1H), 1.86 – 1.69 (m, 2H), 1.72 – 1.41 (m, 8H), 1.41 – 1.21 (m, 3H); <sup>13</sup>C NMR (126 MHz, Chloroform-*d*) δ<sub>C</sub> 170.49, 159.81, 139.75, 136.38, 132.62, 128.57, 127.82, 116.26, 113.53, 64.51, 56.97, 51.57, 50.94, 45.40, 43.16, 42.60, 35.13, 26.06, 25.15, 24.49, 24.10, 23.85, 22.71. HRMS (ESI): C<sub>25</sub>H<sub>31</sub>BrN<sub>5</sub>O<sub>3</sub>S<sub>2</sub> (592.1046) [M+H]<sup>+</sup>=592.1040.

Data for **6o** (C<sub>32</sub>H<sub>46</sub>BrN<sub>5</sub>O<sub>3</sub>S): yield: 73%; white powder; mp: 214.7-215.9 °C; <sup>1</sup>H NMR (500 MHz, Chloroform-*d*) δ<sub>H</sub> 7.78 – 7.70 (m, 2H), 7.70 – 7.63 (m, 2H), 4.72 – 4.65 (m, 1H), 4.07 – 3.96 (m, 1H), 3.93 – 3.84 (m, 1H), 3.63 – 3.55 (m, 1H), 3.09 (dd, *J* = 15.2, 12.1 Hz, 2H), 3.03 – 2.89 (m, 1H), 2.67 – 2.60 (m, 1H), 2.63 – 2.57 (m, 7H), 2.57 – 2.47 (m, 1H), 2.42 – 2.22 (m, 4H), 1.99 (s, 1H), 1.99 – 1.92 (m, 1H), 1.95 – 1.85 (m, 1H), 1.84 – 1.77 (m, 1H), 1.76 – 1.69 (m, 1H), 1.69 – 1.62 (m, 7H), 1.62 – 1.49 (m, 3H), 1.51 – 1.39 (m, 5H), 1.39 – 1.23 (m, 2H); <sup>13</sup>C NMR (126 MHz, Chloroform-*d*) δ<sub>C</sub> 170.61, 139.80, 132.56, 128.68, 127.71, 116.29, 64.56, 62.75, 57.23, 51.60, 50.94, 50.07, 45.56, 45.49, 45.10, 45.08, 43.16, 43.12, 42.63, 41.26, 32.42, 32.38, 28.42, 26.53, 25.76, 25.16, 24.52, 24.36, 24.11, 23.88, 23.16, 23.02. HRMS (ESI): C<sub>32</sub>H<sub>47</sub>BrN<sub>5</sub>O<sub>3</sub>S (658.2432) [M-H]<sup>-</sup>=658.2438.

Data for **6p** (C<sub>32</sub>H<sub>40</sub>BrN<sub>5</sub>O<sub>3</sub>S): yield: 98%; light yellow powder; mp: 164.4-66.2 °C; <sup>1</sup>H NMR (500 MHz, Chloroform-*d*) δ<sub>H</sub> 7.77 – 7.70 (m, 2H), 7.70 – 7.65 (m, 2H), 7.30 (dd, *J* = 8.8, 7.4 Hz, 2H), 6.96 (d, *J* = 7.9 Hz, 2H), 6.96 – 6.89 (m, 1H), 4.09 – 4.02 (m, 1H), 3.85 – 3.77 (m, 1H), 3.78 (d, *J* = 5.4 Hz, 1H), 3.68 – 3.56 (m, 3H), 3.21 – 3.14 (m, 5H), 3.12 (dd, *J* = 15.2, 12.1 Hz, 1H), 2.69 – 2.60 (m, 2H), 2.45 – 2.28 (m, 4H), 2.08 – 1.96 (m, 1H), 1.86 – 1.79 (m, 1H), 1.77 – 1.64 (m, 3H), 1.64 – 1.46 (m, 6H), 1.41 – 1.29 (m, 1H), 1.32 – 1.23 (m, 1H); <sup>13</sup>C NMR (126 MHz, Chloroform-*d*) δ<sub>C</sub> 170.91, 150.96, 139.80, 132.58, 129.25, 128.68, 127.75, 120.51,

116.68, 116.30, 64.57, 57.22, 51.60, 50.95, 49.78, 49.44, 45.53, 43.16, 42.62, 41.51, 32.40, 26.55, 25.18, 24.51, 24.11, 23.88, 23.01. HRMS (ESI):  $C_{32}H_{41}BrN_5O_3S$  (654.2108)  $[M+H]^+=654.2100$ .

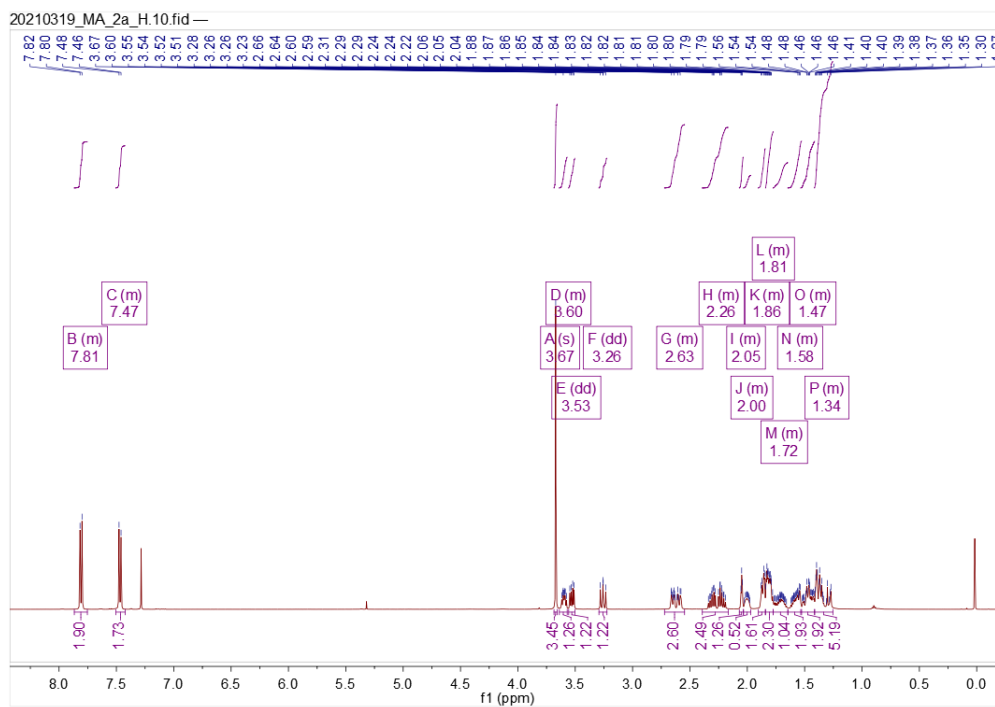

**Figure S1.**  $^1H$  NMR spectrum (Chloroform-*d*, 500 MHz) of **2a**.

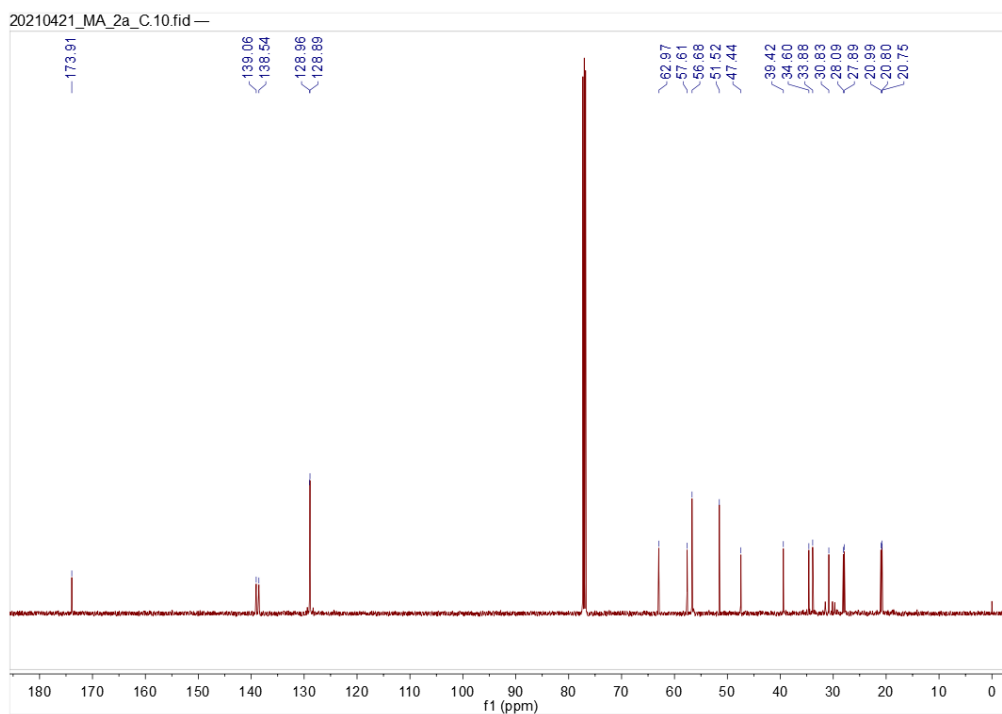

**Figure S2.**  $^{13}C$  NMR spectrum (Chloroform-*d*, 126 MHz) of **2a**.



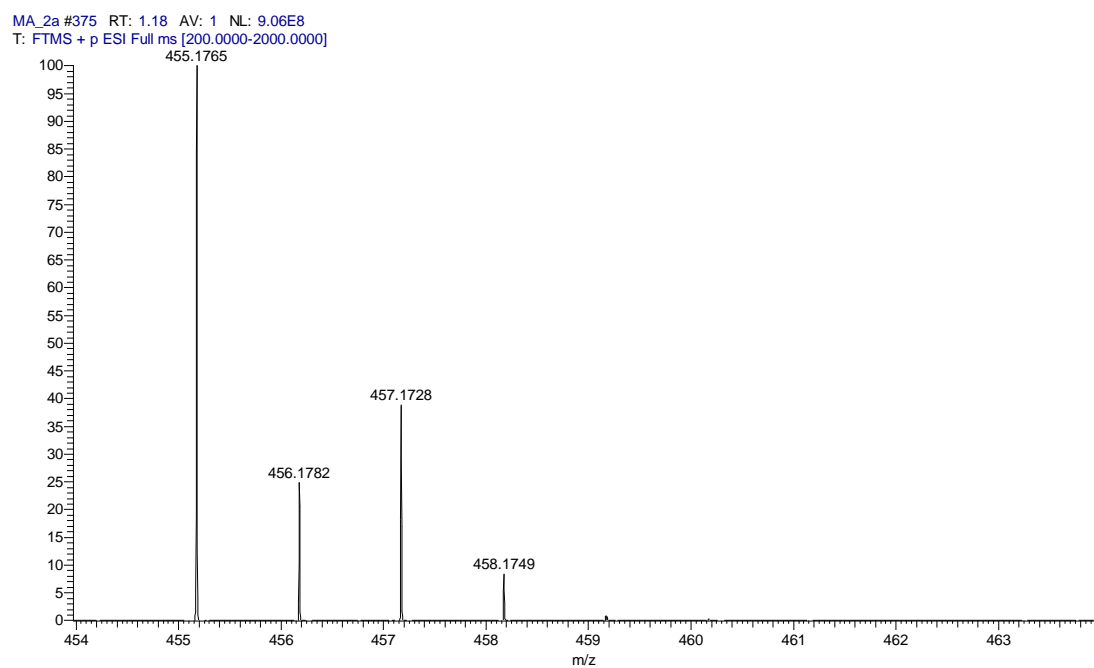

**Figure S3.** HRMS spectrum of **2a**.

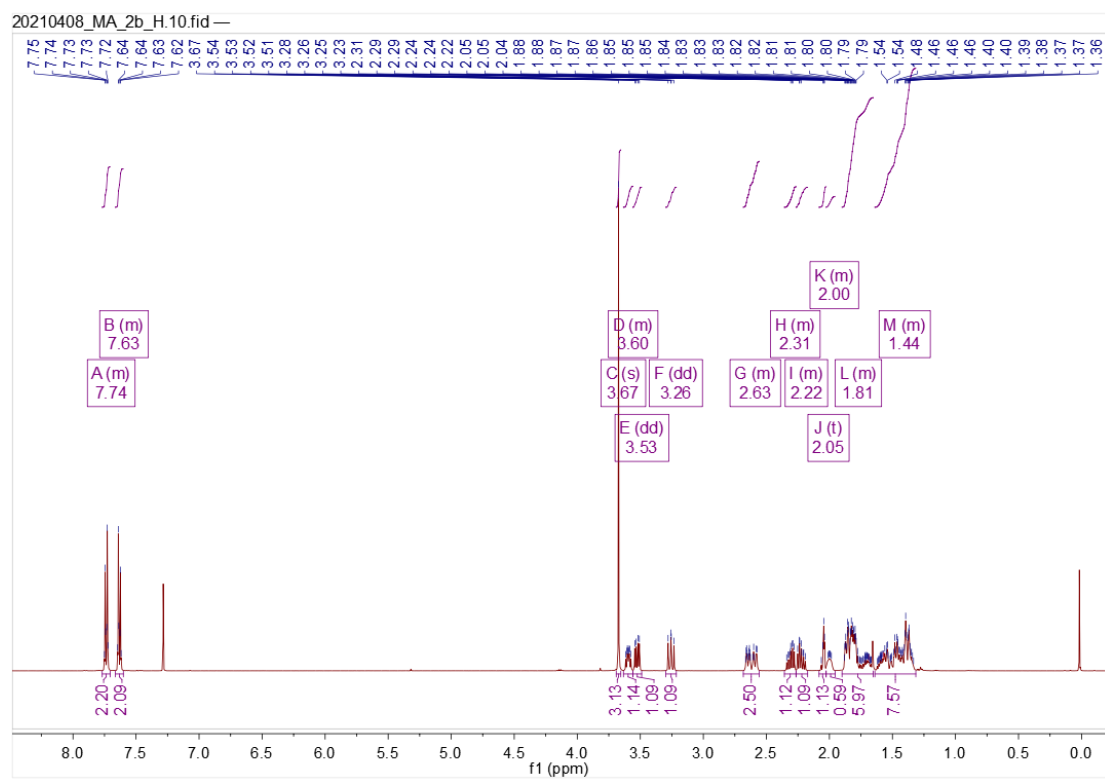

**Figure S4.**  $^1\text{H}$  NMR spectrum (Chloroform- $d$ , 500 MHz) of **2b**.

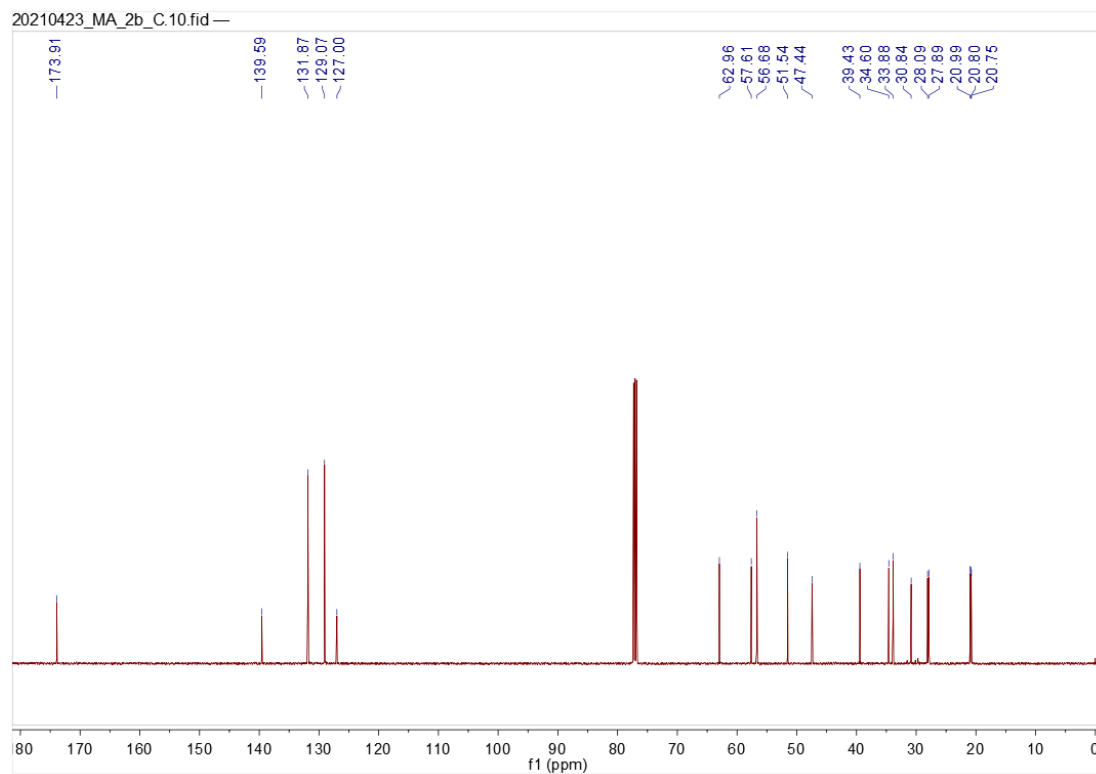

**Figure S5.**  $^{13}\text{C}$  NMR spectrum (Chloroform- $d$ , 126 MHz) of **2b**.

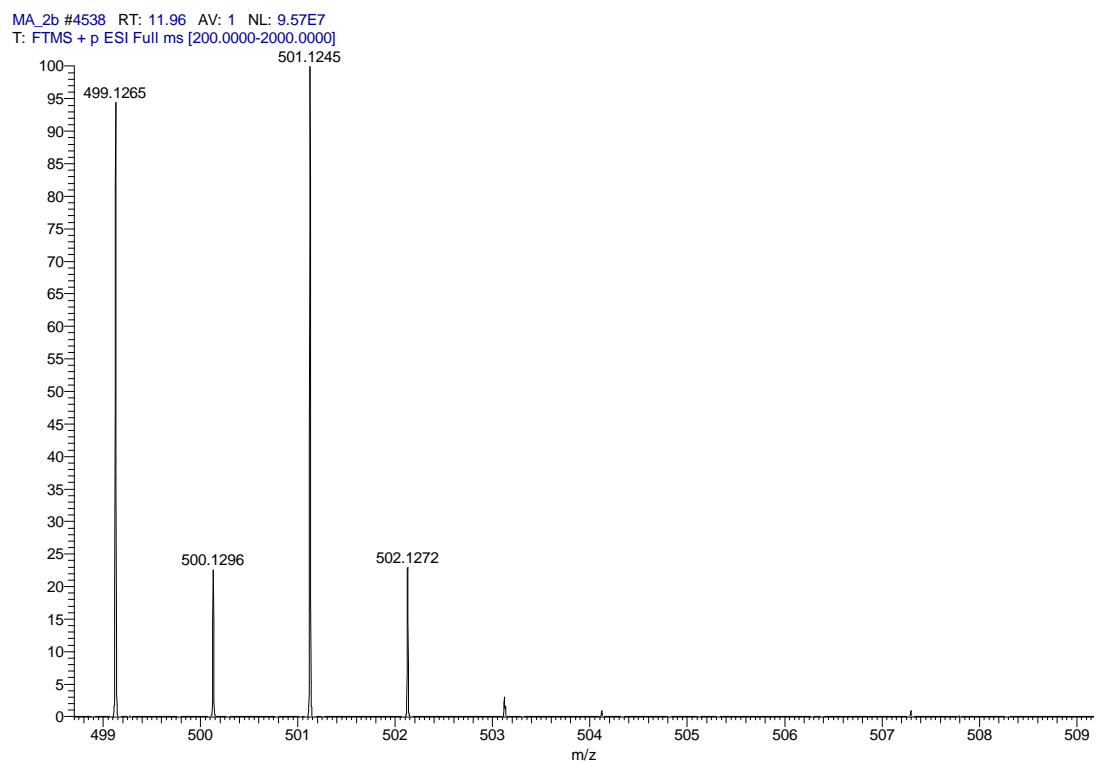

**Figure S6.** HRMS spectrum of **2b**.

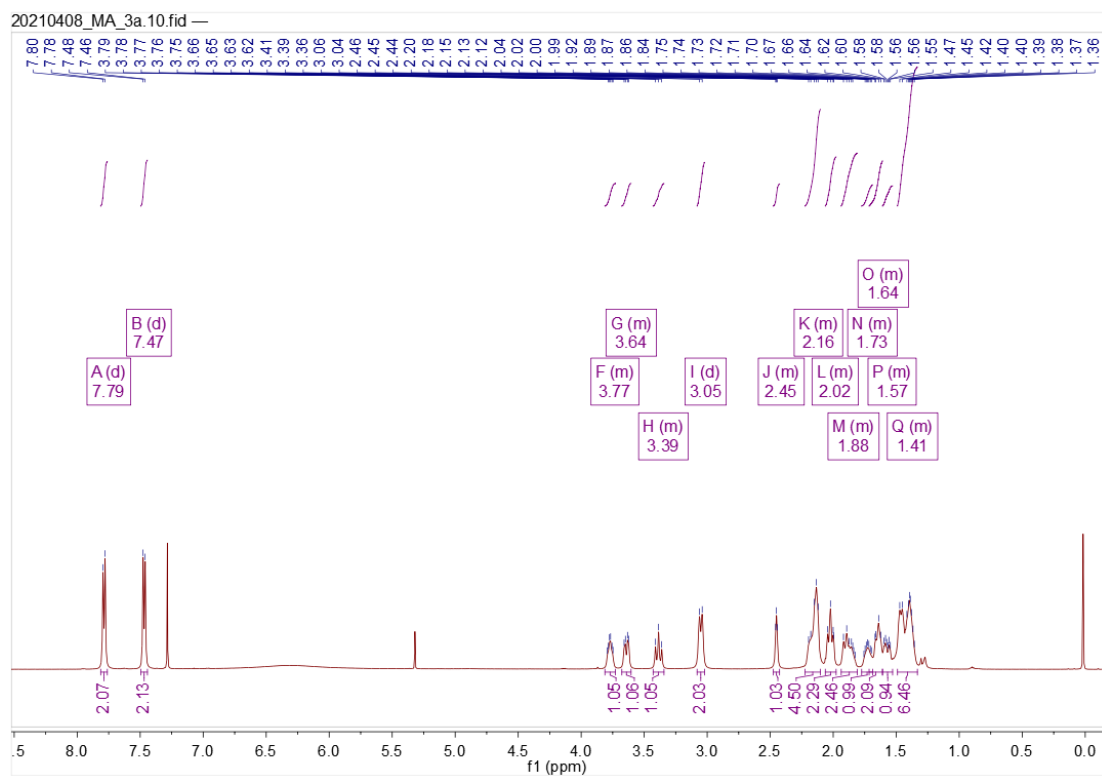

**Figure S7.**  $^1\text{H}$  NMR spectrum (Chloroform- $d$ , 500 MHz) of **3a**.

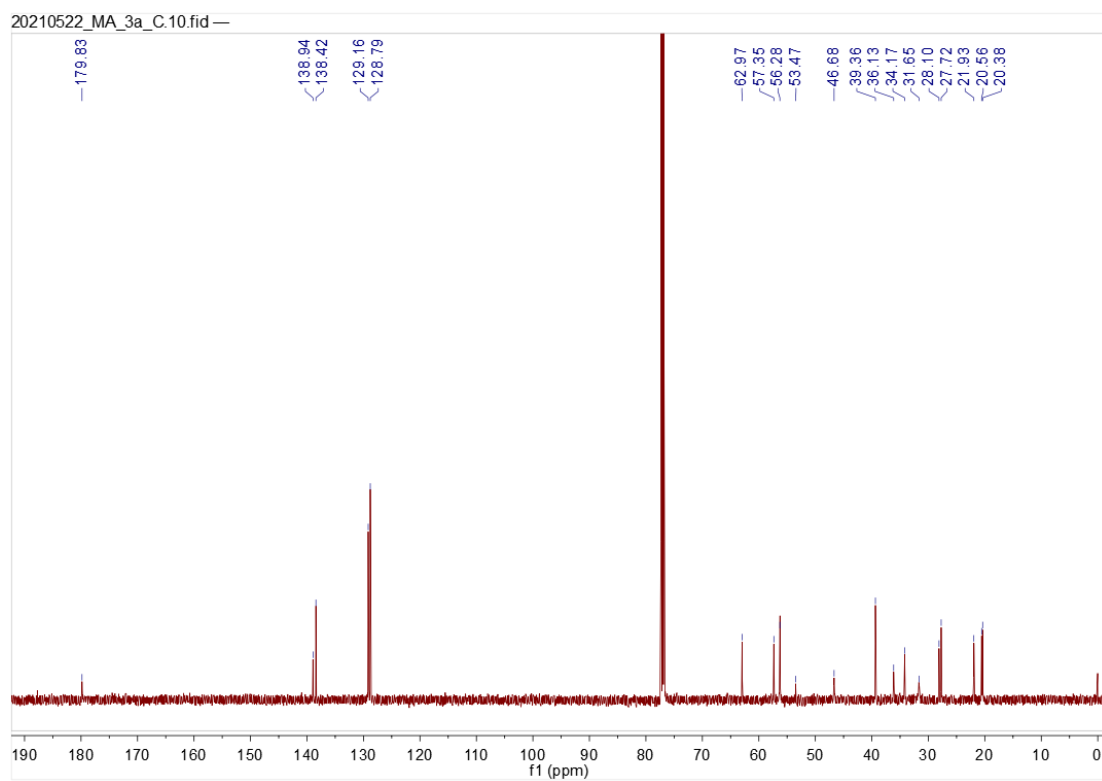

**Figure S8.**  $^{13}\text{C}$  NMR spectrum (Chloroform- $d$ , 126 MHz) of **3a**.

MA\_3a #2402 RT: 7.51 AV: 1 NL: 8.01E7  
T: FTMS + p ESI Full ms [200.0000-2000.0000]

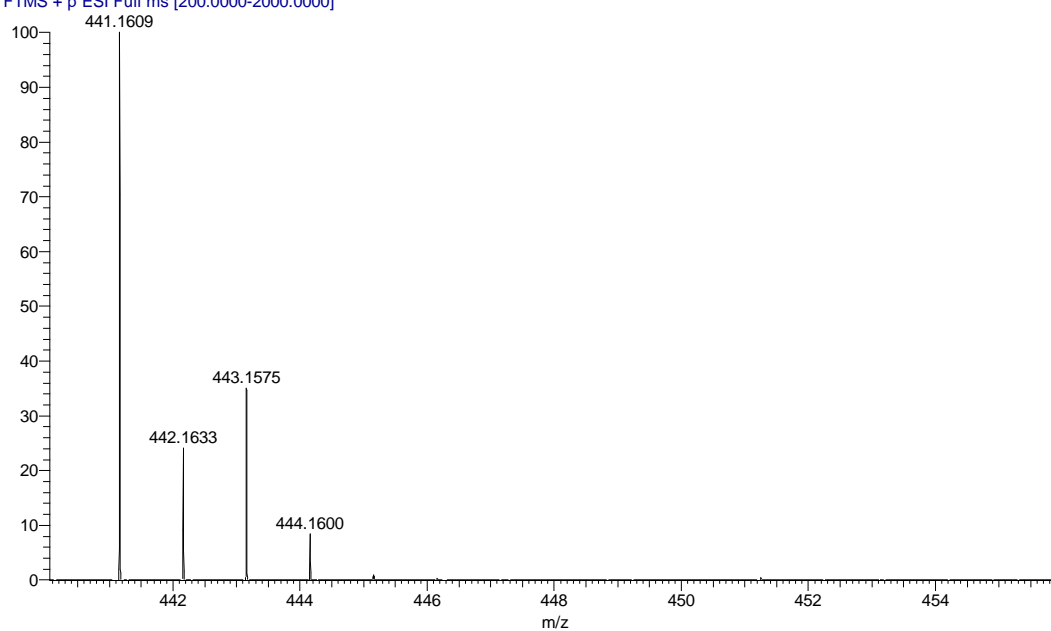

**Figure S9.** HRMS spectrum of **3a**.

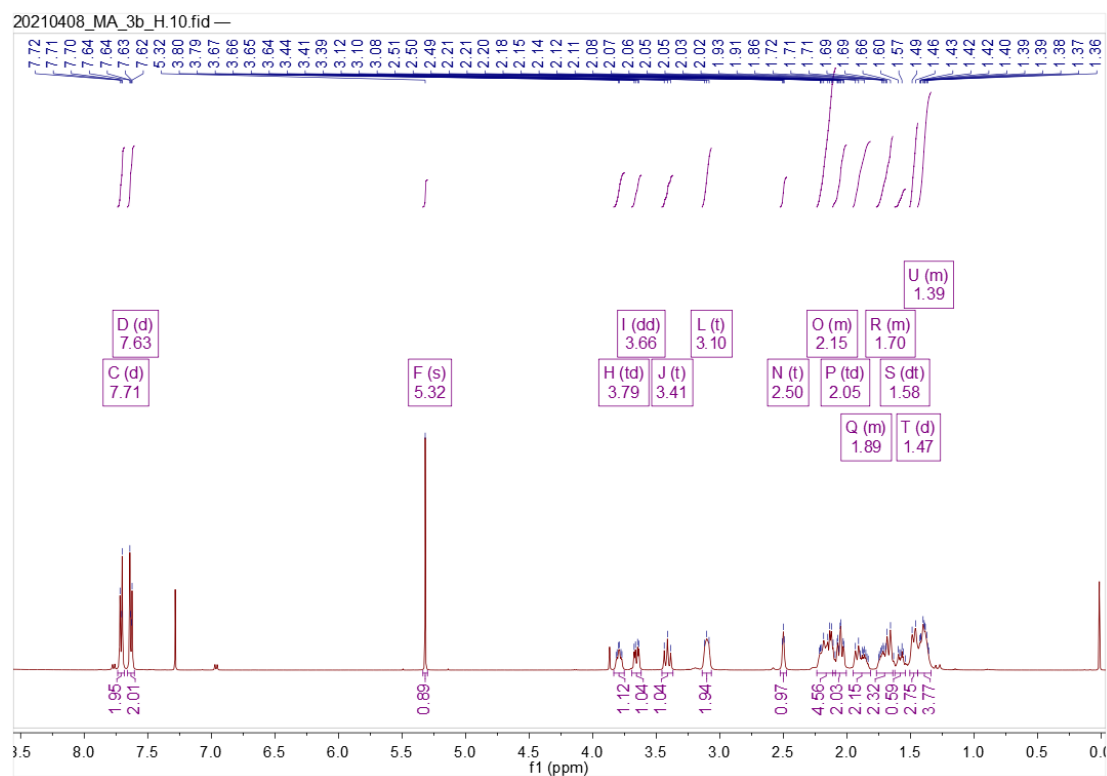

**Figure S10.**  $^1\text{H}$  NMR spectrum (Chloroform- $d$ , 500 MHz) of **3b**.

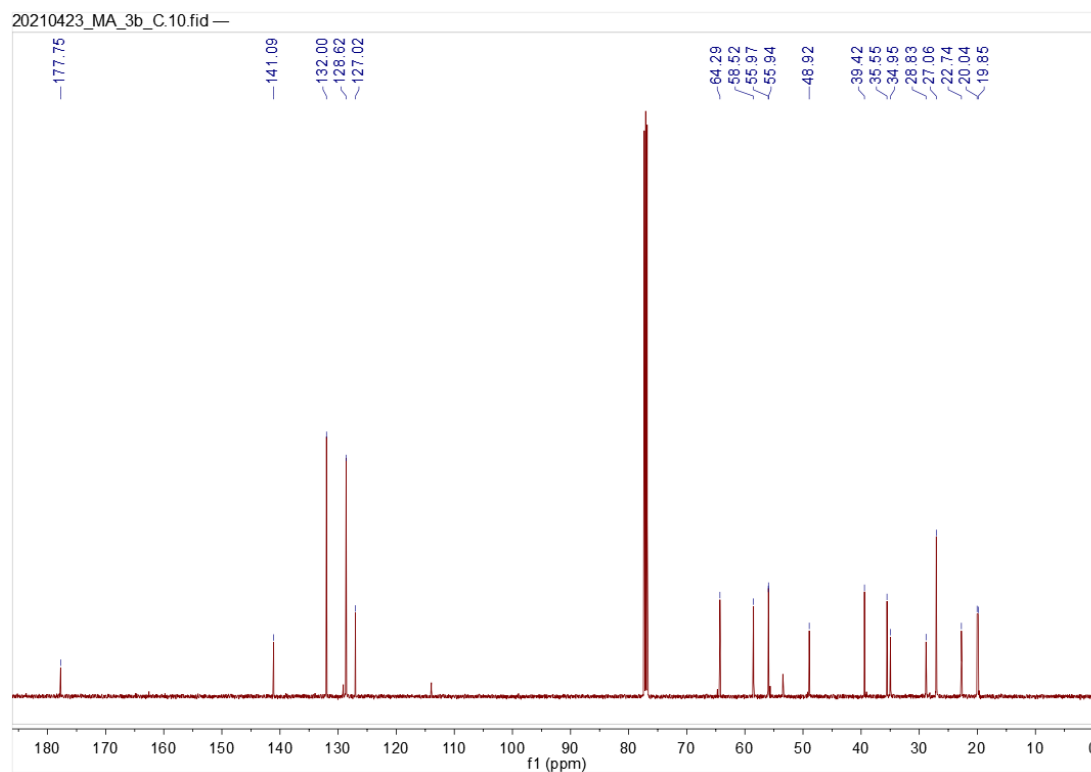

**Figure S11.**  $^{13}\text{C}$  NMR spectrum (Chloroform-*d*, 126 MHz) of **3b**.

MA\_3b #2722 RT: 8.06 AV: 1 NL: 2.11E8  
T: FTMS + p ESI Full ms [200.0000-2000.0000]

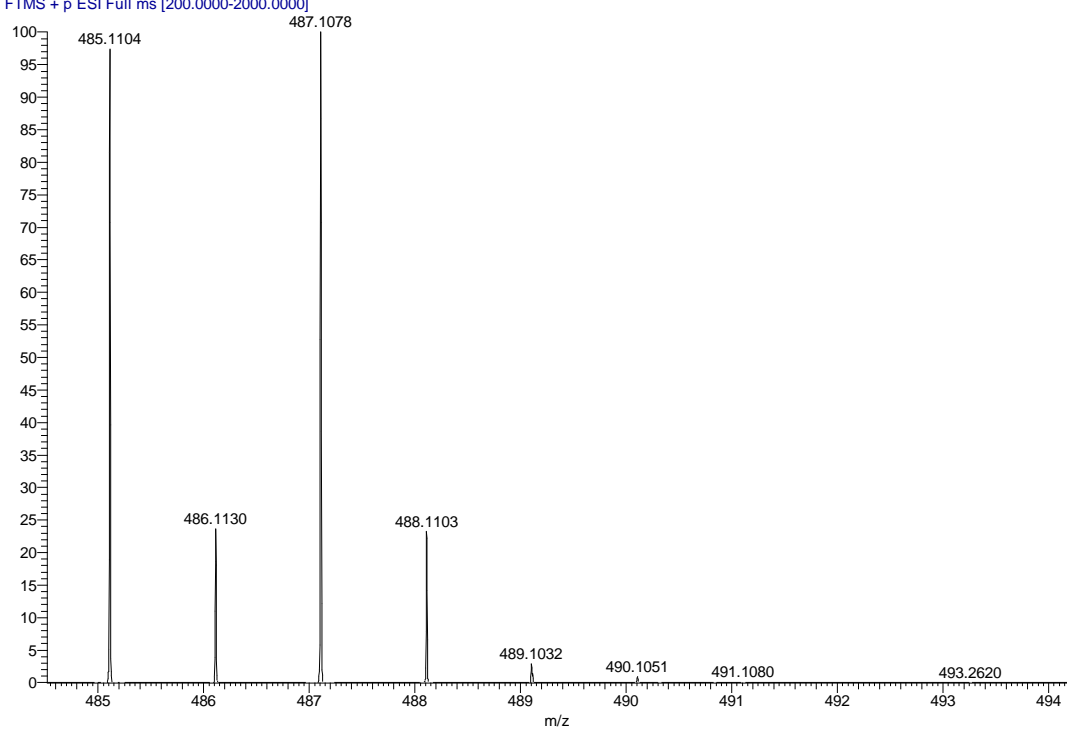

**Figure S12.** HRMS spectrum of **3b**.

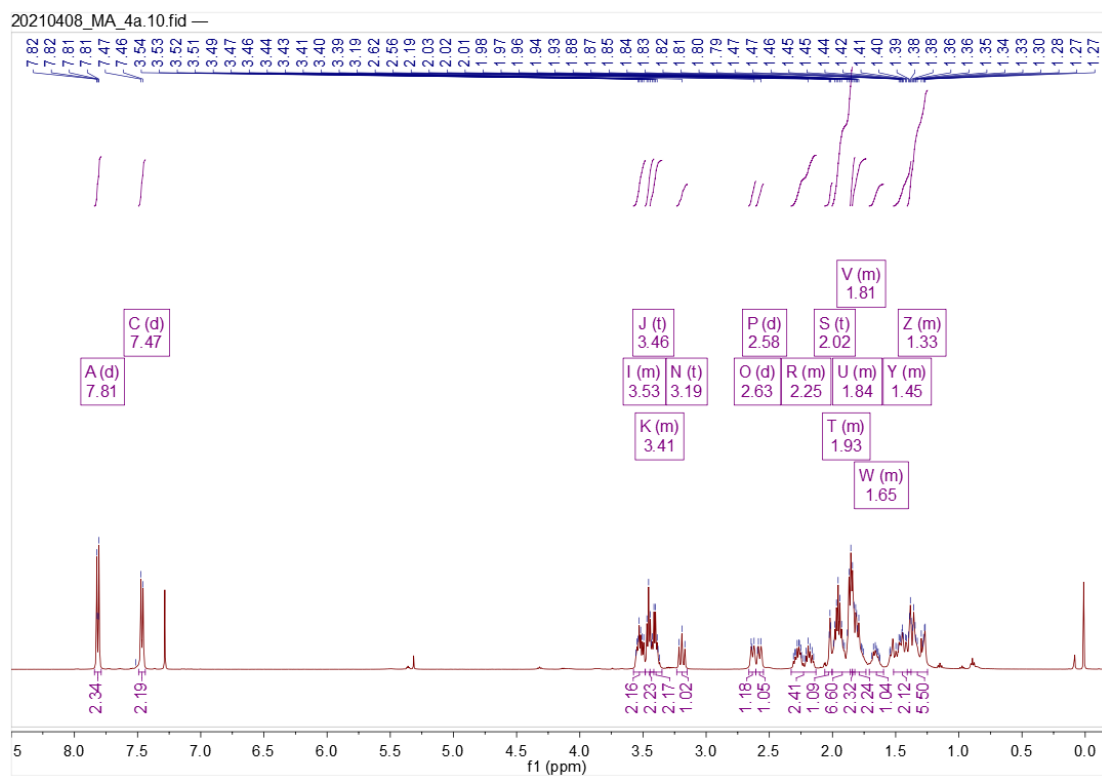

**Figure S13.**  $^1\text{H}$  NMR spectrum (Chloroform- $d$ , 500 MHz) of **4a**.

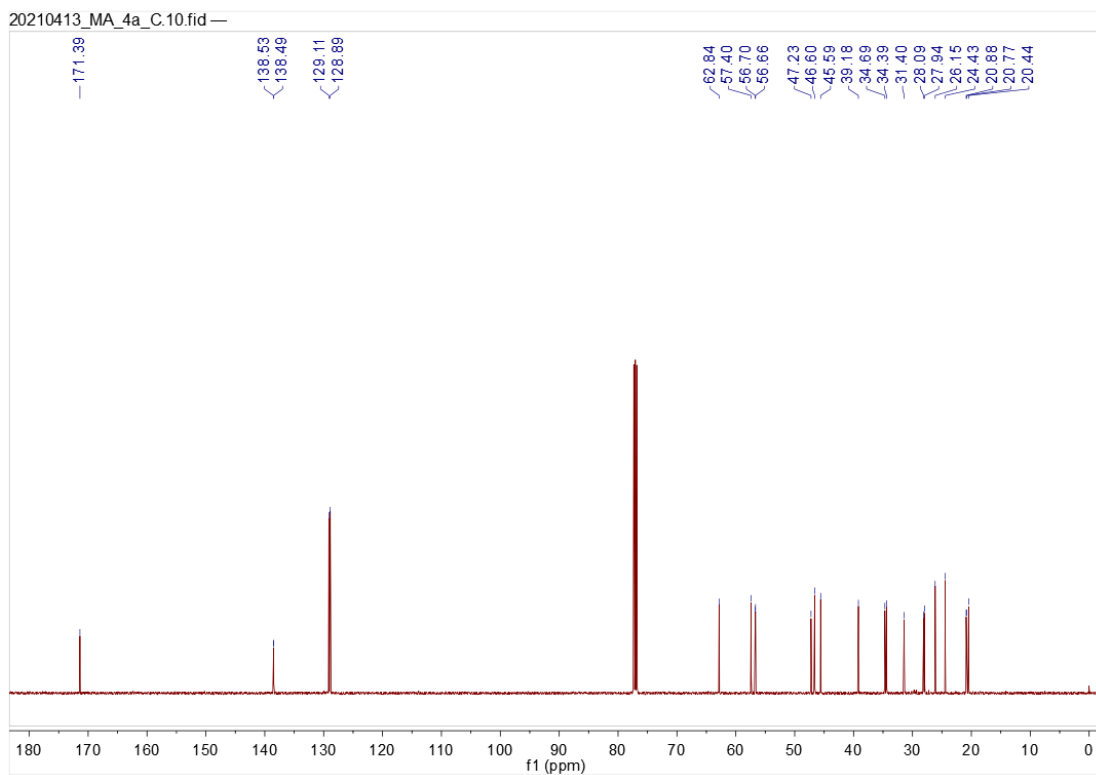

**Figure S14.**  $^{13}\text{C}$  NMR spectrum (Chloroform- $d$ , 126 MHz) of **4a**.

MA\_4a #4029 RT: 10.71 AV: 1 NL: 5.42E8  
T: FTMS + p ESI Full ms [200.0000-2000.0000]

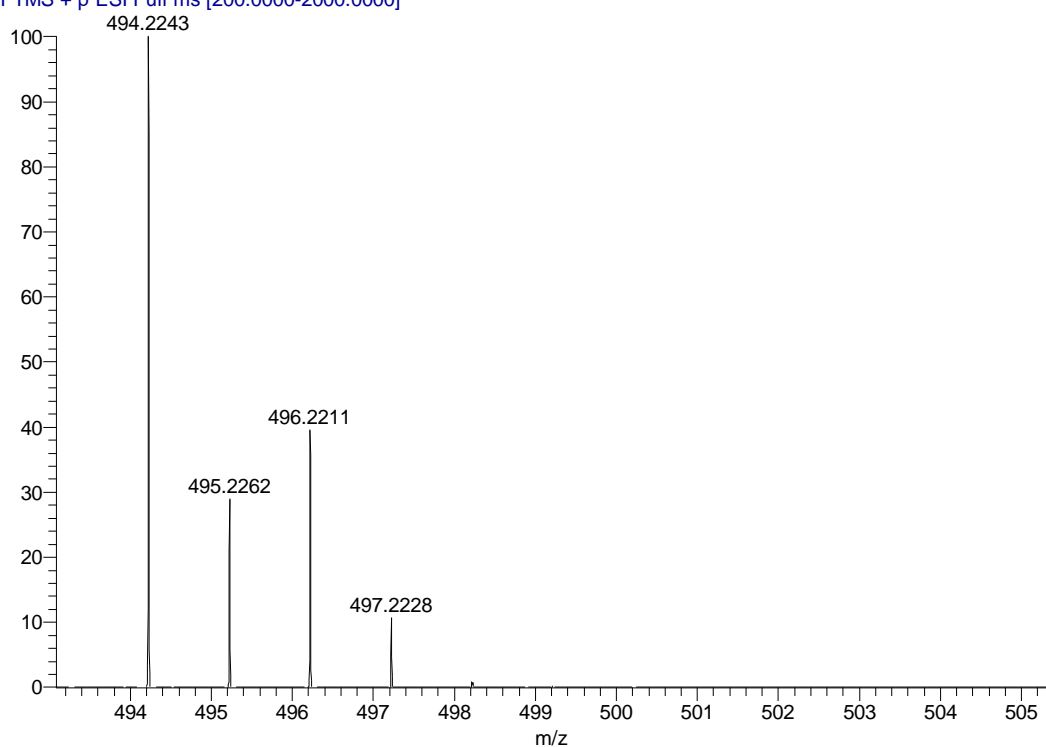

**Figure S15.** HRMS spectrum of **4a**.

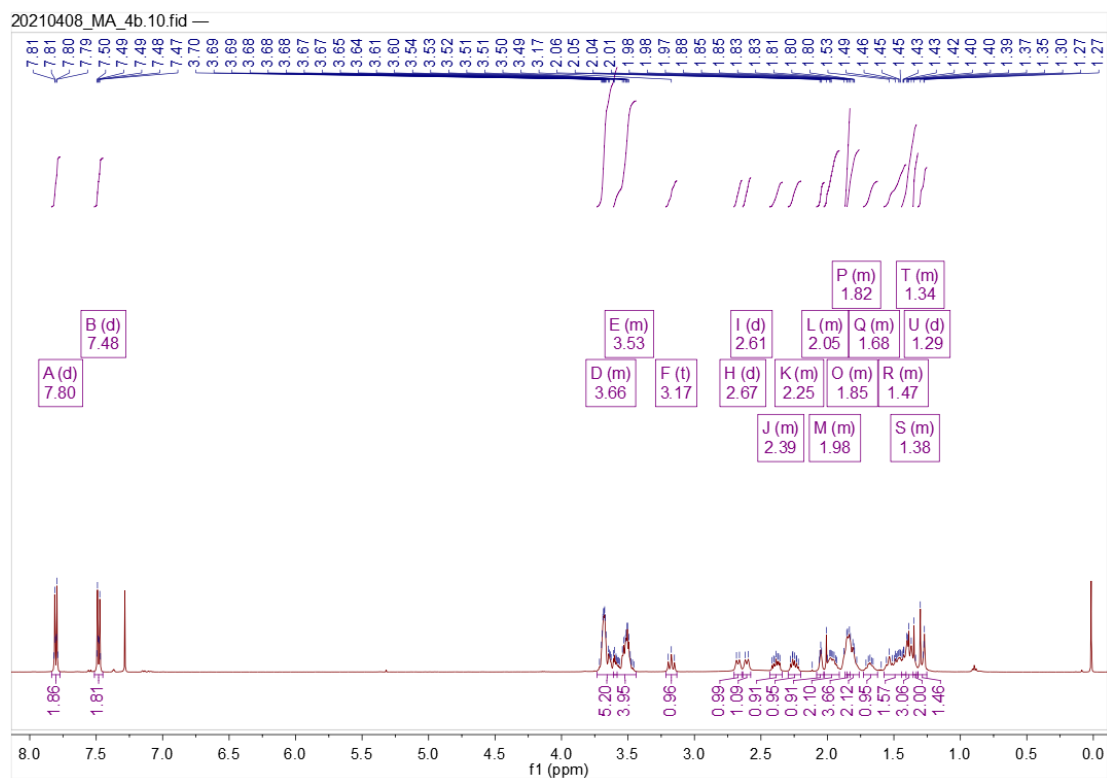

**Figure S16.** <sup>1</sup>H NMR spectrum (Chloroform-*d*, 500 MHz) of **4b**.

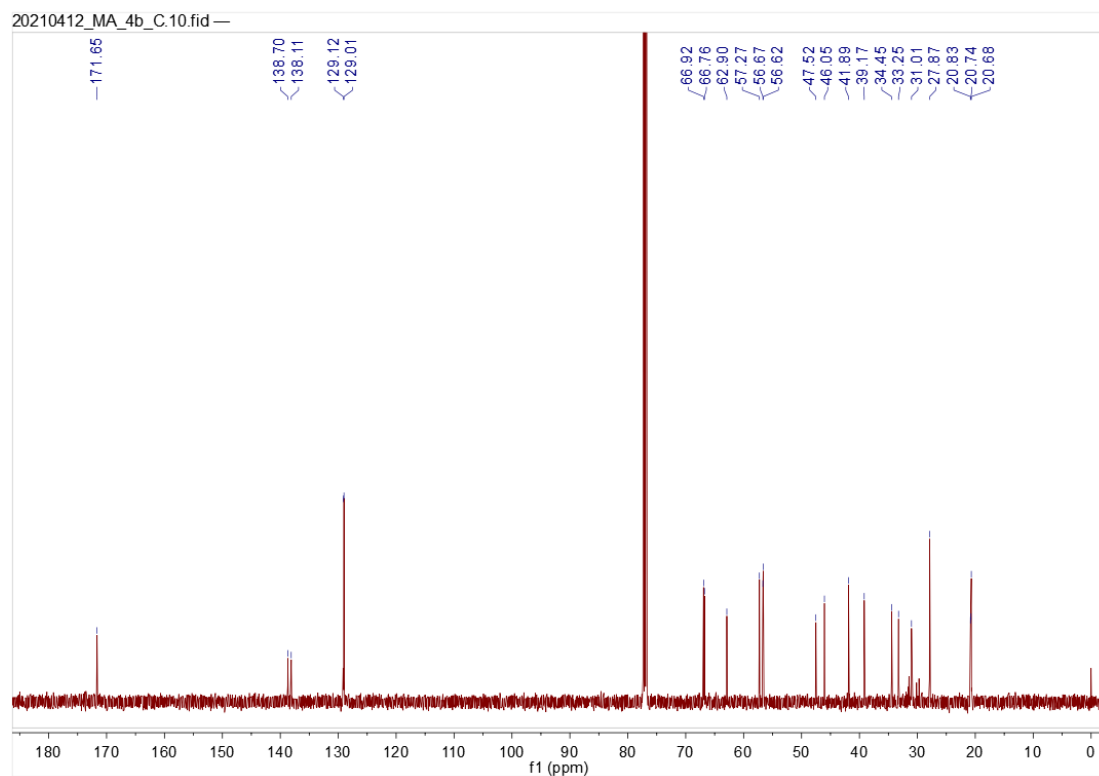

**Figure S17.**  $^{13}\text{C}$  NMR spectrum (Chloroform- $d$ , 126 MHz) of **4b**.

MA\_4b #2989 RT: 8.66 AV: 1 NL: 1.43E8  
T: FTMS + p ESI Full ms [200.0000-2000.0

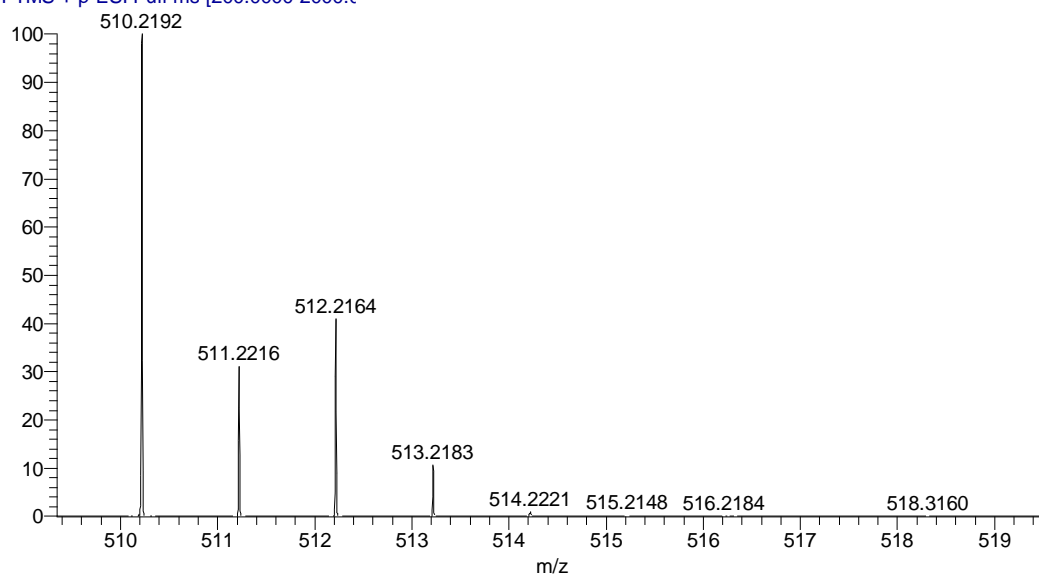

**Figure S18.** HRMS spectrum of **4b**.



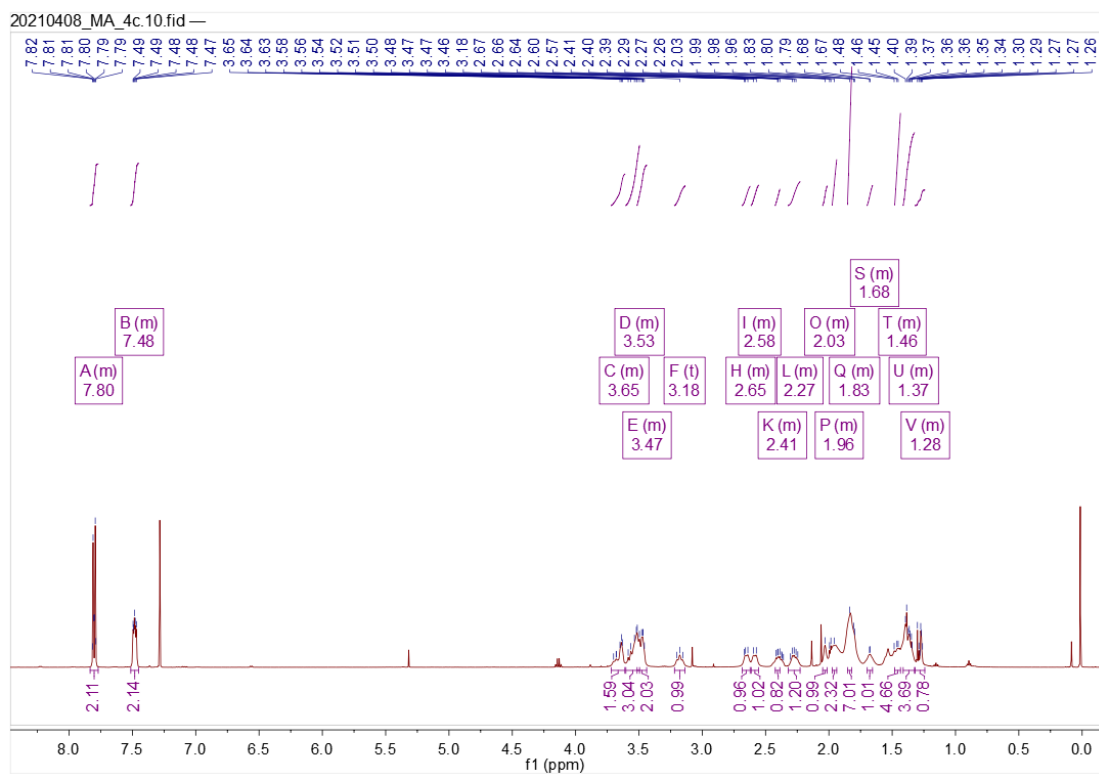

**Figure S19.**  $^1\text{H}$  NMR spectrum (Chloroform-*d*, 500 MHz) of **4c**.

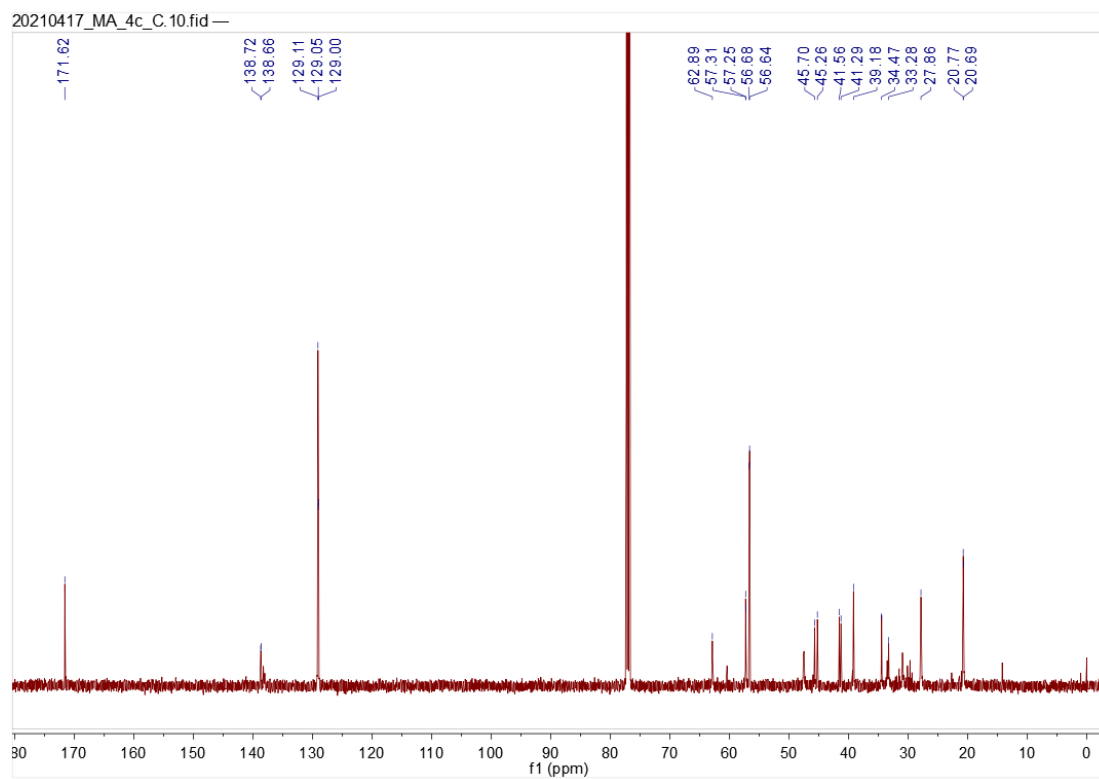

**Figure S20.**  $^{13}\text{C}$  NMR spectrum (Chloroform-*d*, 126 MHz) of **4c**.

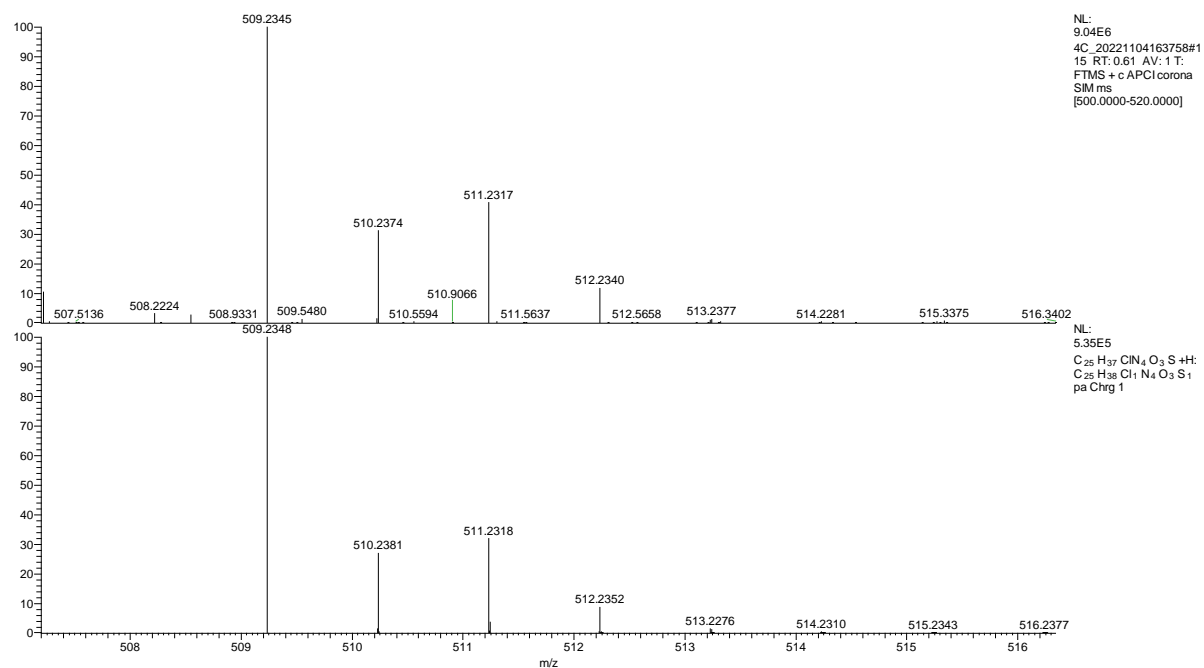

**Figure S21.** HRMS spectrum of **4c**.

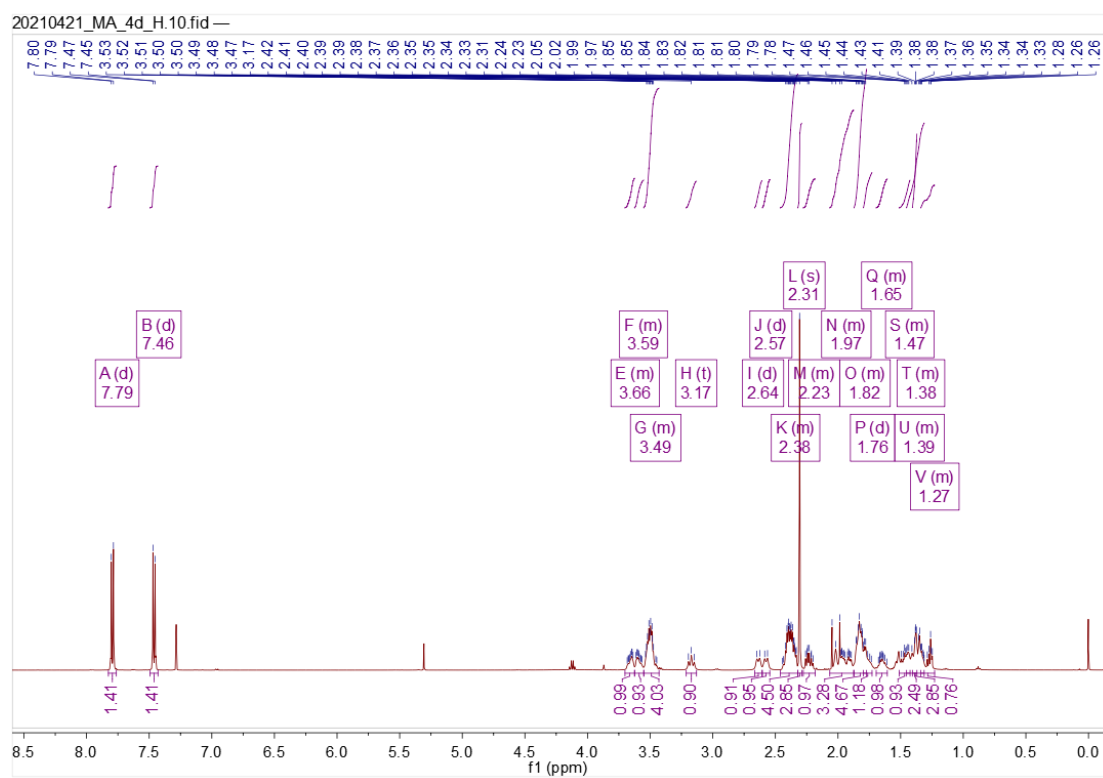

**Figure S22.**  $^1H$  NMR spectrum (Chloroform- $d$ , 500 MHz) of **4d**.

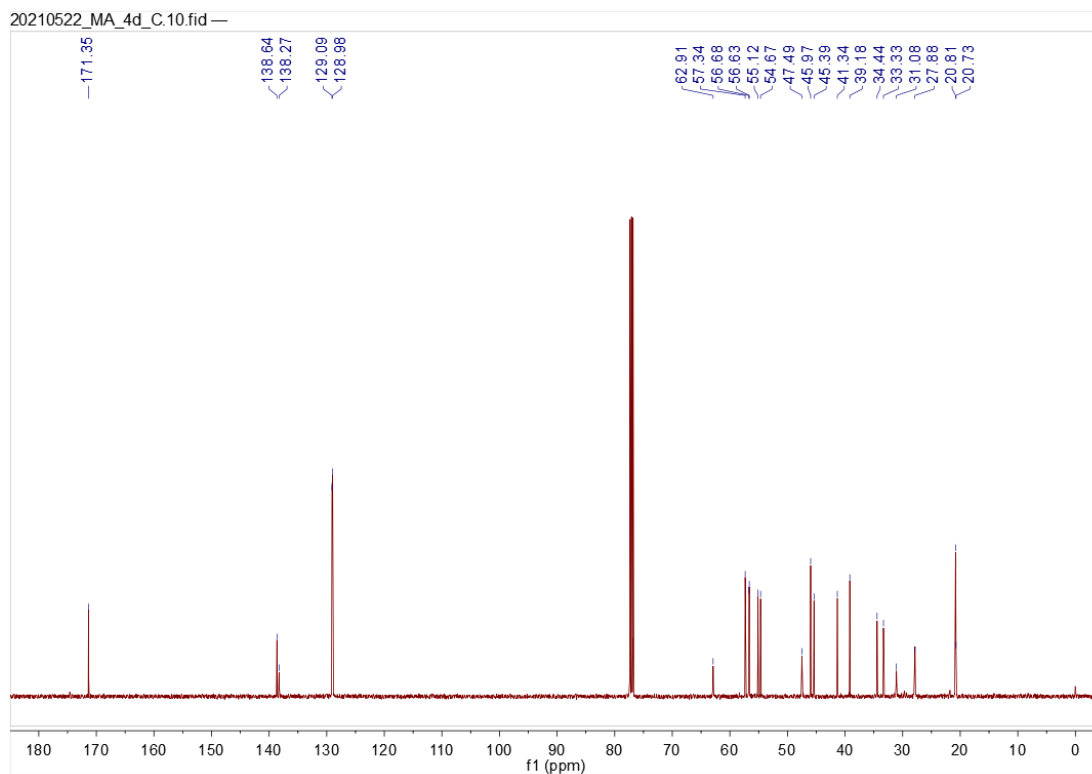

**Figure S23.**  $^{13}\text{C}$  NMR spectrum (Chloroform-*d*, 126 MHz) of **4d**.

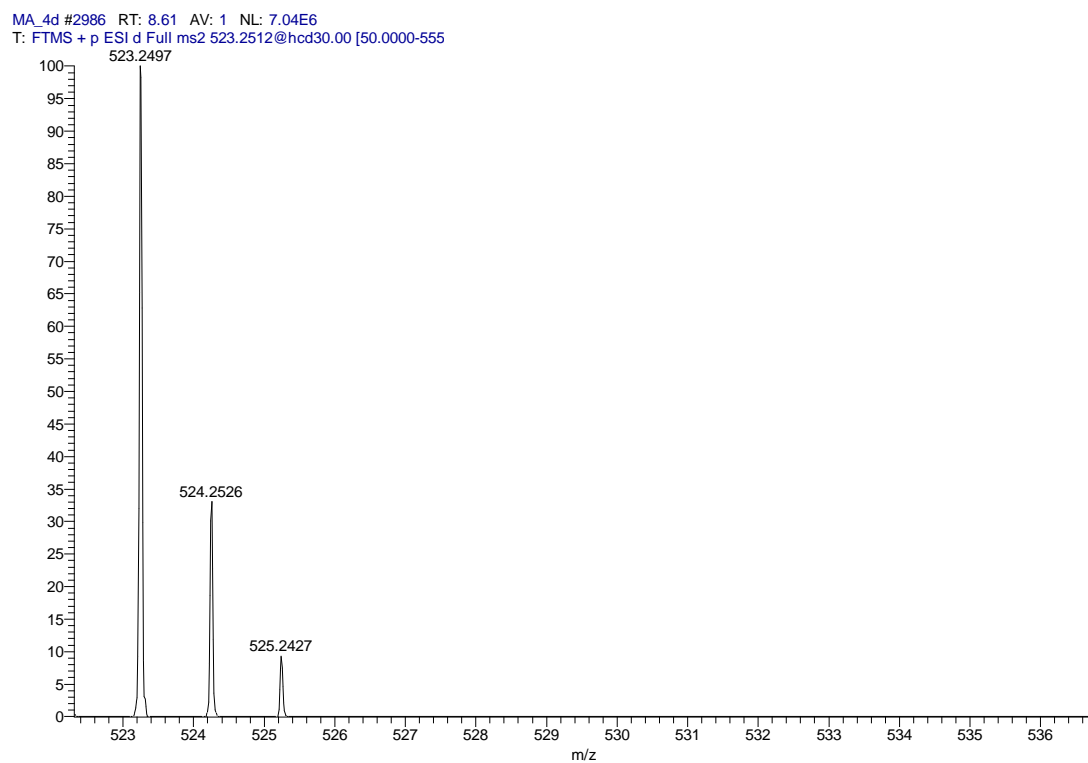

**Figure S24.** HRMS spectrum of **4d**.

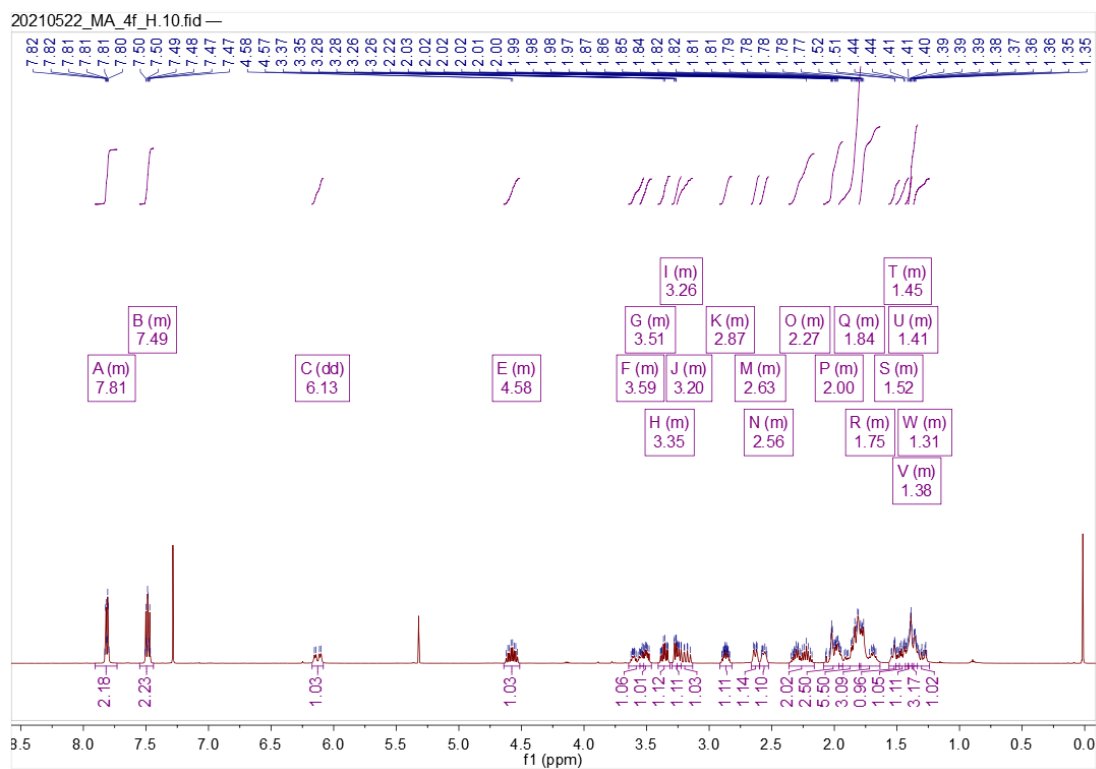

**Figure S25.**  $^1\text{H}$  NMR spectrum (Chloroform- $d$ , 500 MHz) of **4e**.

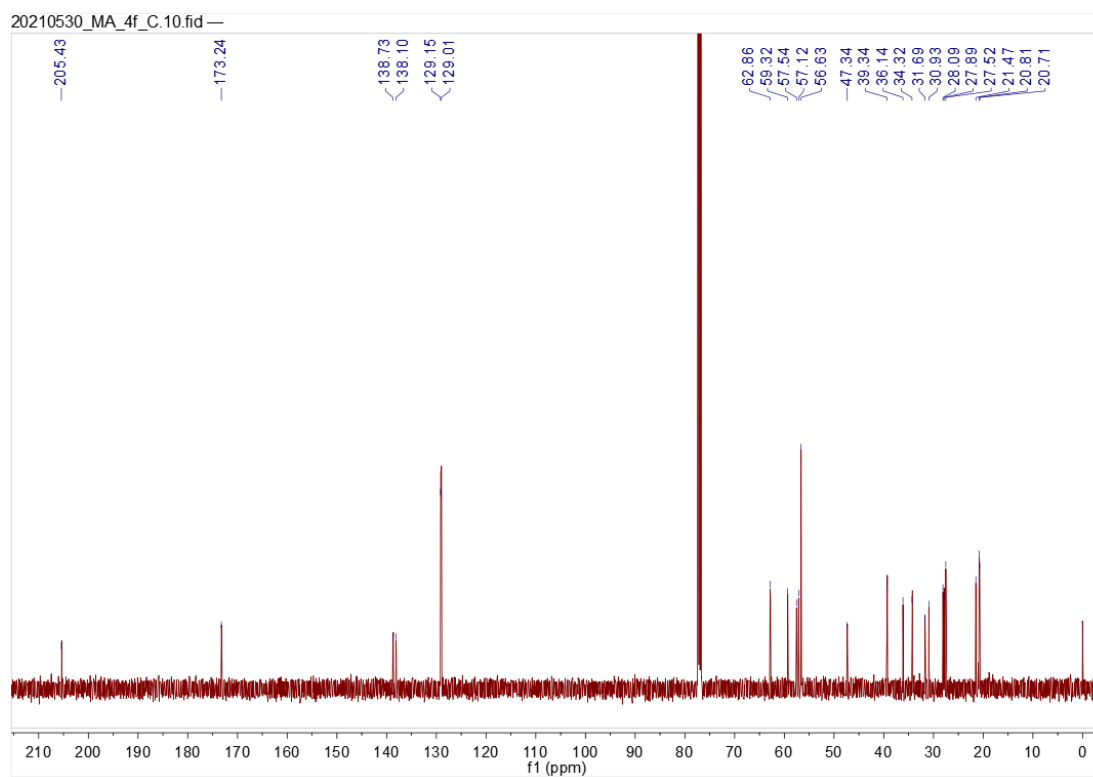

**Figure S26.**  $^{13}\text{C}$  NMR spectrum (Chloroform- $d$ , 126 MHz) of **4e**.

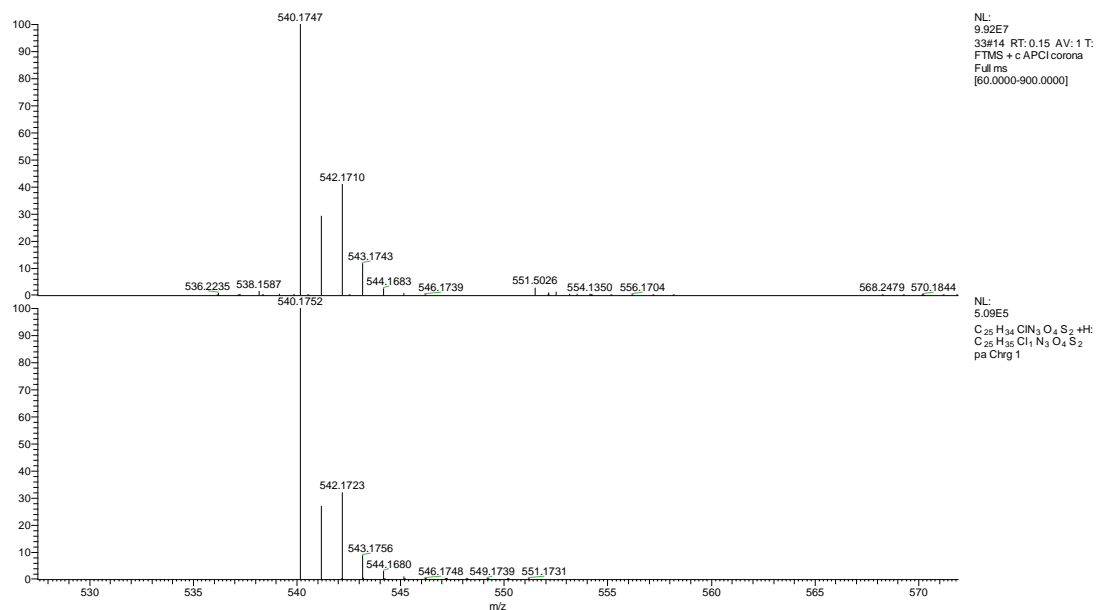

**Figure S27.** HRMS spectrum of **4e**.

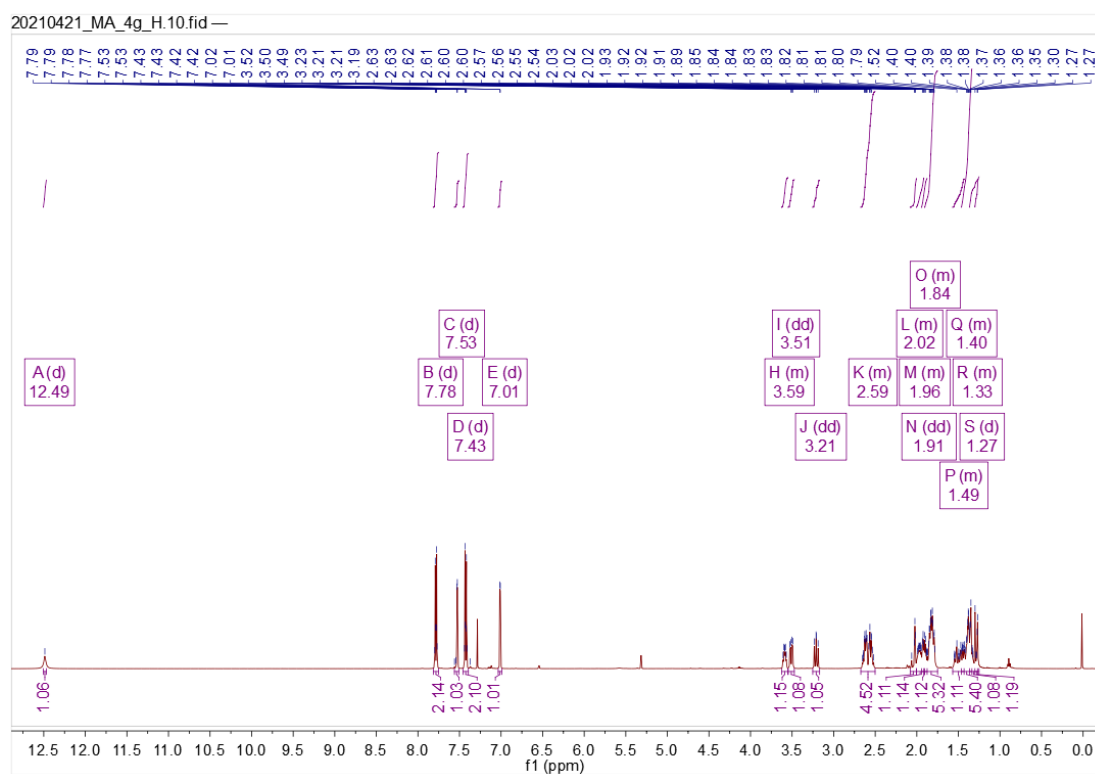

**Figure S28.** <sup>1</sup>H NMR spectrum (Chloroform-*d*, 500 MHz) of **4f**.

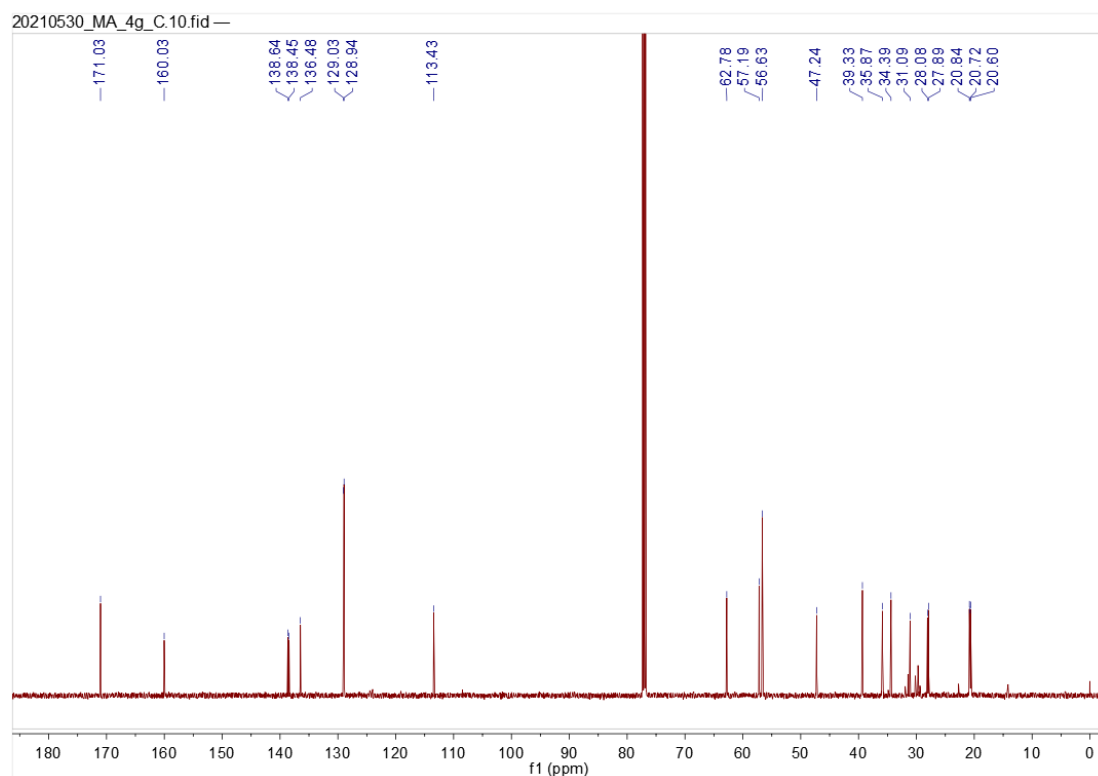

**Figure S29.**  $^{13}\text{C}$  NMR spectrum (Chloroform- $d$ , 126 MHz) of **4f**.

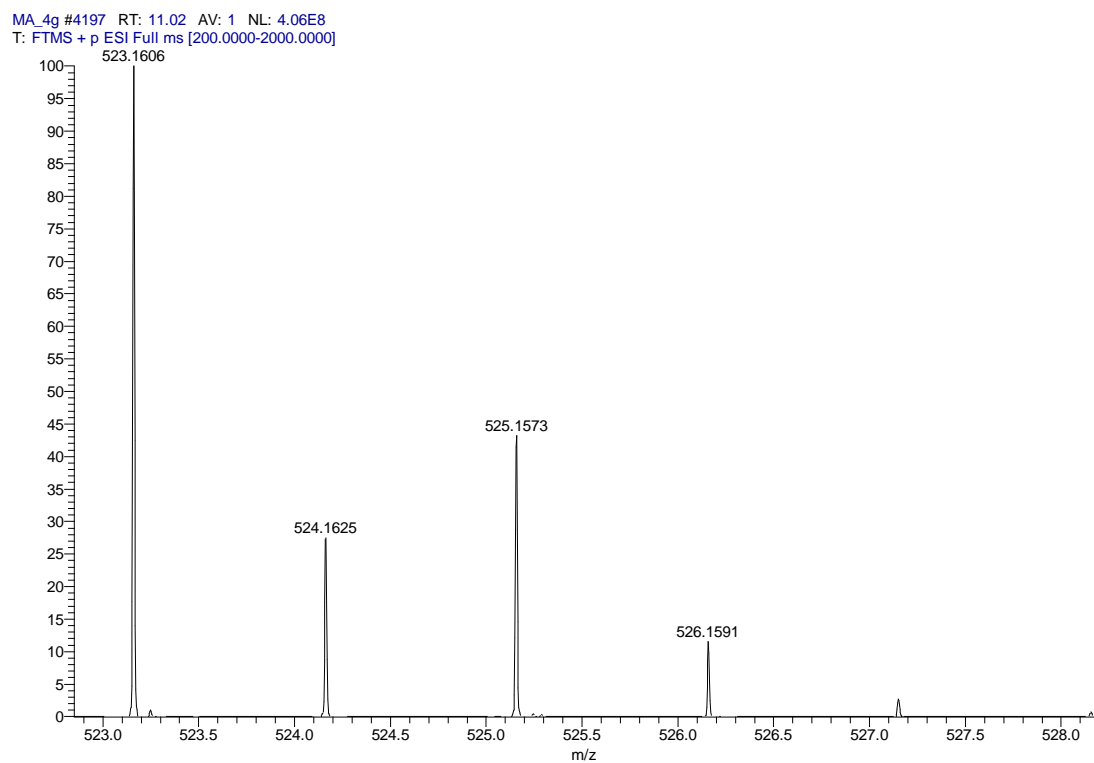

**Figure S30.** HRMS spectrum of **4f**.

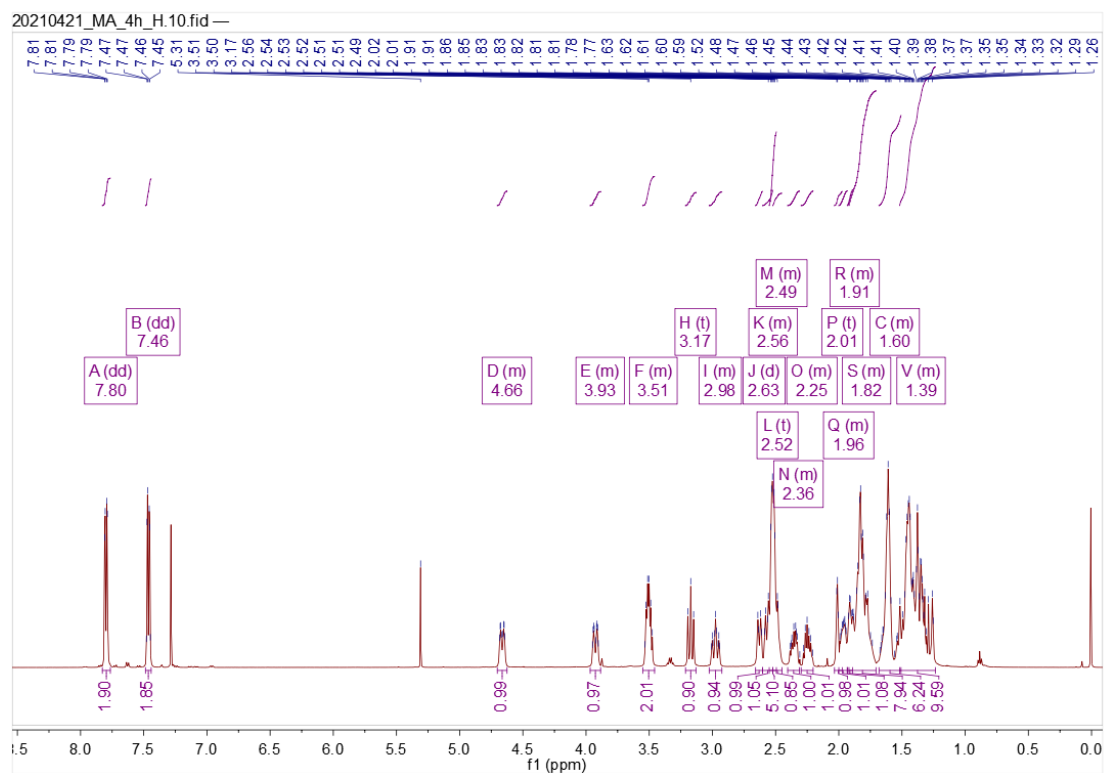

**Figure S31.**  $^1\text{H}$  NMR spectrum (Chloroform- $d$ , 500 MHz) of **4g**.

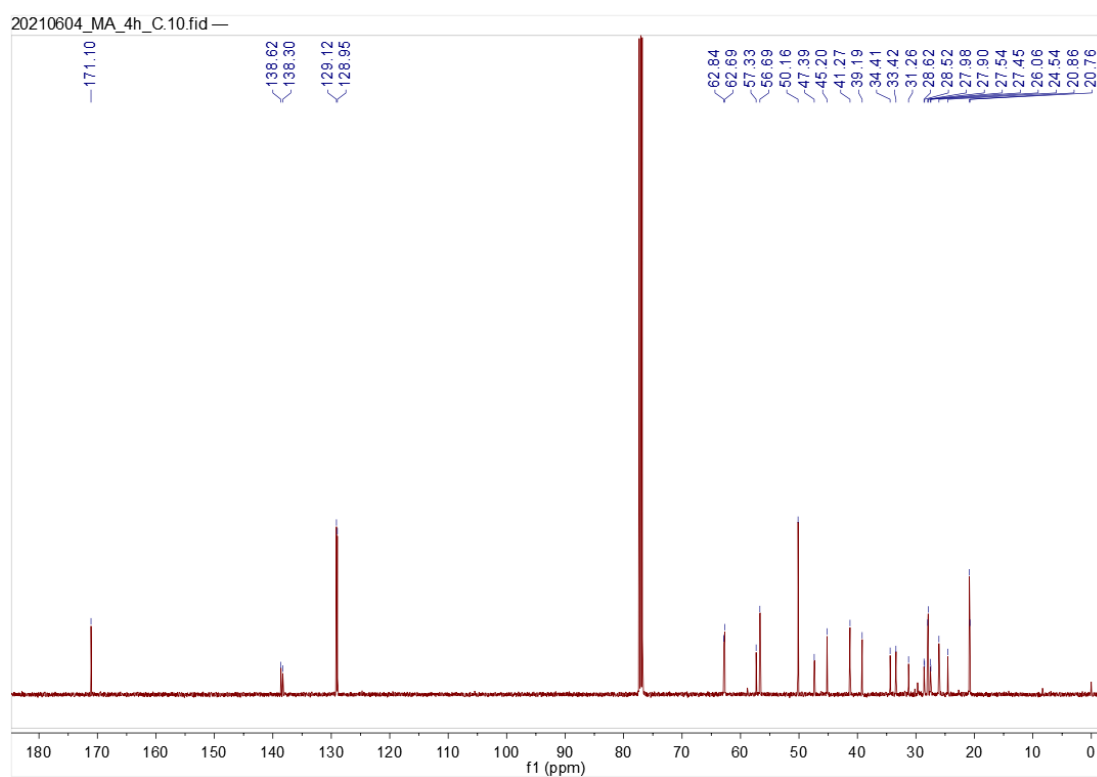

**Figure S32.**  $^{13}\text{C}$  NMR spectrum (Chloroform- $d$ , 126 MHz) of **4g**.

MA\_4h #3692 RT: 10.01 AV: 1 NL: 2.69E6  
T: FTMS + p ESI d Full ms2 591.3137@hcd30.00 [50.0000-625]

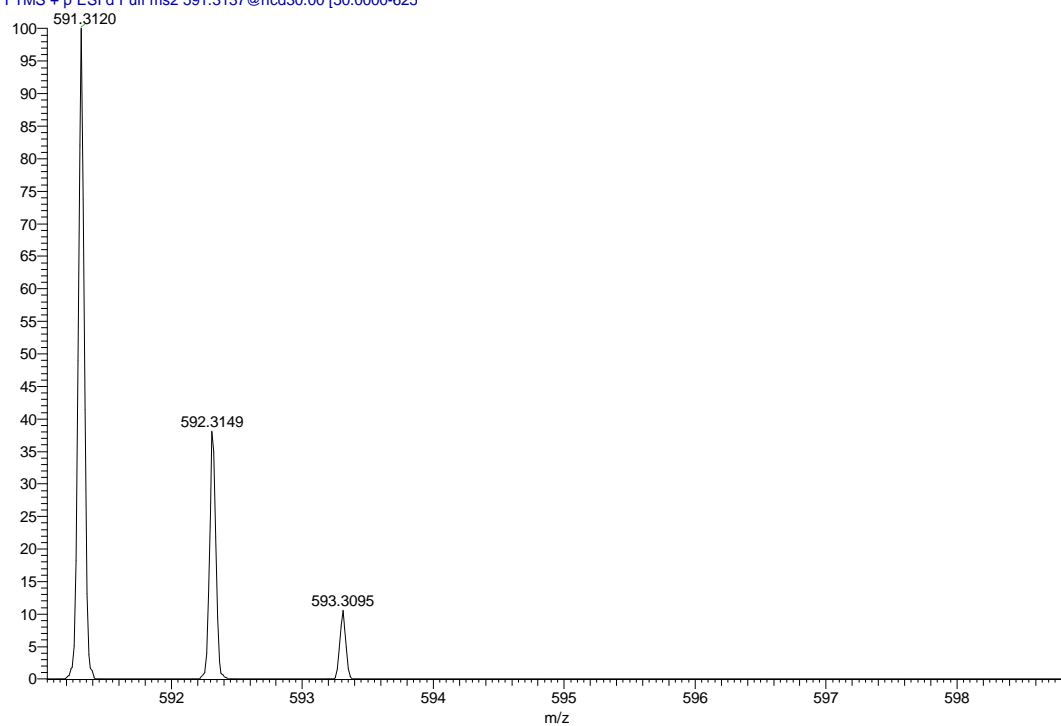

**Figure S33.** HRMS spectrum of **4g**.

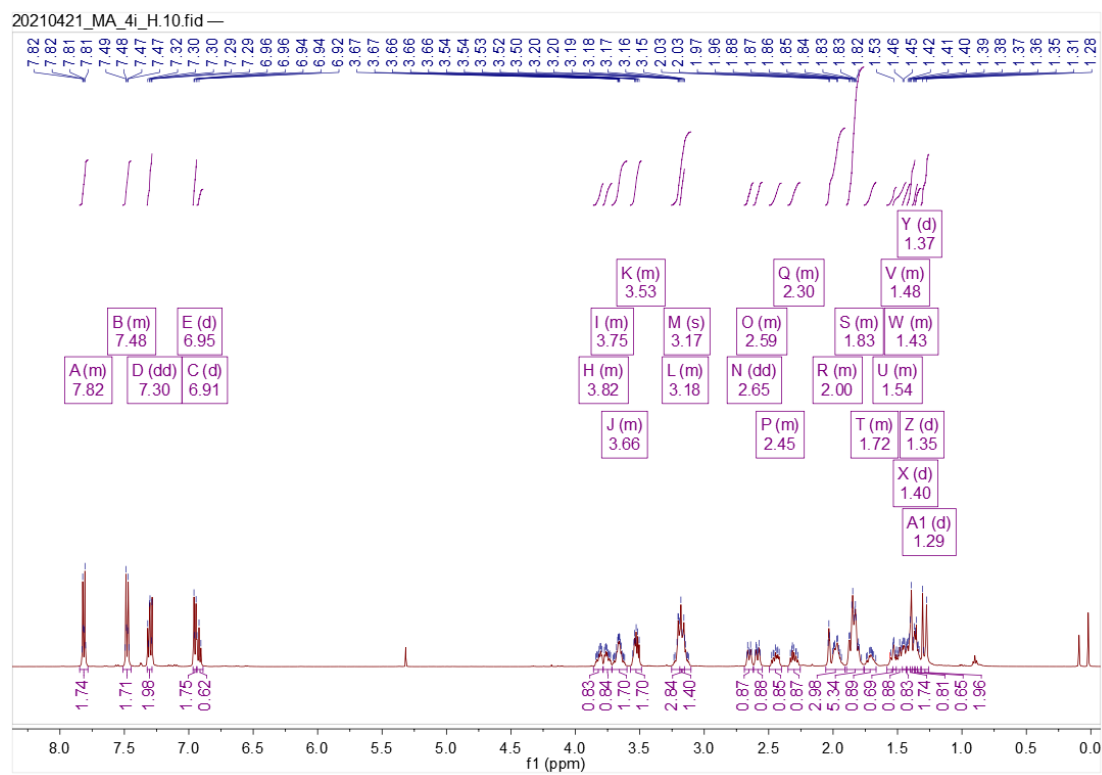

**Figure S34.** <sup>1</sup>H NMR spectrum (Chloroform-d, 500 MHz) of **4h**.



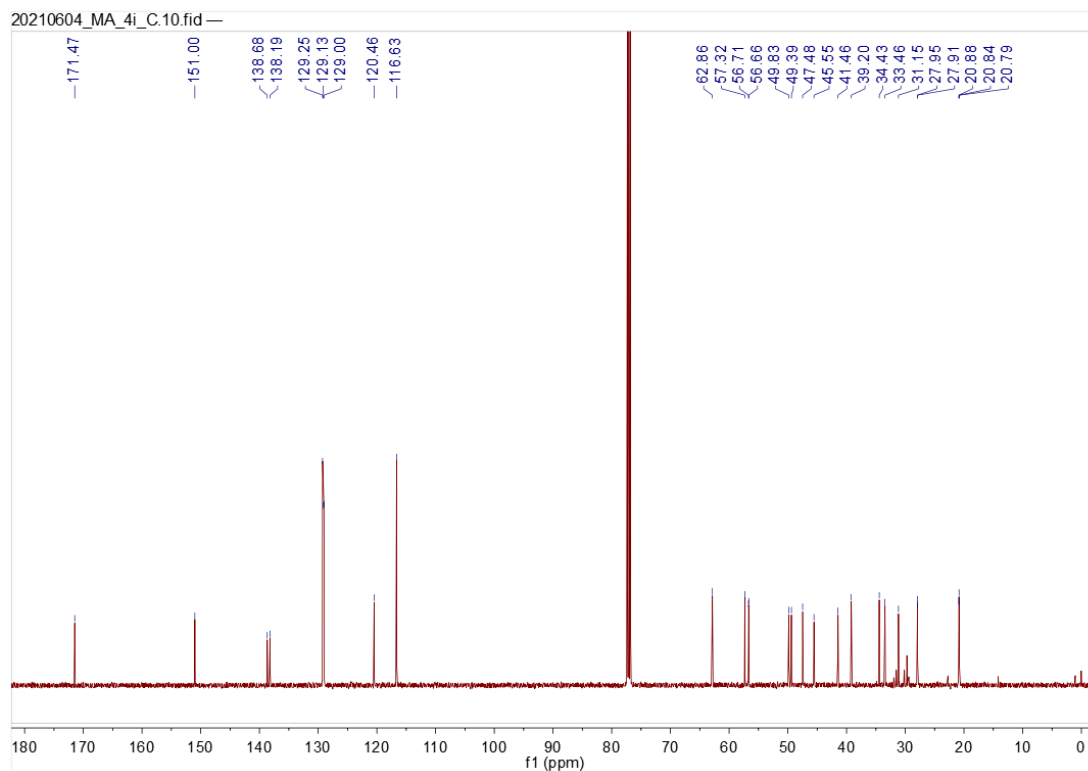

**Figure S35.**  $^{13}\text{C}$  NMR spectrum (Chloroform-*d*, 126 MHz) of **4h**.

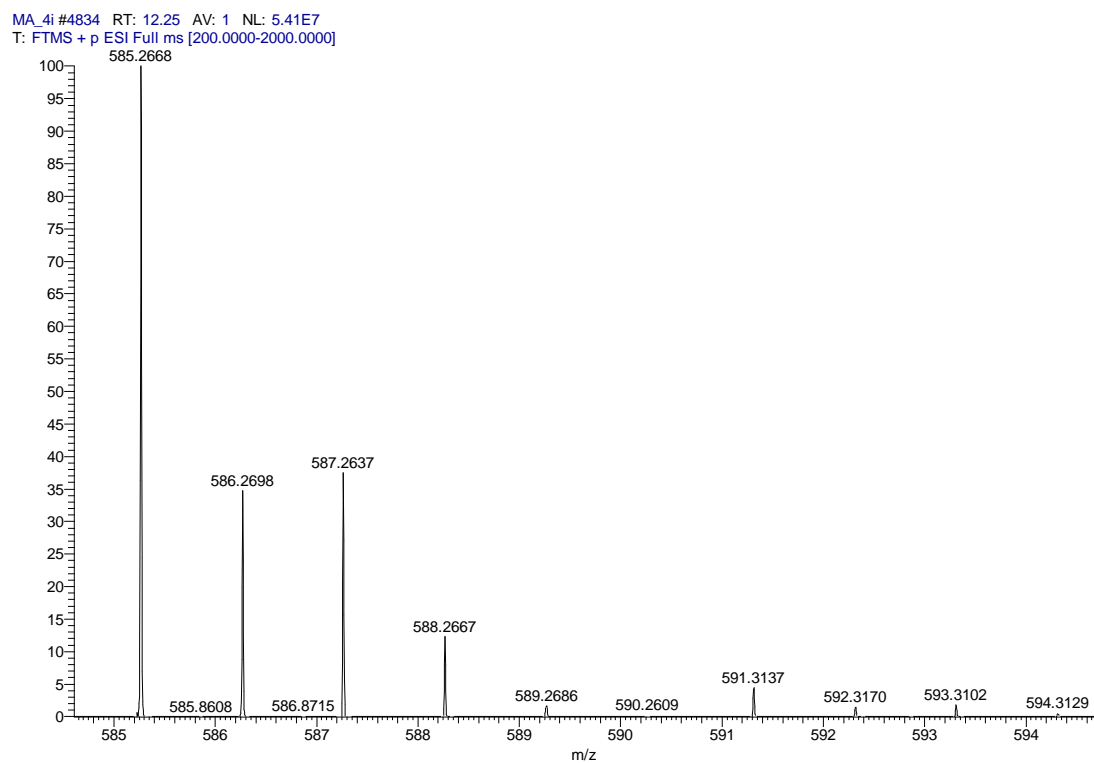

**Figure S36.** HRMS spectrum of **4h**.

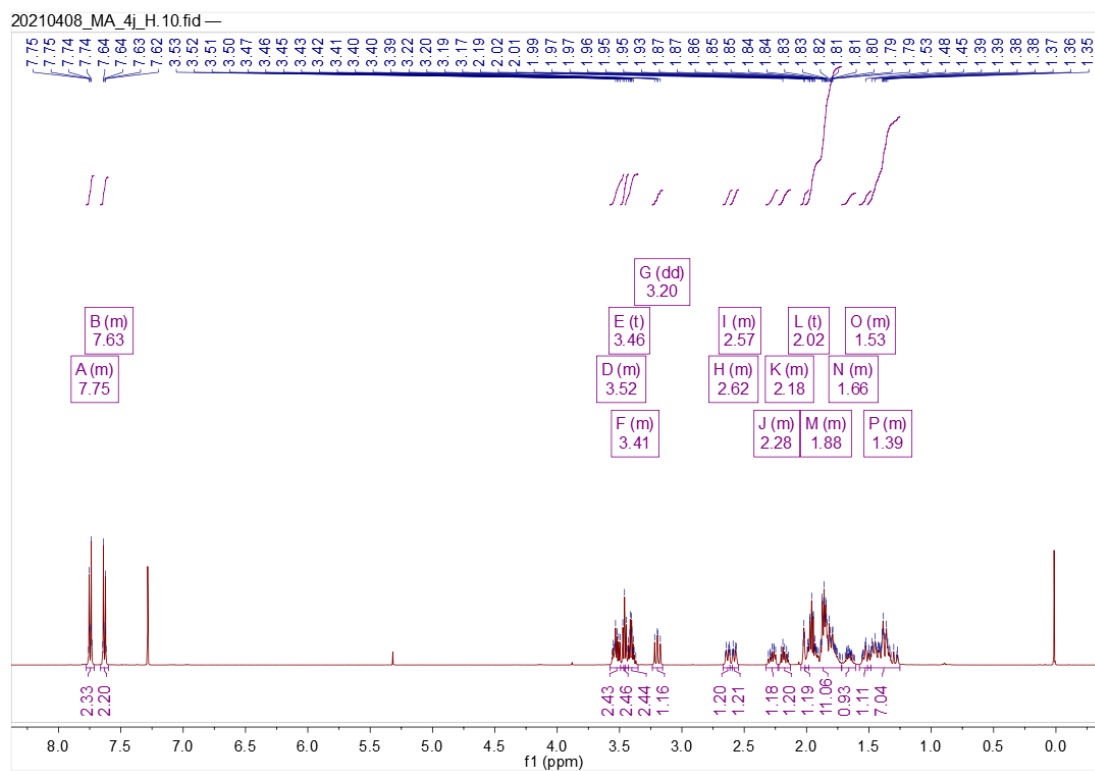

**Figure S37.**  $^1\text{H}$  NMR spectrum (Chloroform-*d*, 500 MHz) of **4i**.

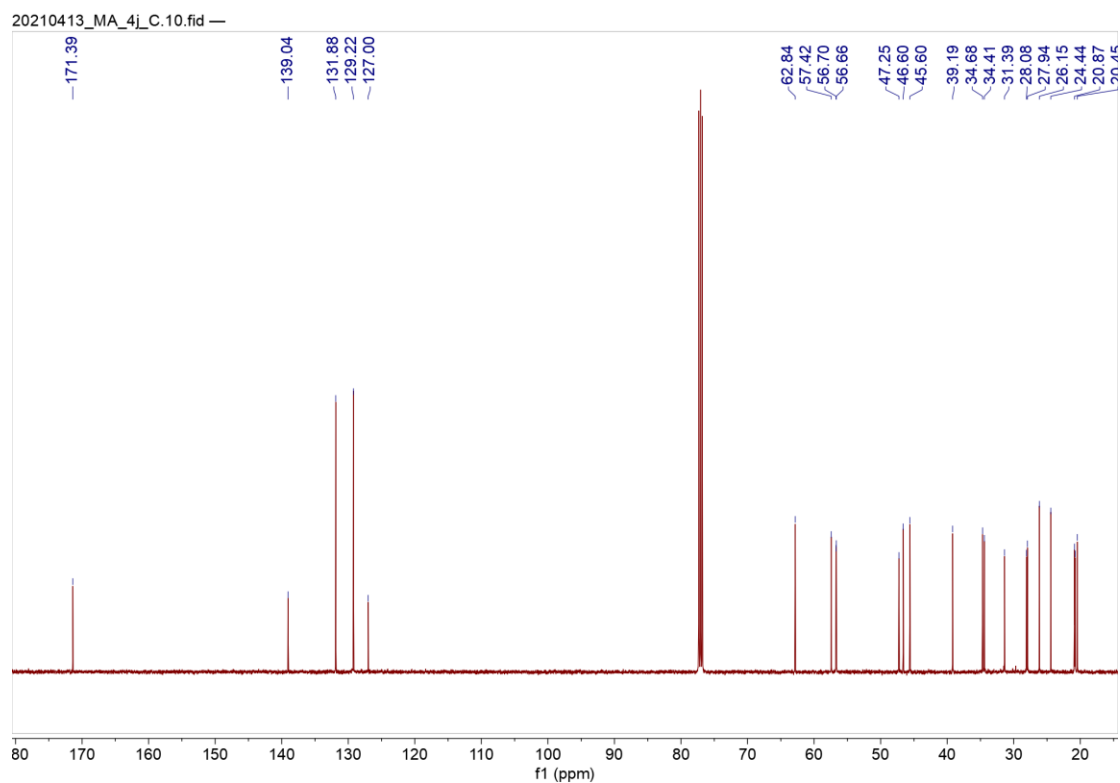

**Figure S38.**  $^{13}\text{C}$  NMR spectrum (Chloroform-*d*, 126 MHz) of **4i**.

MA\_4j #3766 RT: 10.18 AV: 1 NL: 8.76E7  
T: FTMS + p ESI Full ms [200.0000-2000.0000]

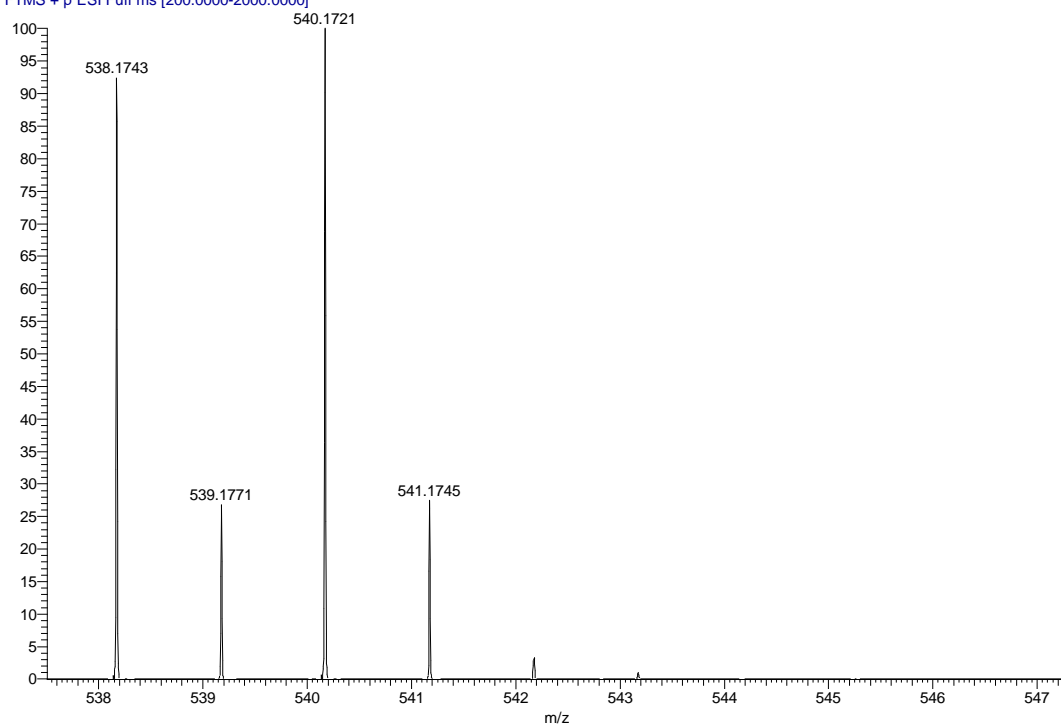

Figure S39. HRMS spectrum of 4i.

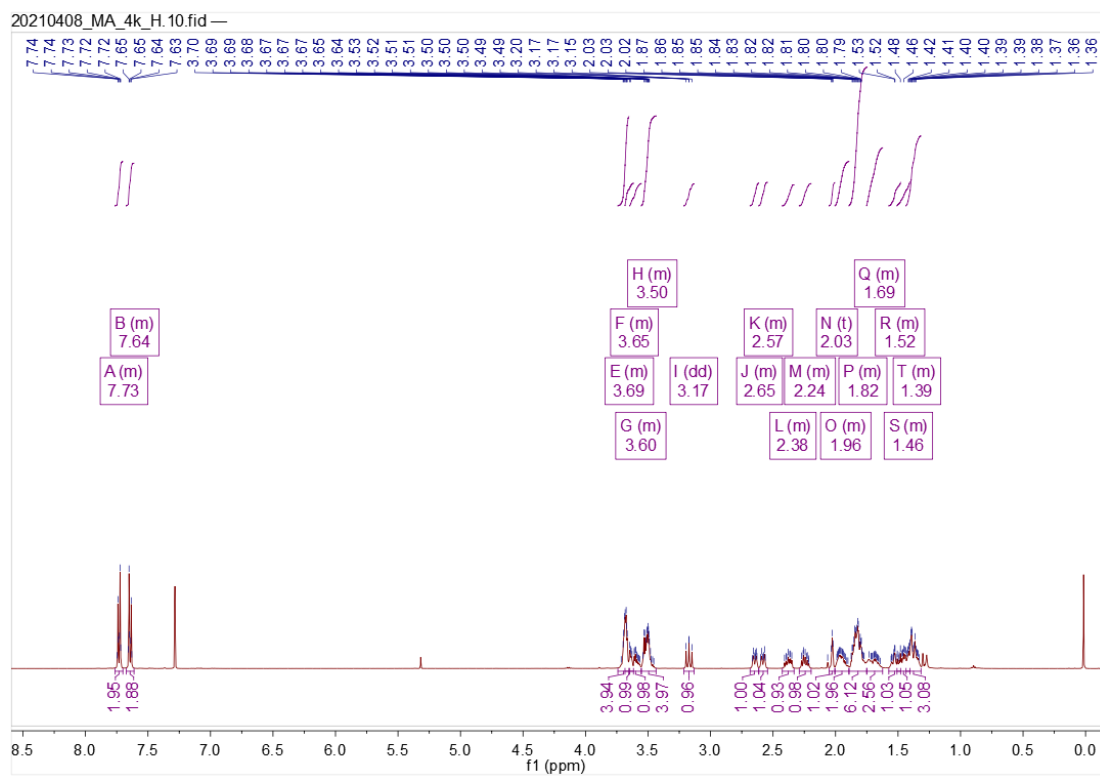

Figure S40. <sup>1</sup>H NMR spectrum (Chloroform-*d*, 500 MHz) of 4j.

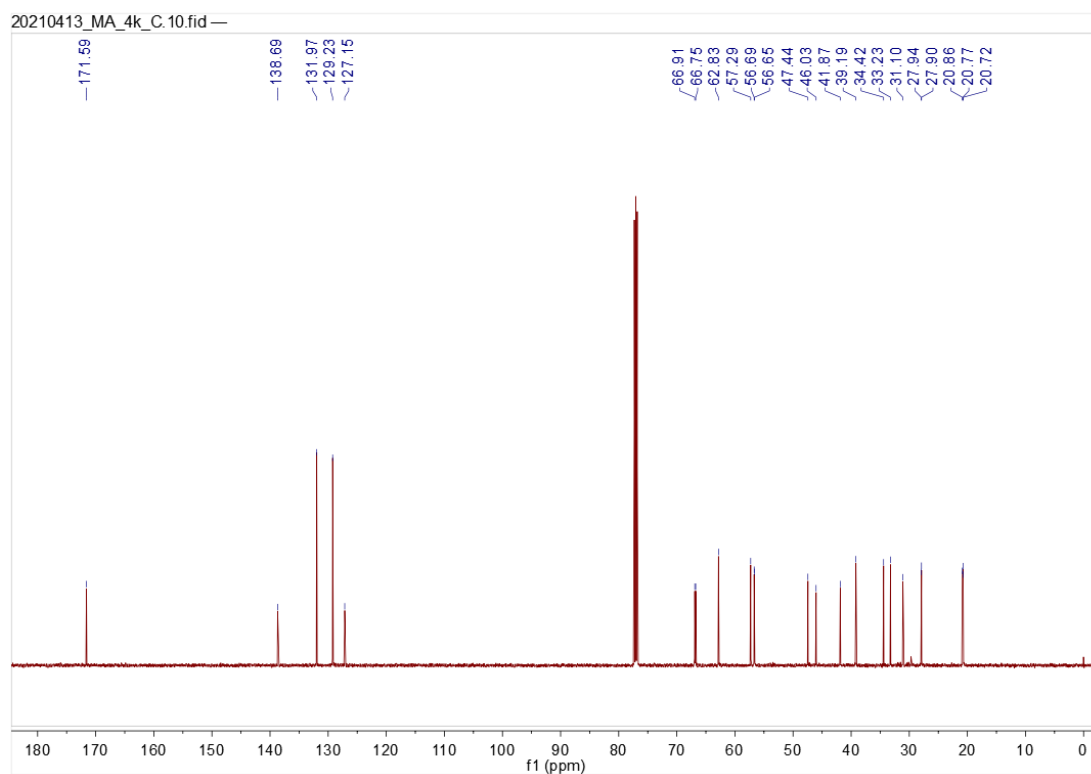

**Figure S41.**  $^{13}\text{C}$  NMR spectrum (Chloroform-*d*, 126 MHz) of **4j**.

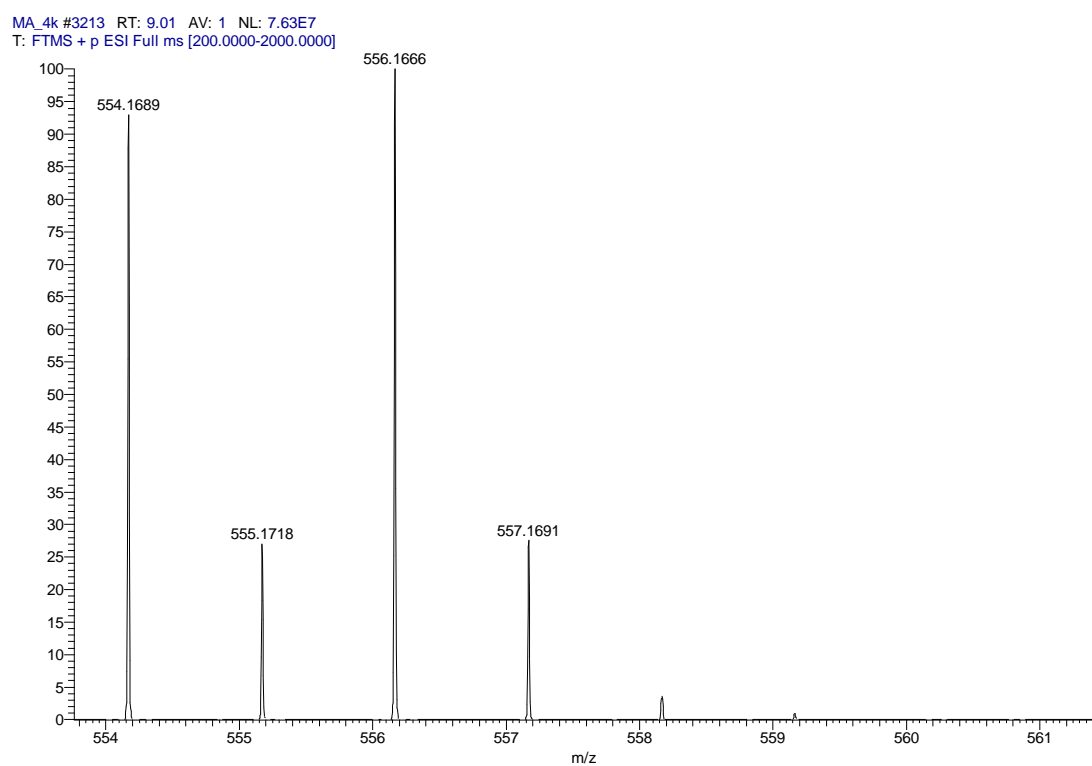

**Figure S42.** HRMS spectrum of **4j**.

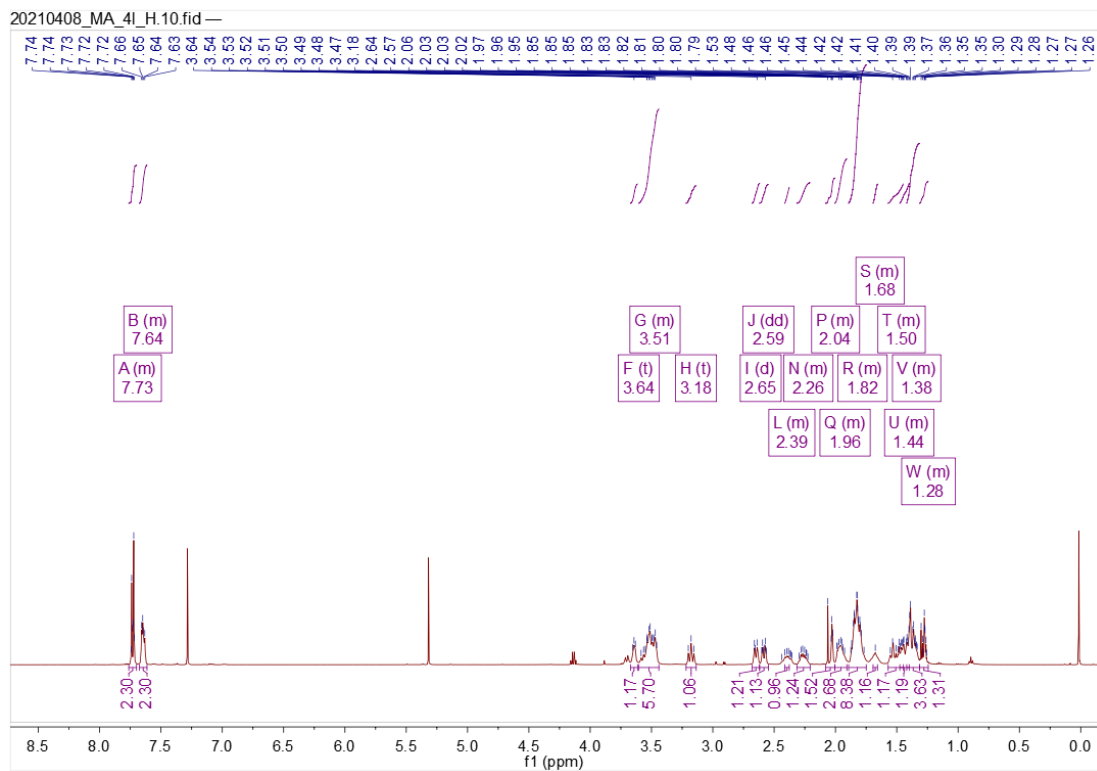

**Figure S43.**  $^1\text{H}$  NMR spectrum (Chloroform- $d$ , 500 MHz) of **4k**.

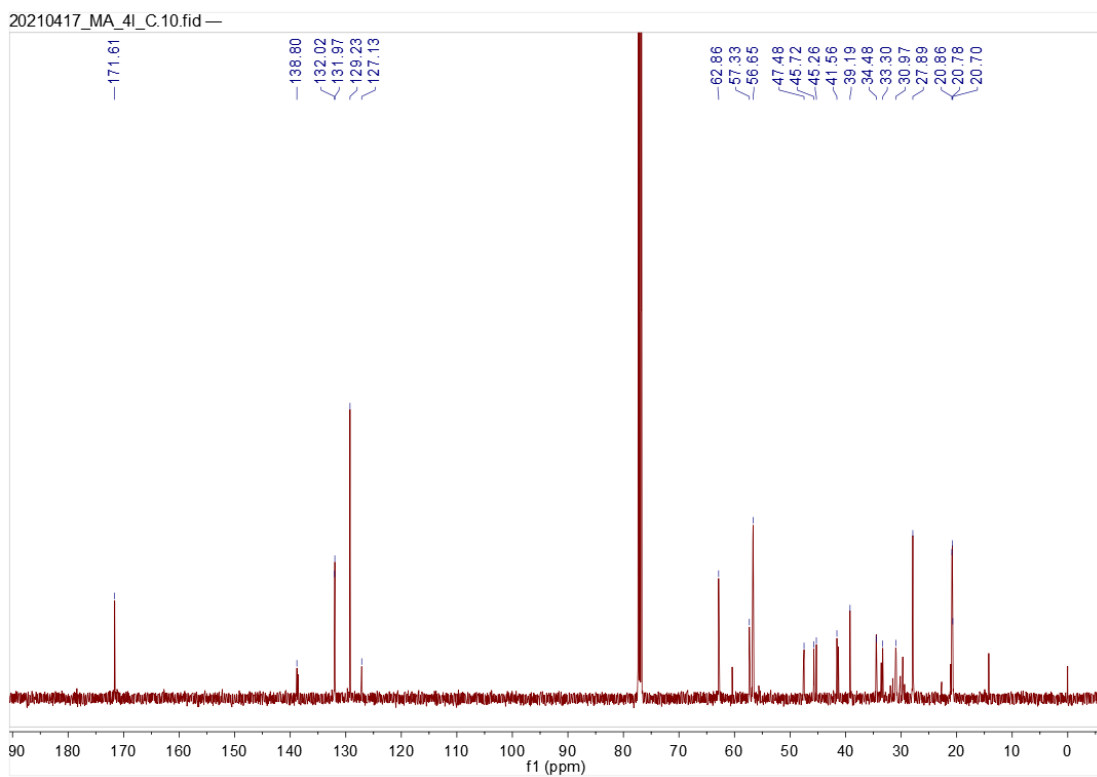

**Figure S44.**  $^{13}\text{C}$  NMR spectrum (Chloroform- $d$ , 126 MHz) of **4k**.

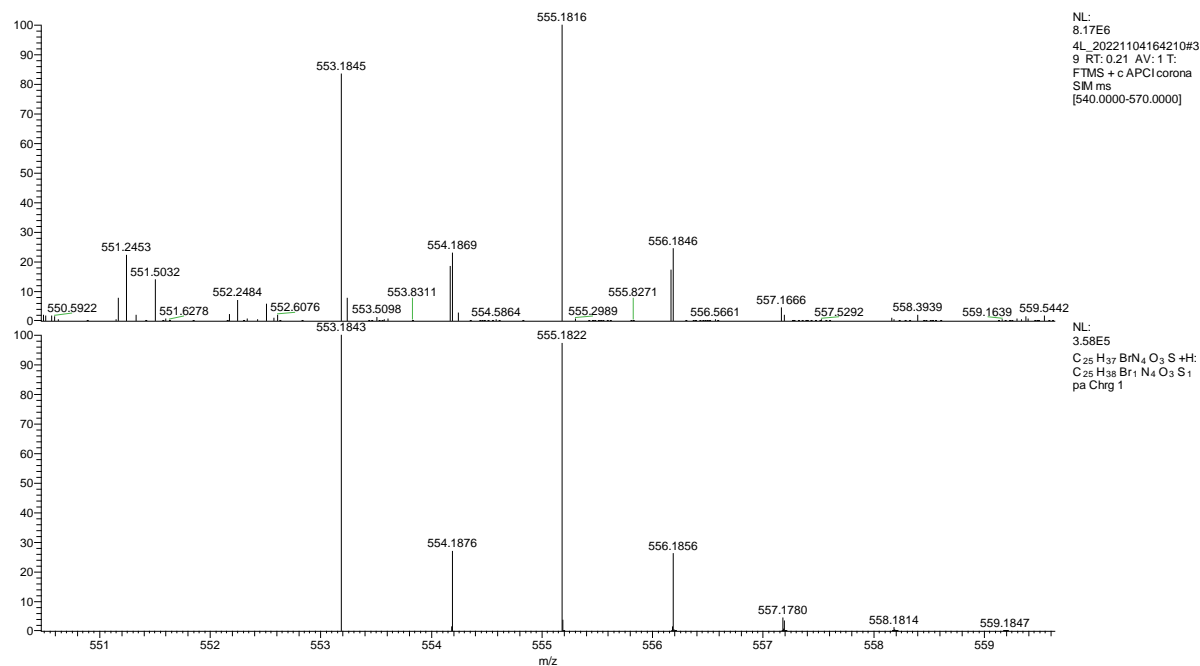

**Figure S45.** HRMS spectrum of **4k**.

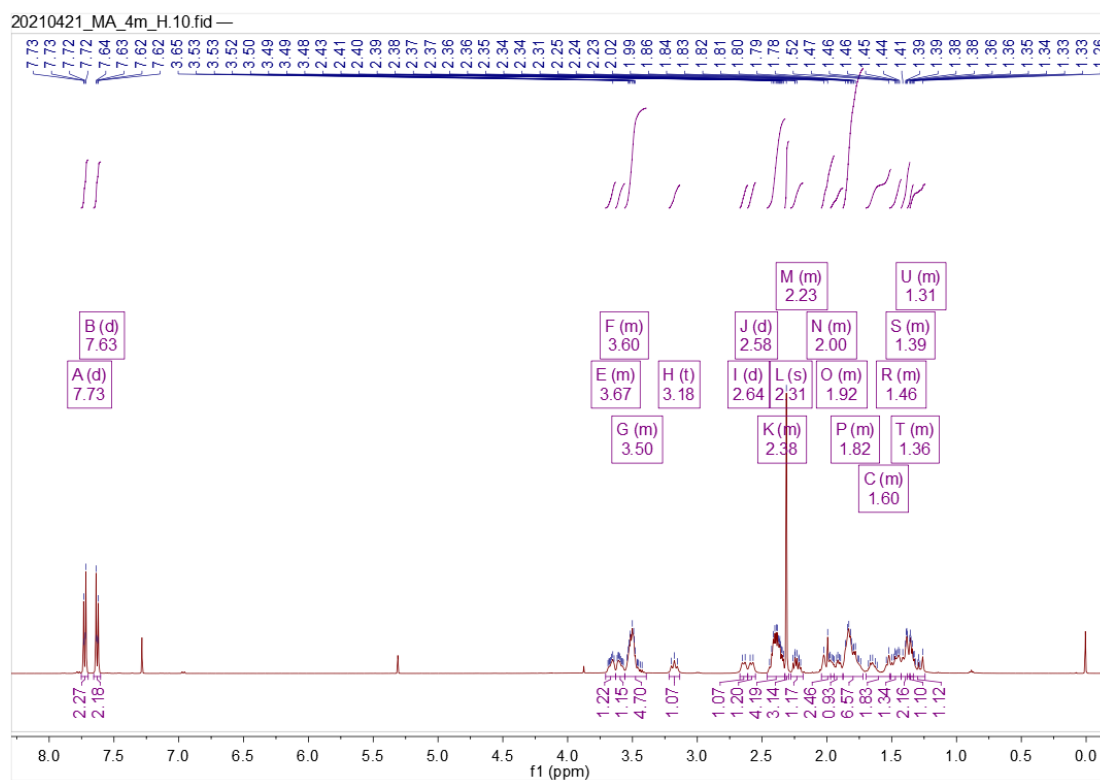

**Figure S46.** <sup>1</sup>H NMR spectrum (Chloroform-*d*, 500 MHz) of **4l**.

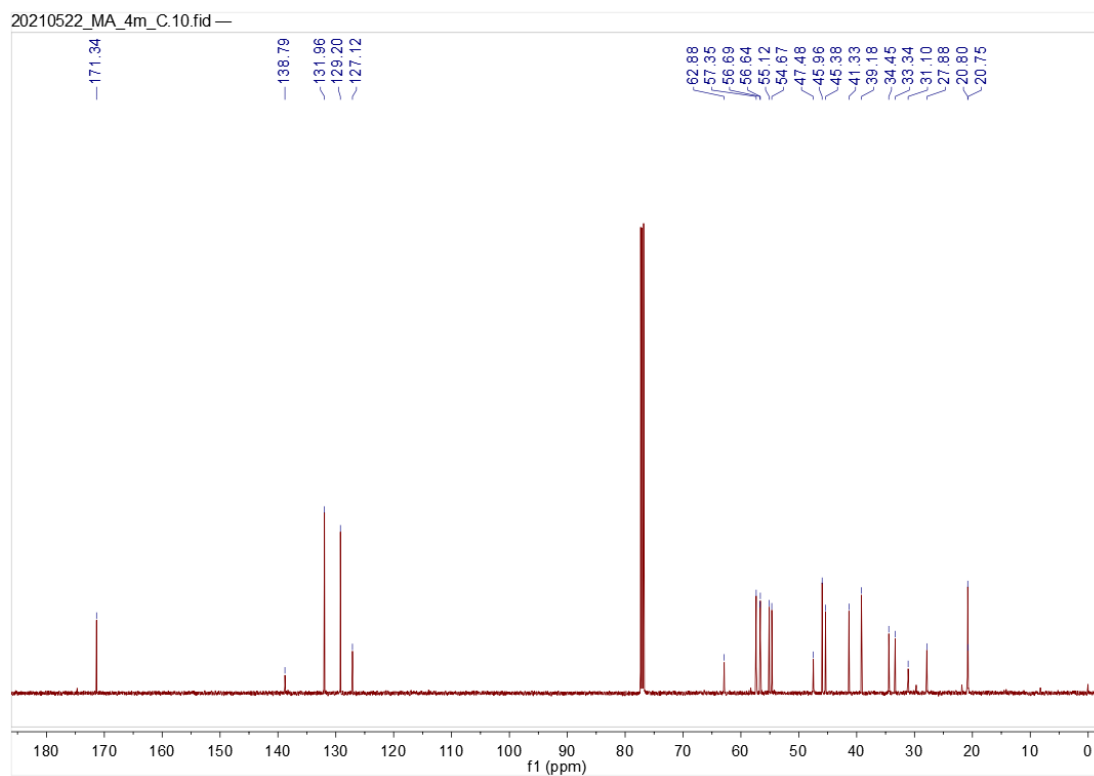

**Figure S47.**  $^{13}\text{C}$  NMR spectrum (Chloroform-*d*, 126 MHz) of **4l**.

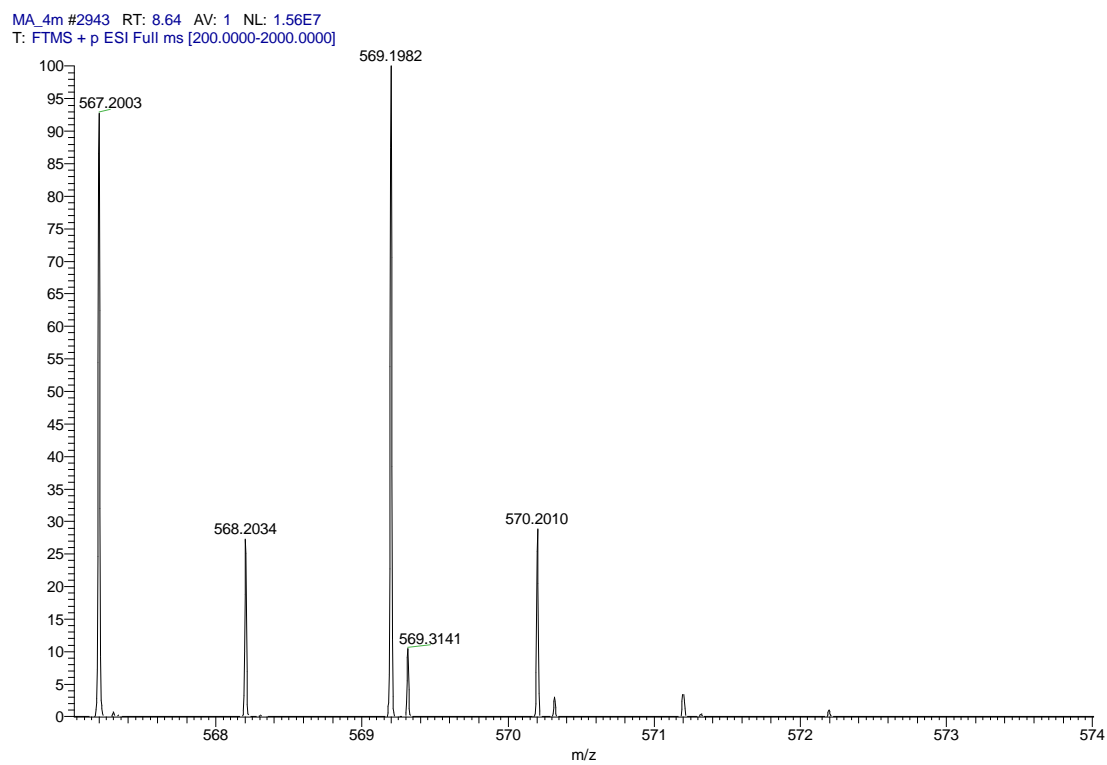

**Figure S48.** HRMS spectrum of **4l**.

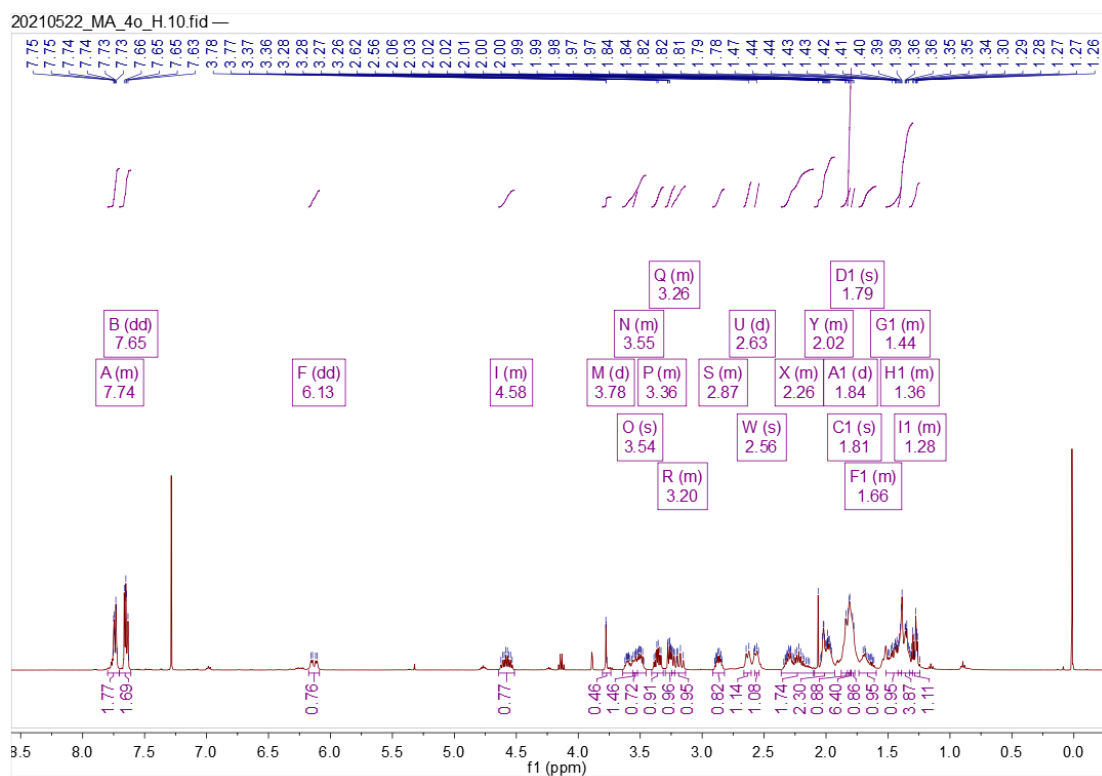

**Figure S49.**  $^1\text{H}$  NMR spectrum (Chloroform- $d$ , 500 MHz) of **4m**.

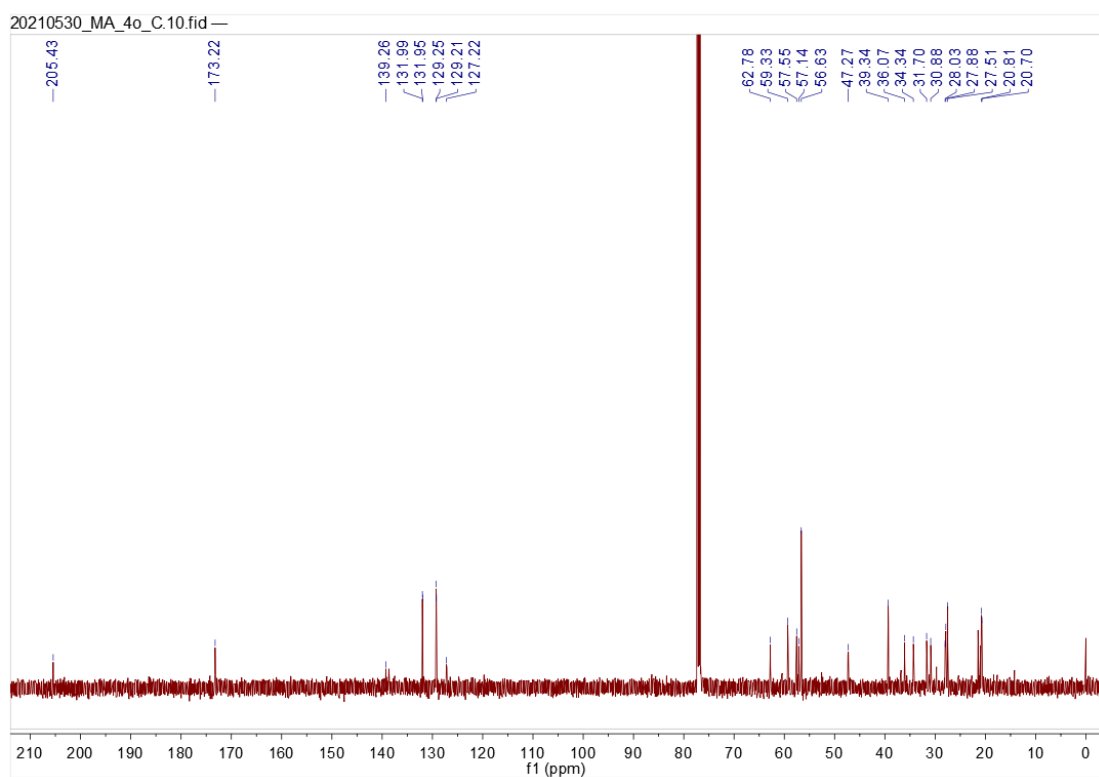

**Figure S50.**  $^{13}\text{C}$  NMR spectrum (Chloroform- $d$ , 126 MHz) of **4m**.



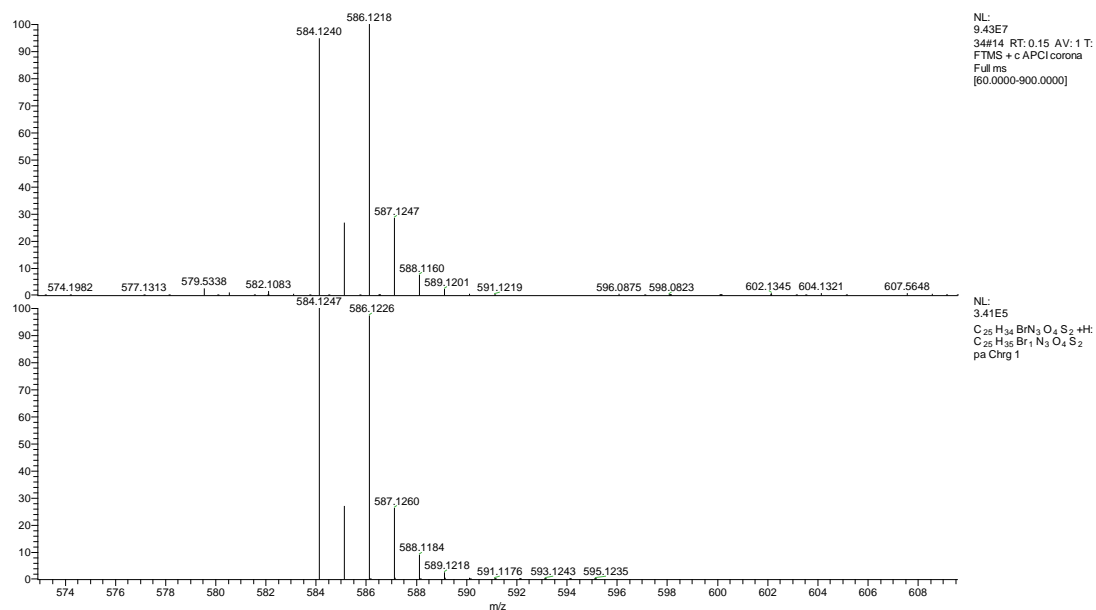

**Figure S51.** HRMS spectrum of **4m**.

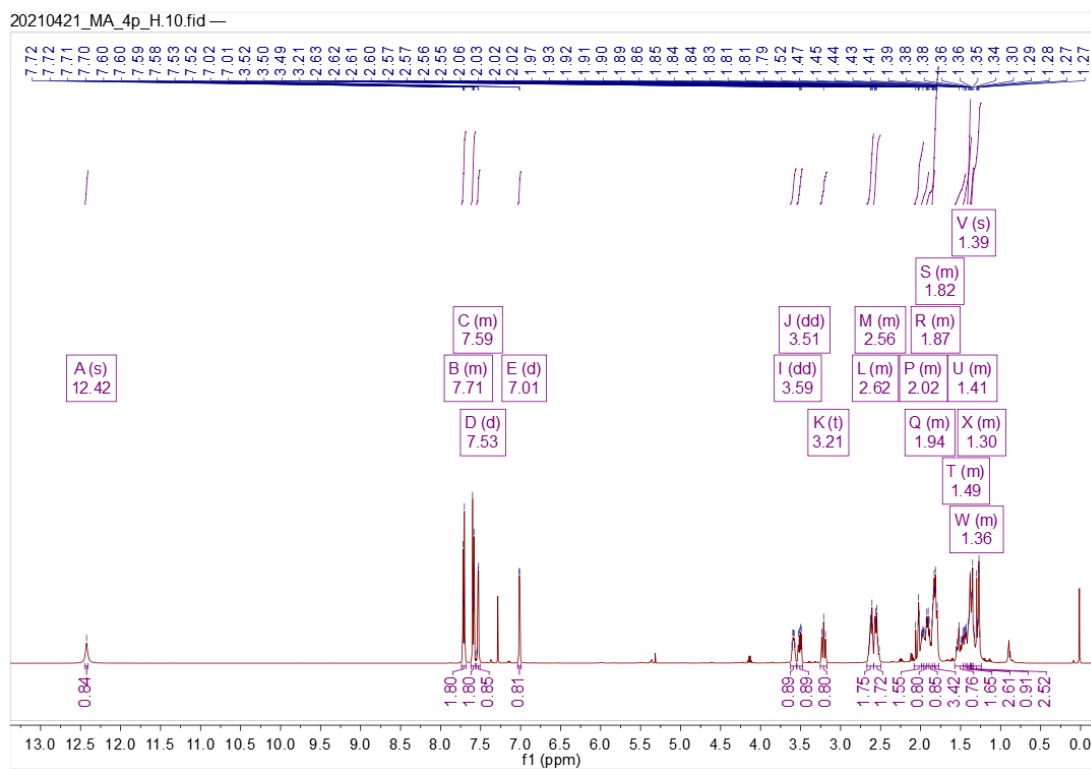

**Figure S52.** <sup>1</sup>H NMR spectrum (Chloroform-*d*, 500 MHz) of **4n**.

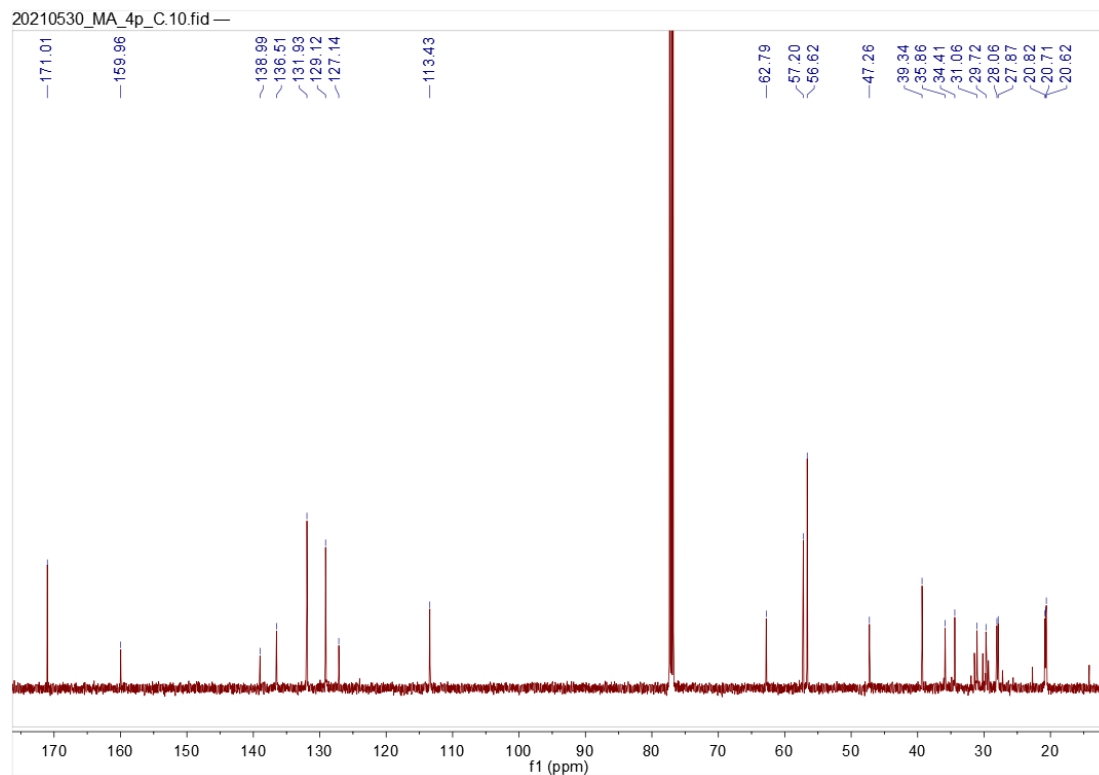

**Figure S53.**  $^{13}\text{C}$  NMR spectrum (Chloroform- $d$ , 126 MHz) of **4n**.

MA\_4p #3896 RT: 10.48 AV: 1 NL: 9.89E7  
T: FTMS + p ESI Full ms [200.0000-2000.0000]

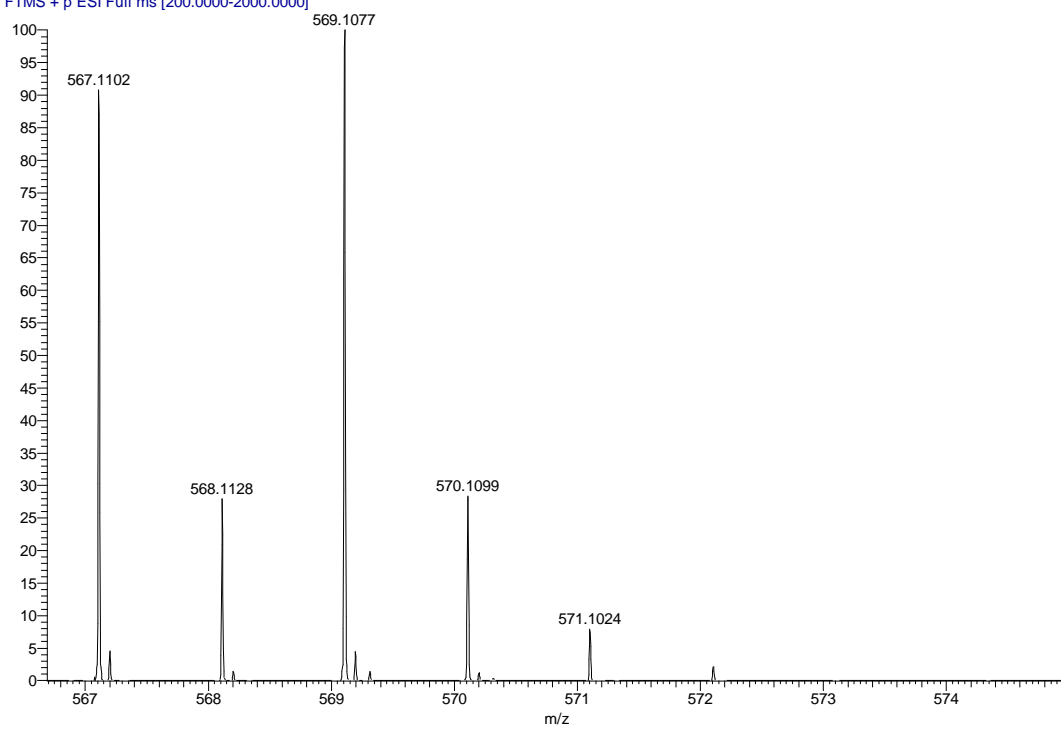

**Figure S54.** HRMS spectrum of **4n**.

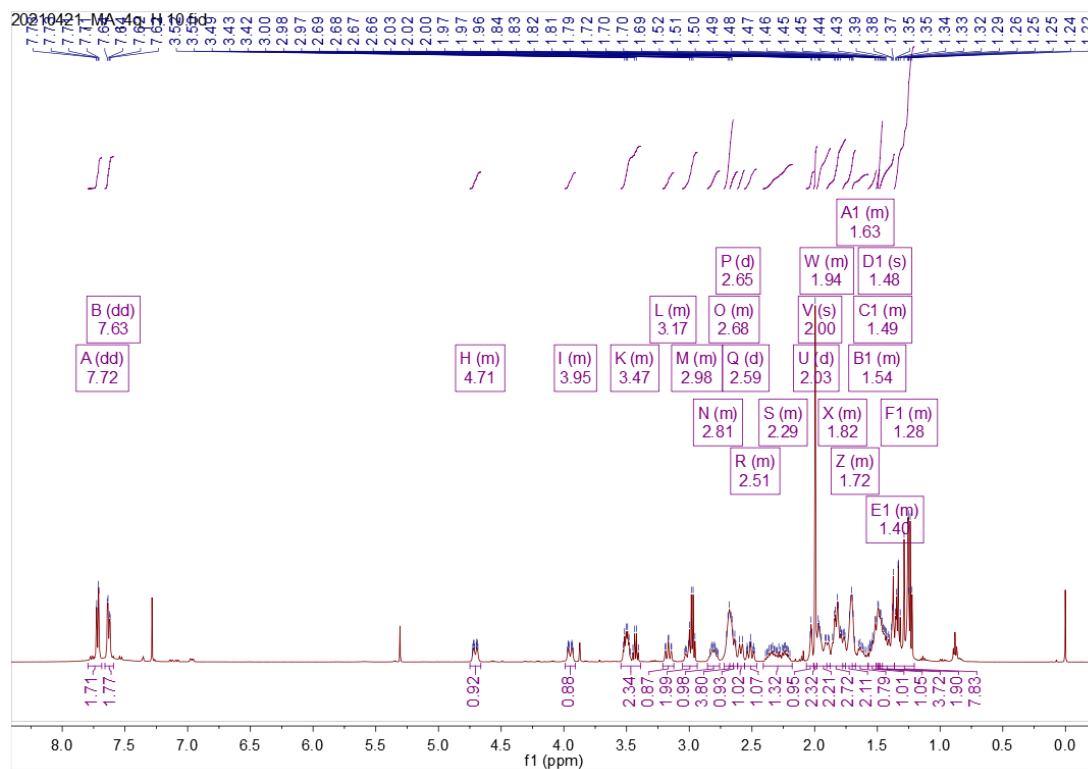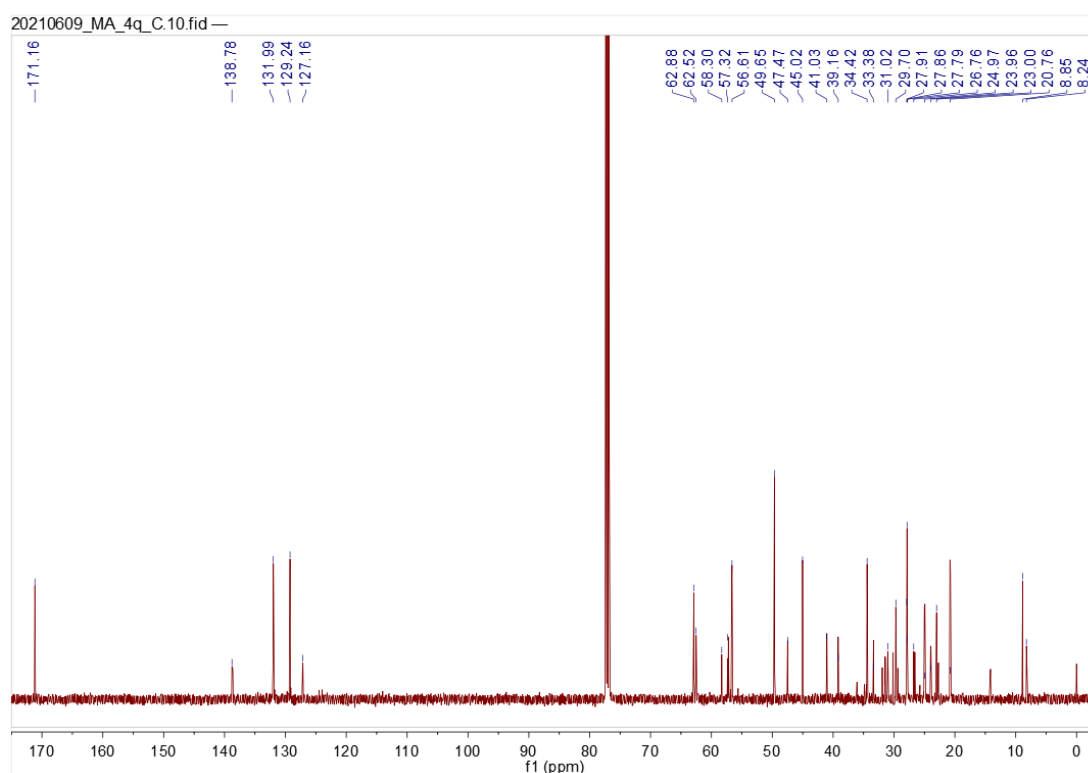

**Figure S56.  $^{13}\text{C}$  NMR spectrum (Chloroform- $d$ , 126 MHz) of **4o**.**

MA\_4q #3076 RT: 8.76 AV: 1 NL: 2.56E6  
T: FTMS + p ESI Full ms [200.0000-2000.0000]

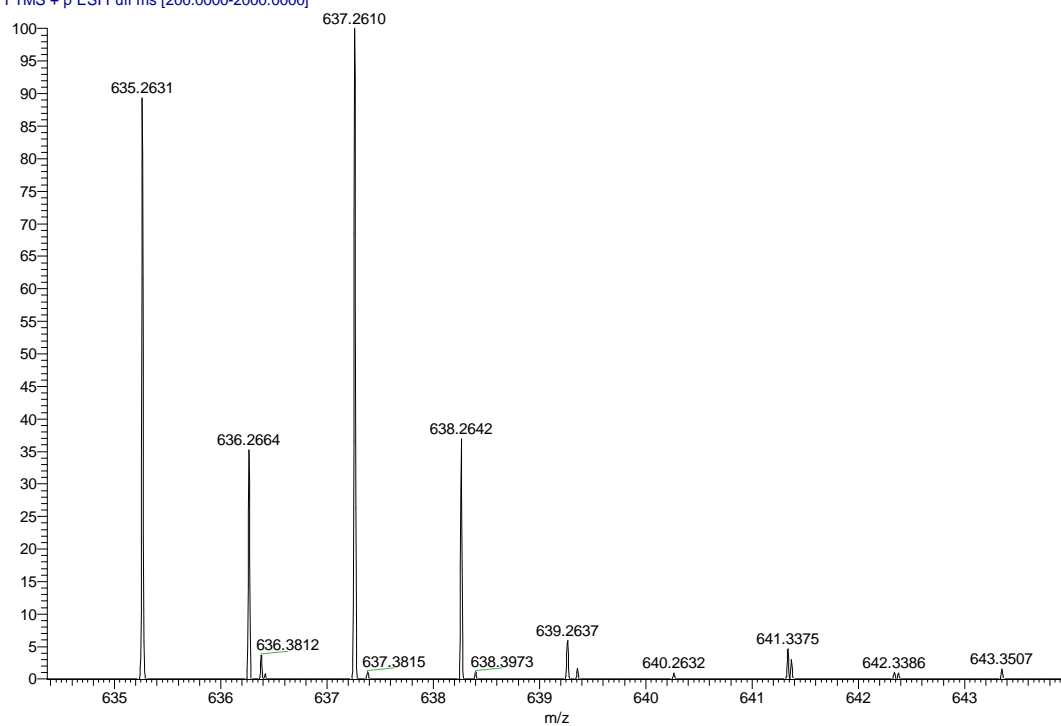

**Figure S57.** HRMS spectrum of **4o**.

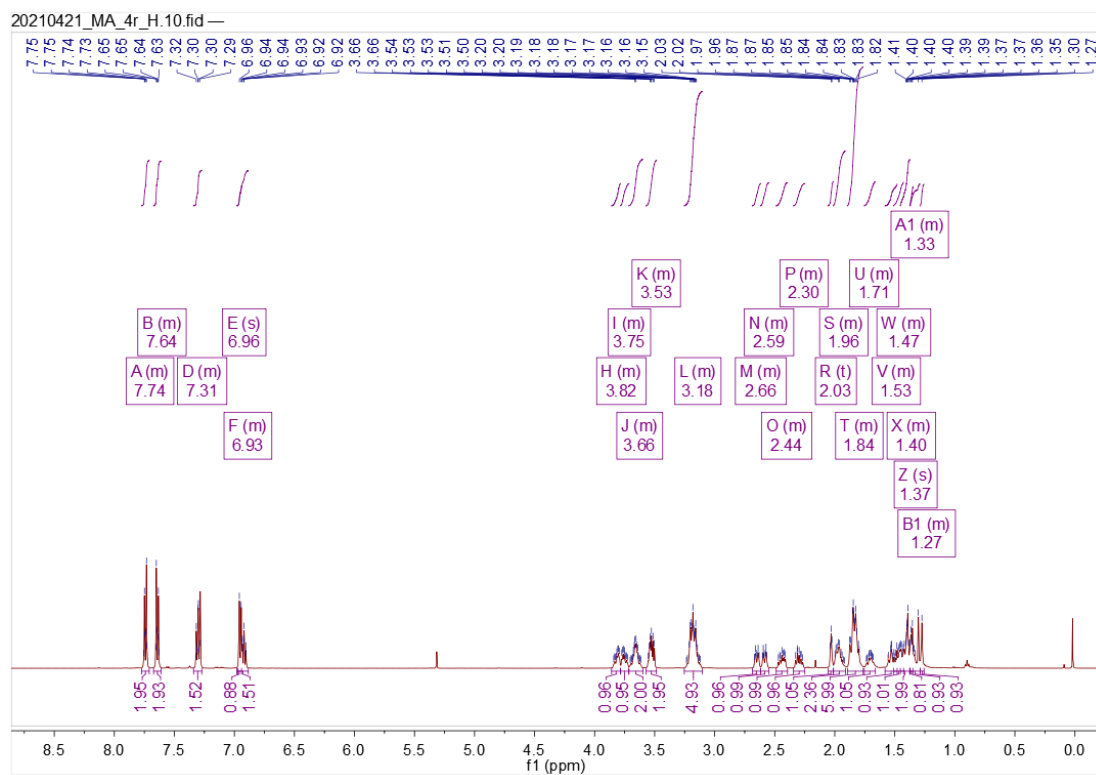

**Figure S58.** <sup>1</sup>H NMR spectrum (Chloroform-*d*, 500 MHz) of **4p**.

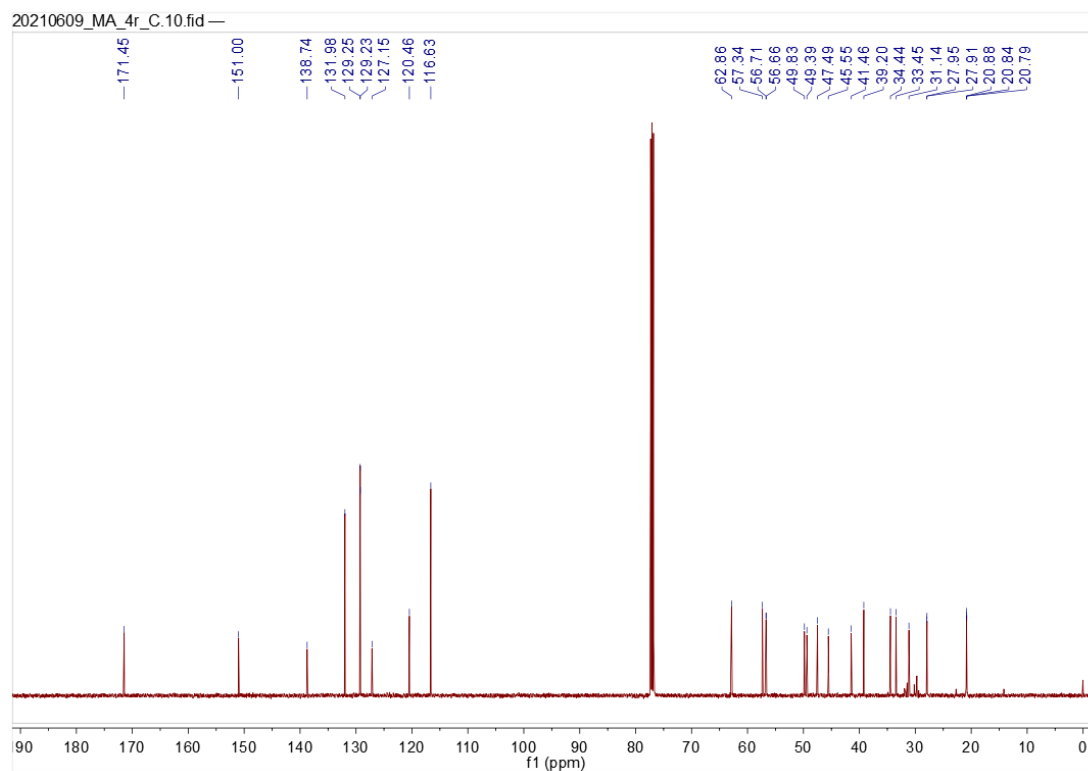

**Figure S59.**  $^{13}\text{C}$  NMR spectrum (Chloroform- $d$ , 126 MHz) of **4p**.

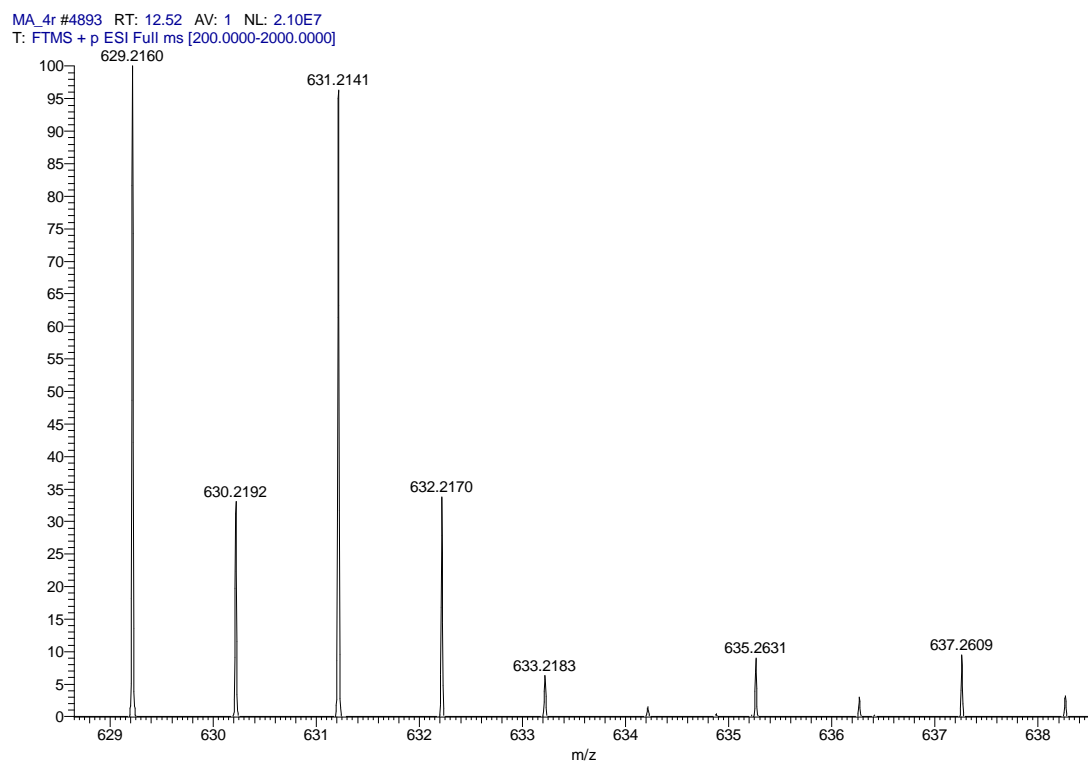

**Figure S60.** HRMS spectrum of **4p**.

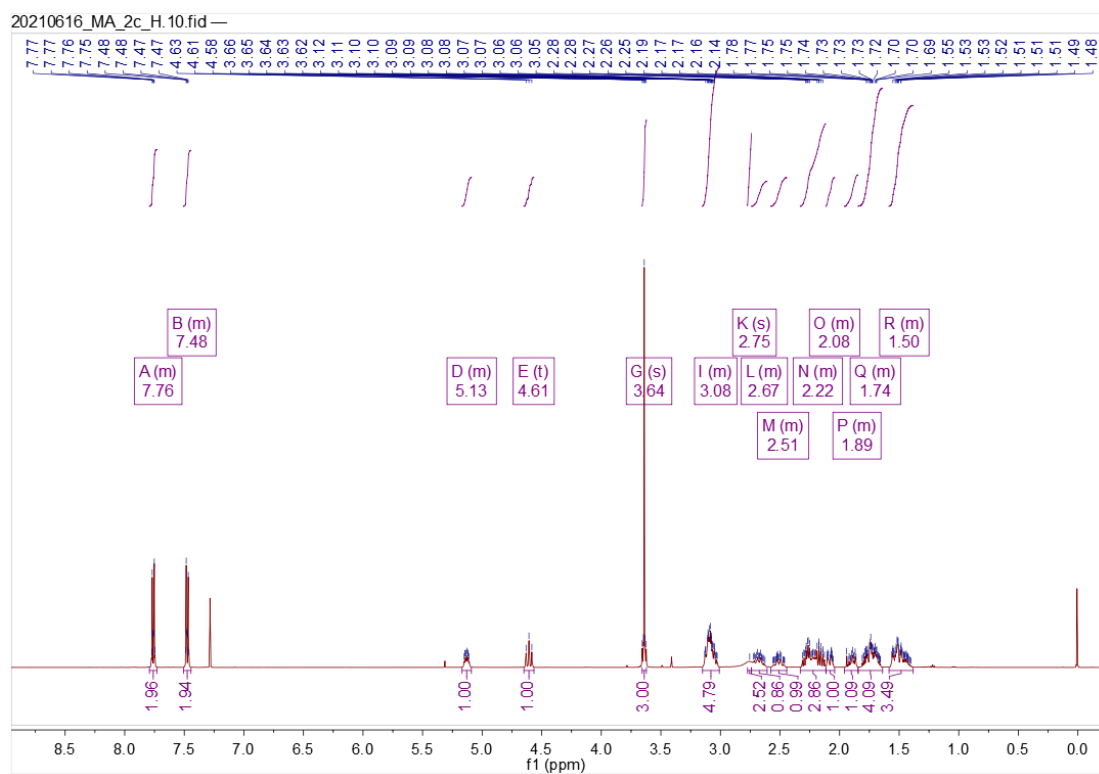

**Figure S61.**  $^1\text{H}$  NMR spectrum (Chloroform- $d$ , 500 MHz) of **2c**.

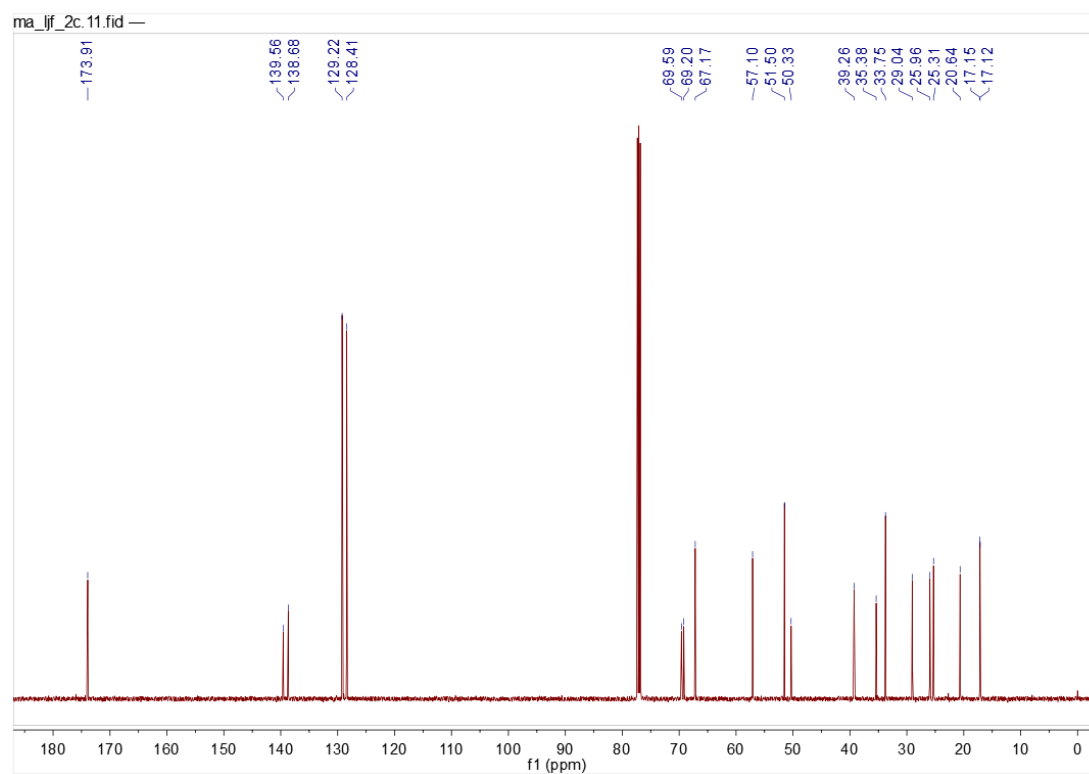

**Figure S62.**  $^{13}\text{C}$  NMR spectrum (Chloroform- $d$ , 126 MHz) of **2c**.

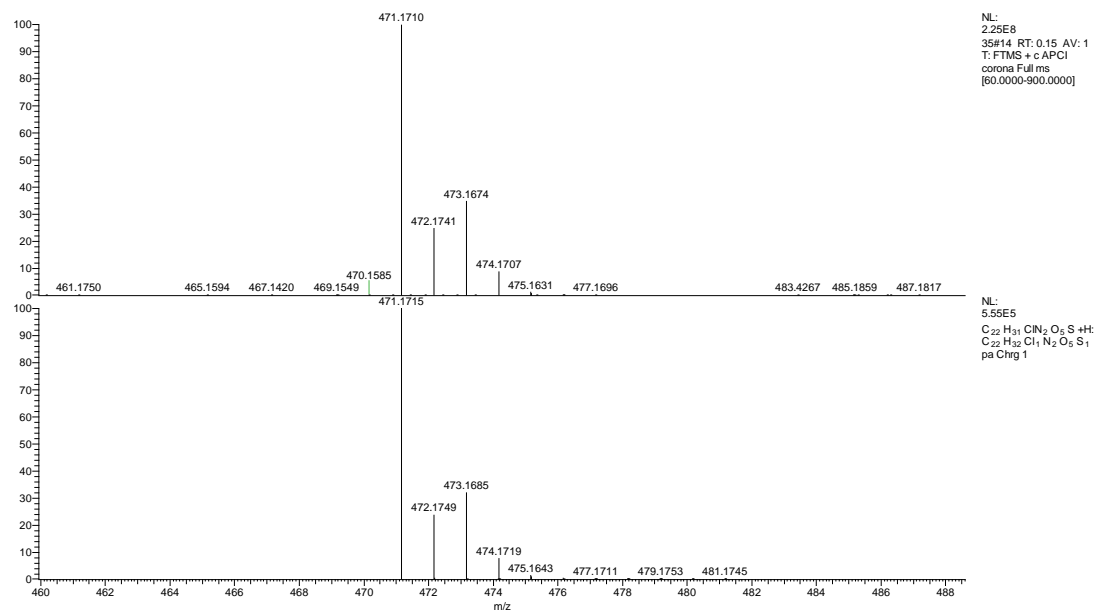

**Figure S63.** HRMS spectrum of **2c**.

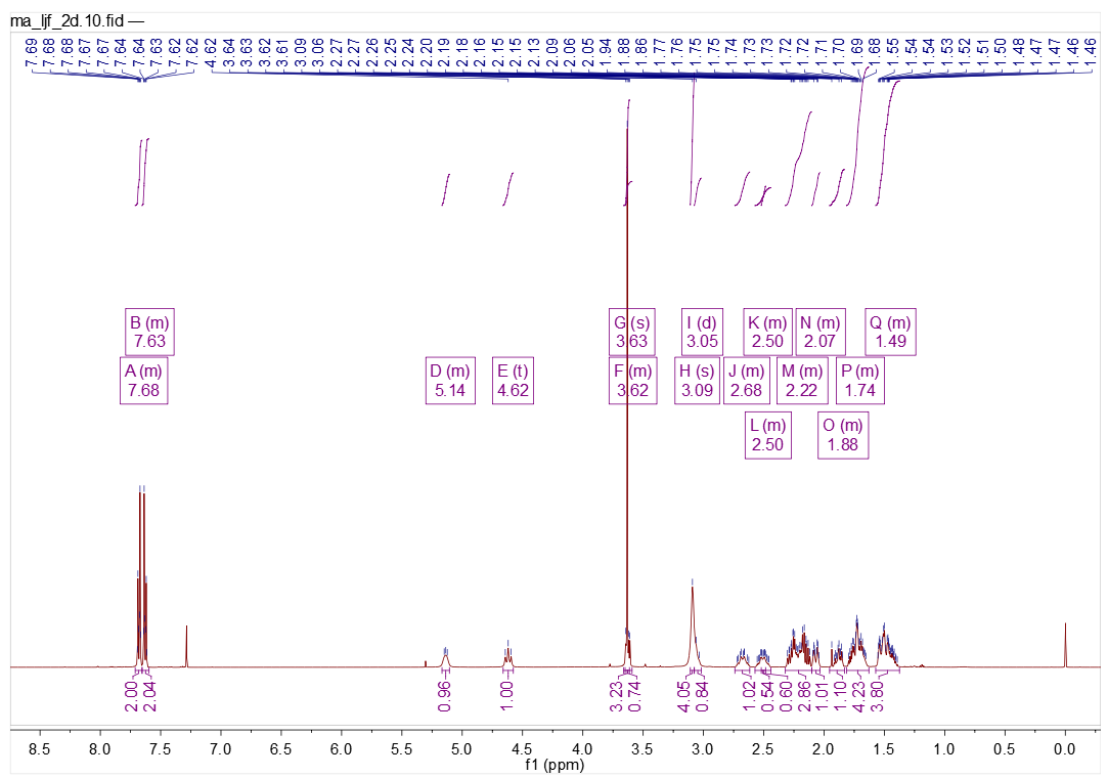

**Figure S64.** <sup>1</sup>H NMR spectrum (Chloroform-*d*, 500 MHz) of **2d**.

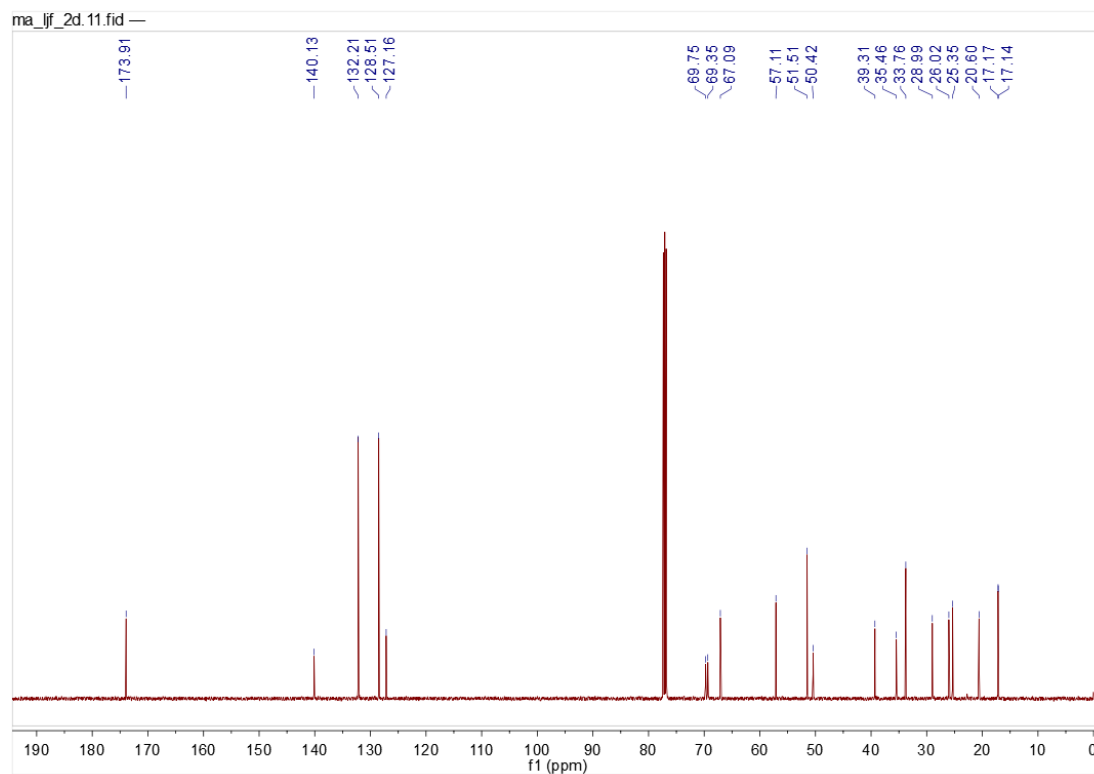

**Figure S65.**  $^{13}\text{C}$  NMR spectrum (Chloroform- $d$ , 126 MHz) of **2d**.

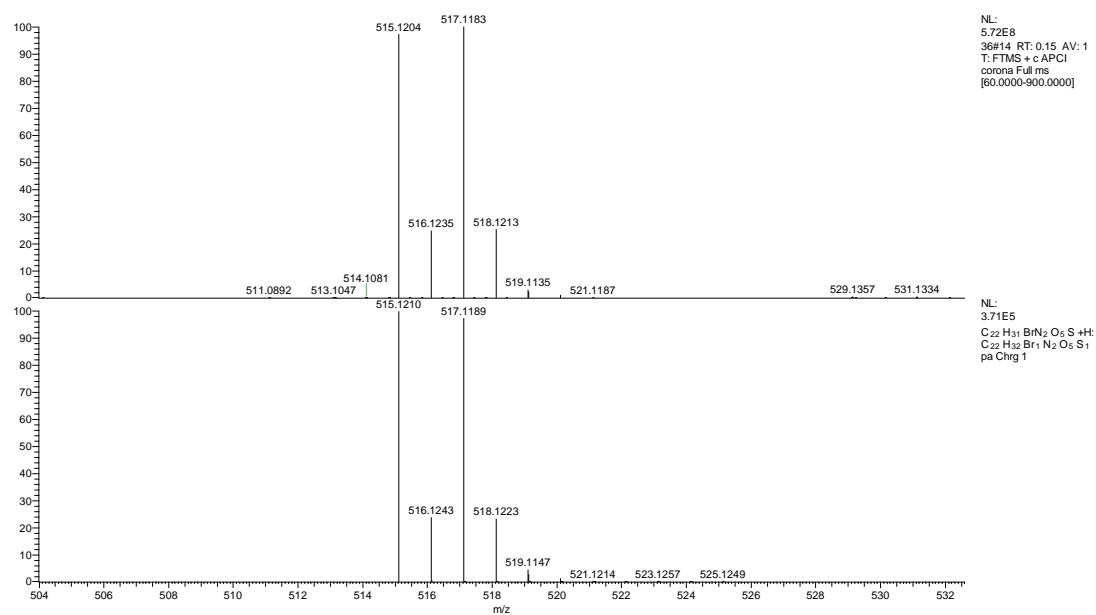

**Figure S66.** HRMS spectrum of **2d**.



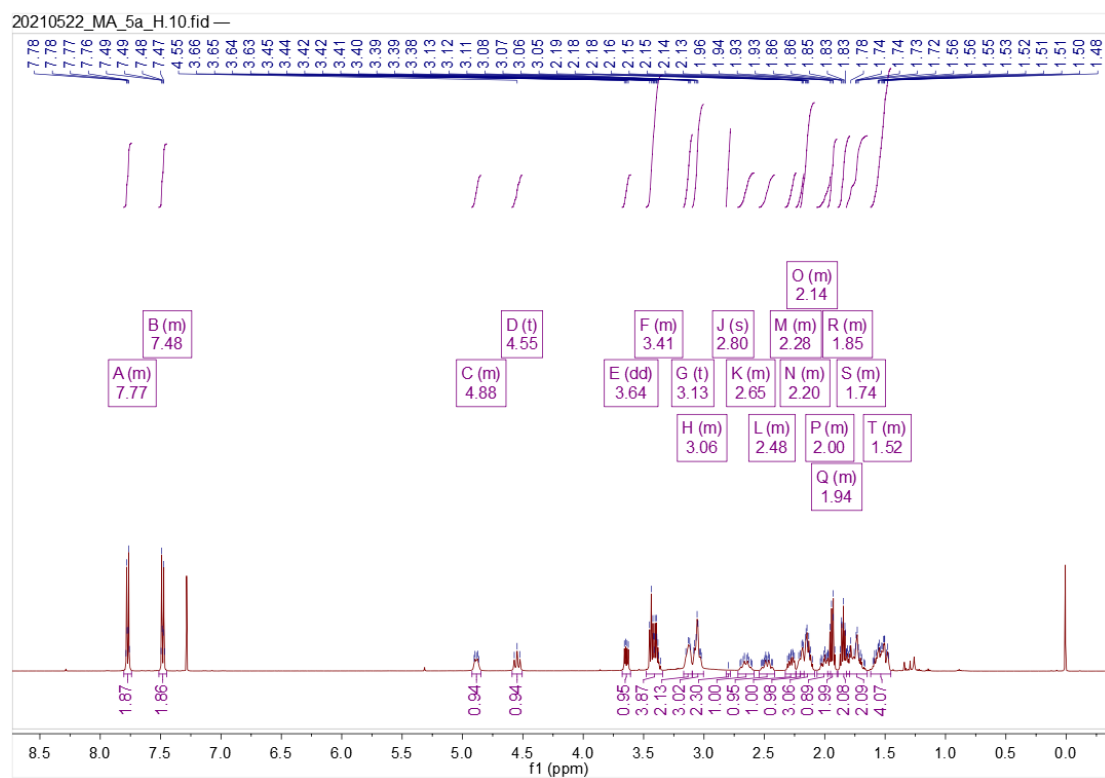

**Figure S67.**  $^1\text{H}$  NMR spectrum (Chloroform- $d$ , 500 MHz) of **3c**.

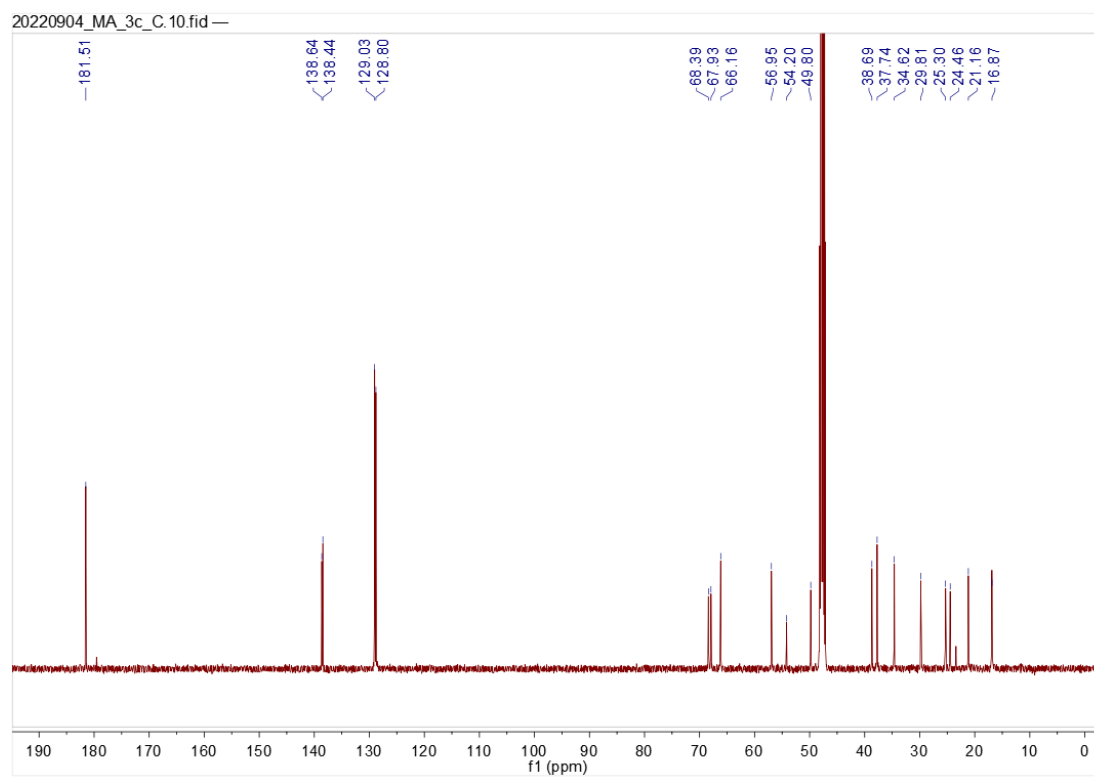

**Figure S68.**  $^{13}\text{C}$  NMR spectrum (Methanol- $d_4$ , 126 MHz) of **3c**.

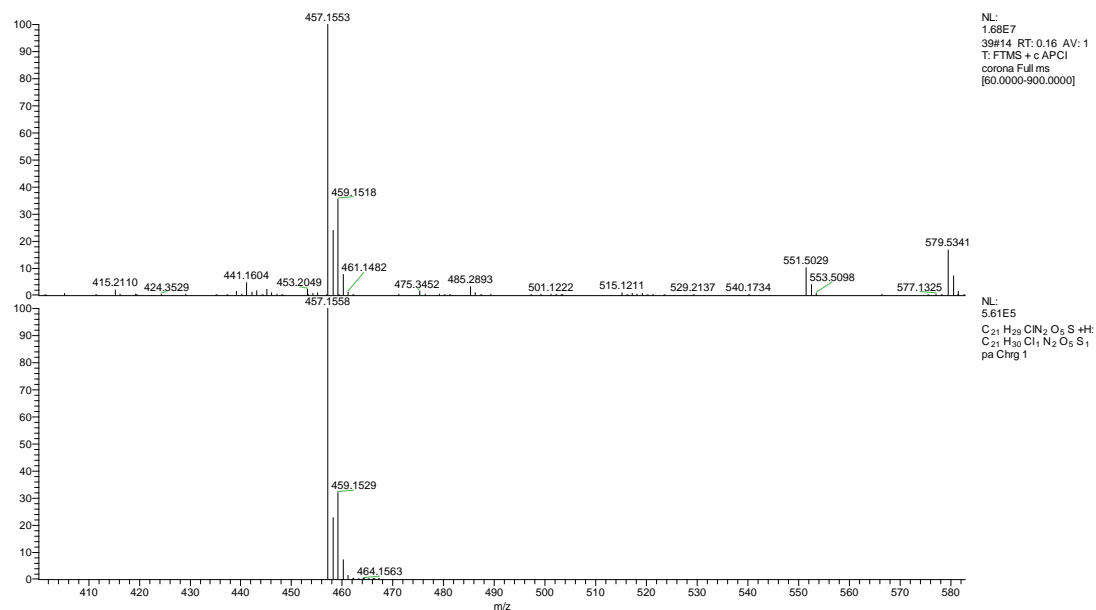

**Figure S69.** HRMS spectrum of **3c**.

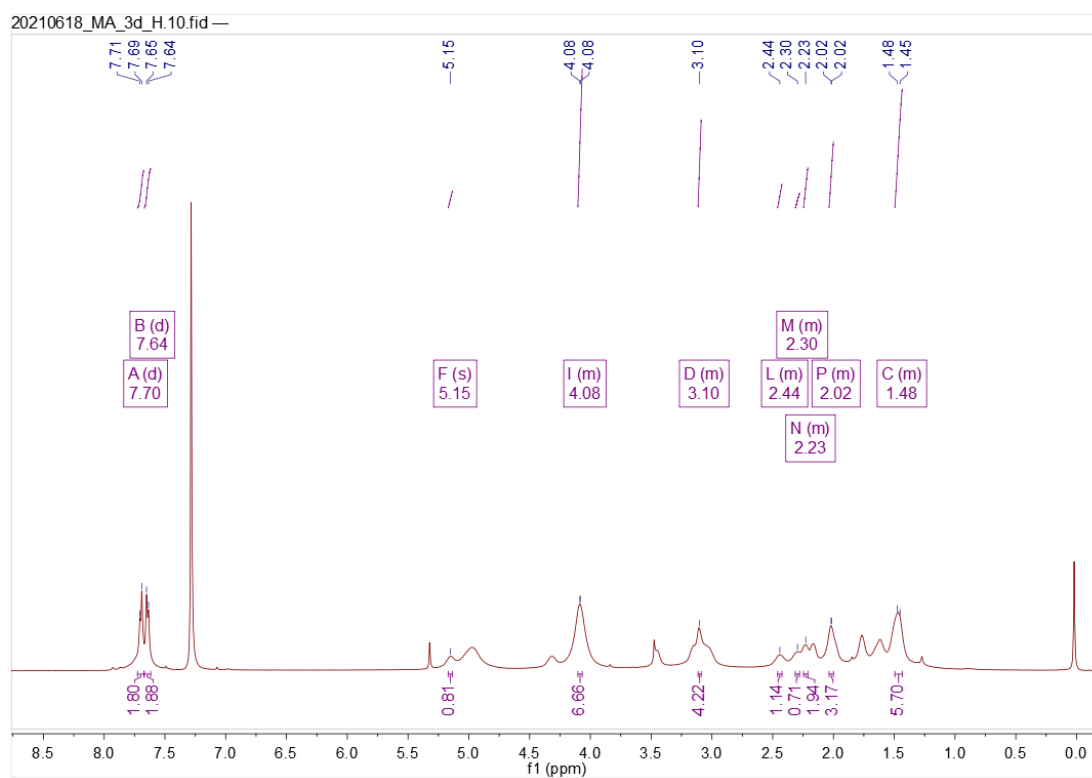

**Figure S70.** <sup>1</sup>H NMR spectrum (Chloroform-*d*, 500 MHz) of **3d**.

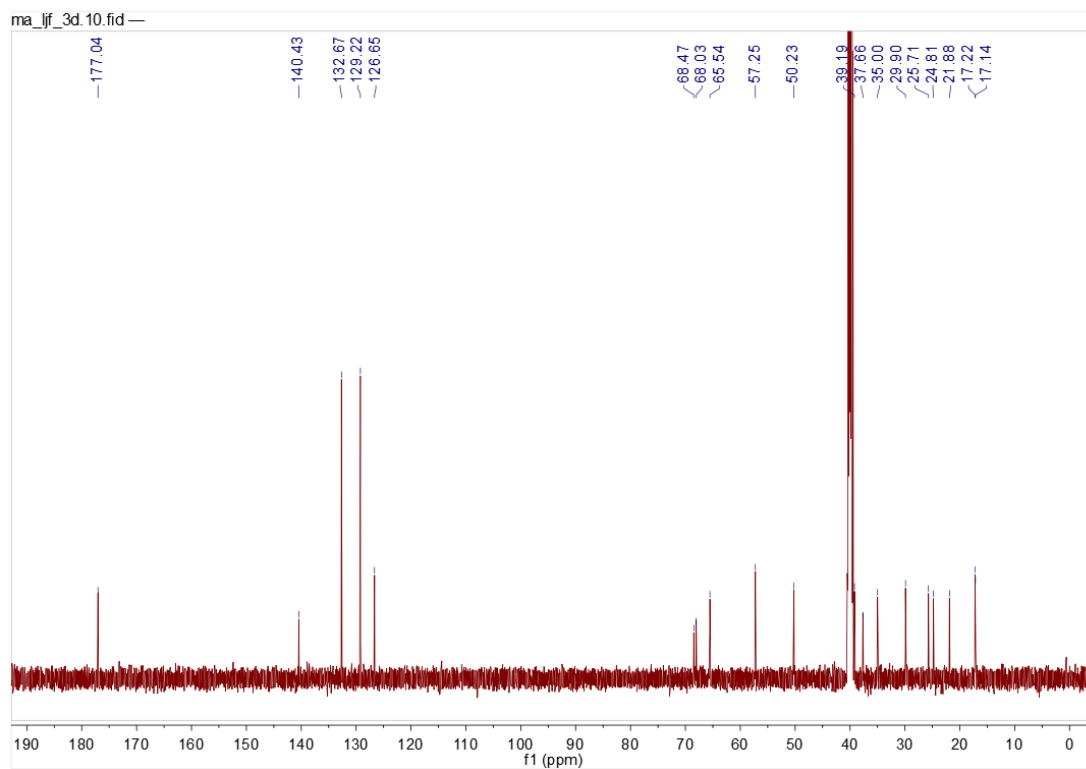

**Figure S71.**  $^{13}\text{C}$  NMR spectrum (Dimethyl sulfoxide- $d_6$ , 126 MHz) of **3d**.

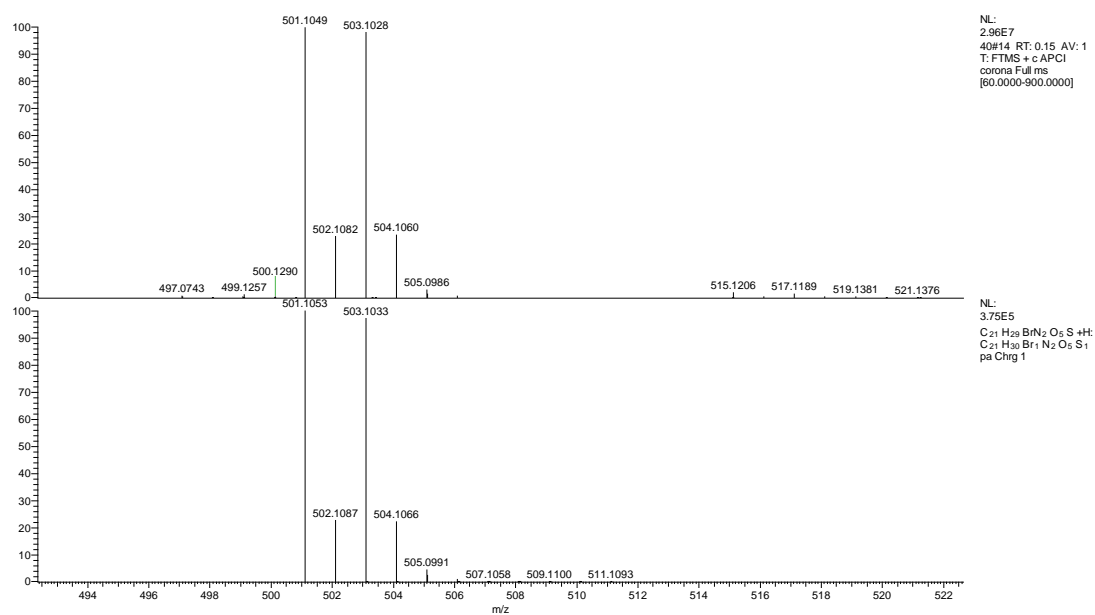

**Figure S72.** HRMS spectrum of **3d**.

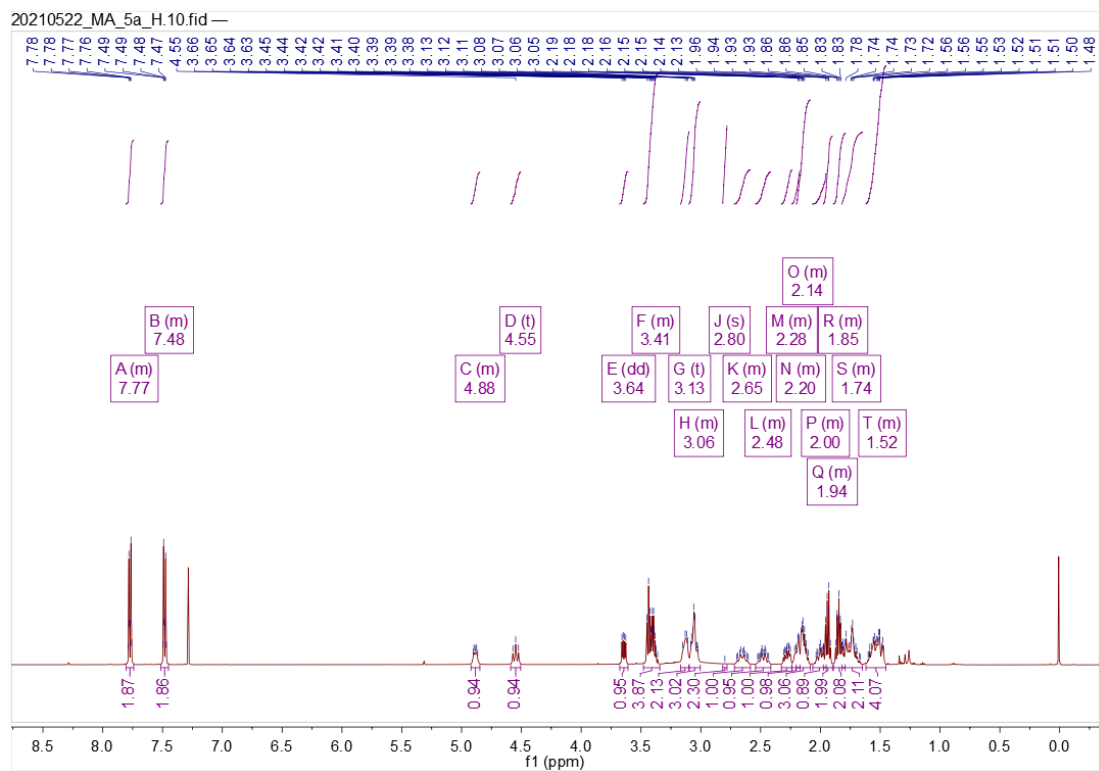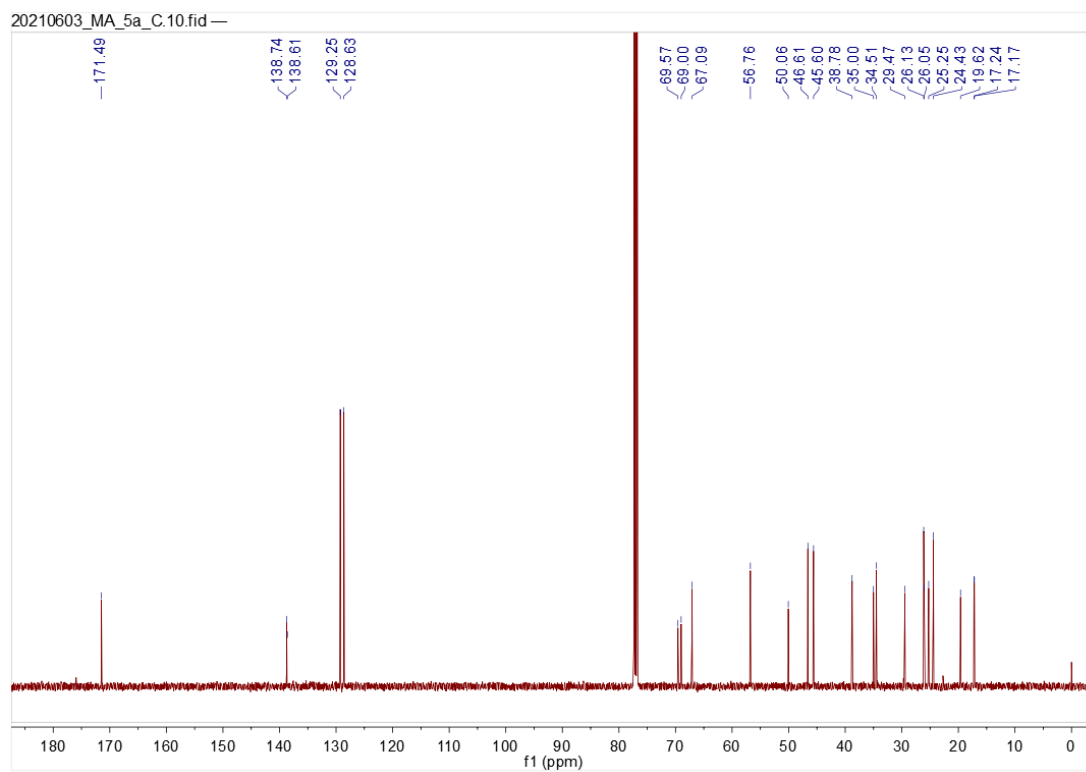

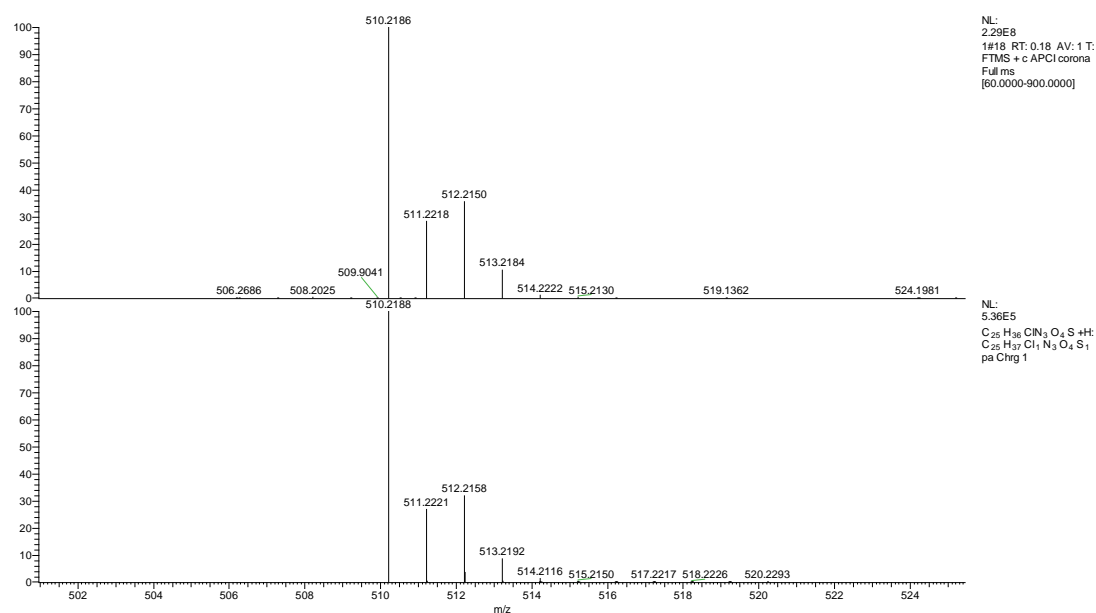

**Figure S75.** HRMS spectrum of **5a**.

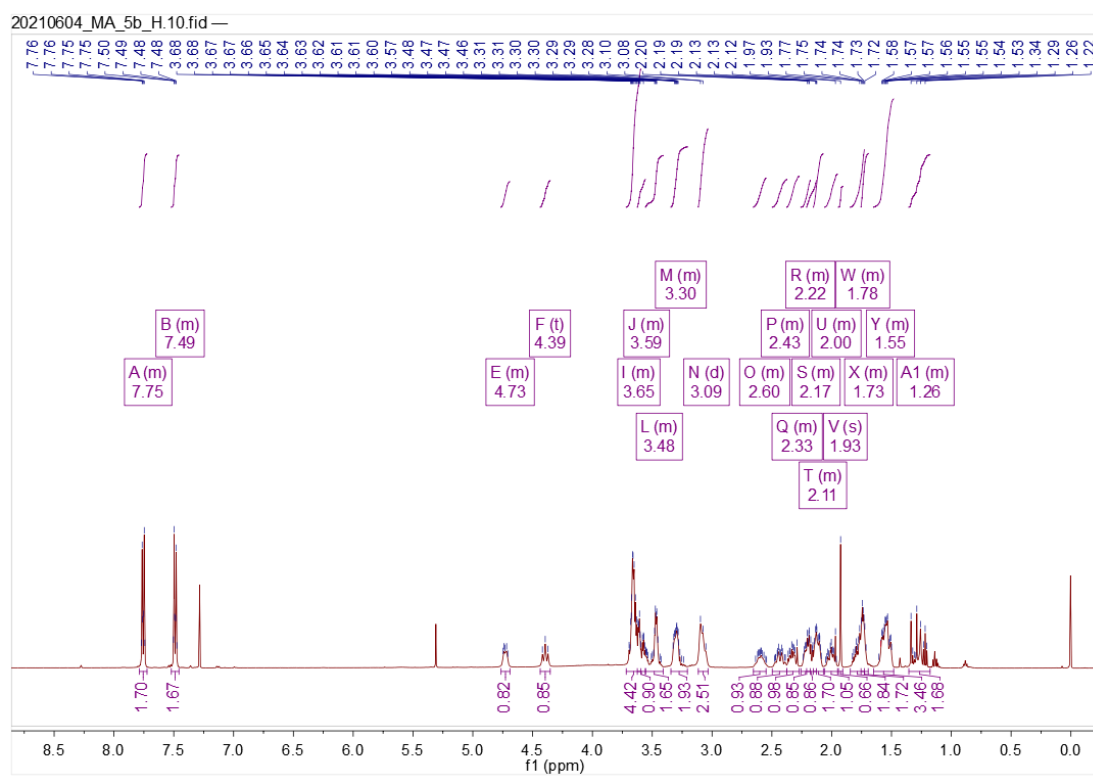

**Figure S76.**  $^1H$  NMR spectrum (Chloroform- $d$ , 500 MHz) of **5b**.

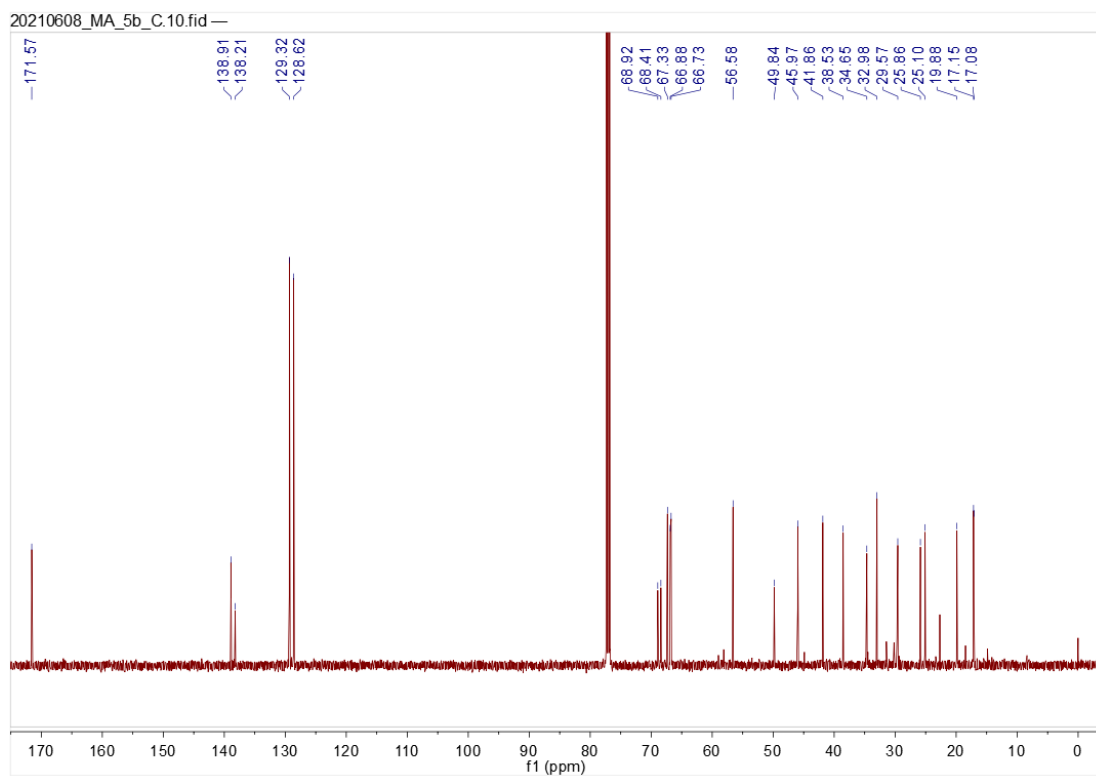

**Figure S77.**  $^{13}\text{C}$  NMR spectrum (Chloroform- $d$ , 126 MHz) of **5b**.

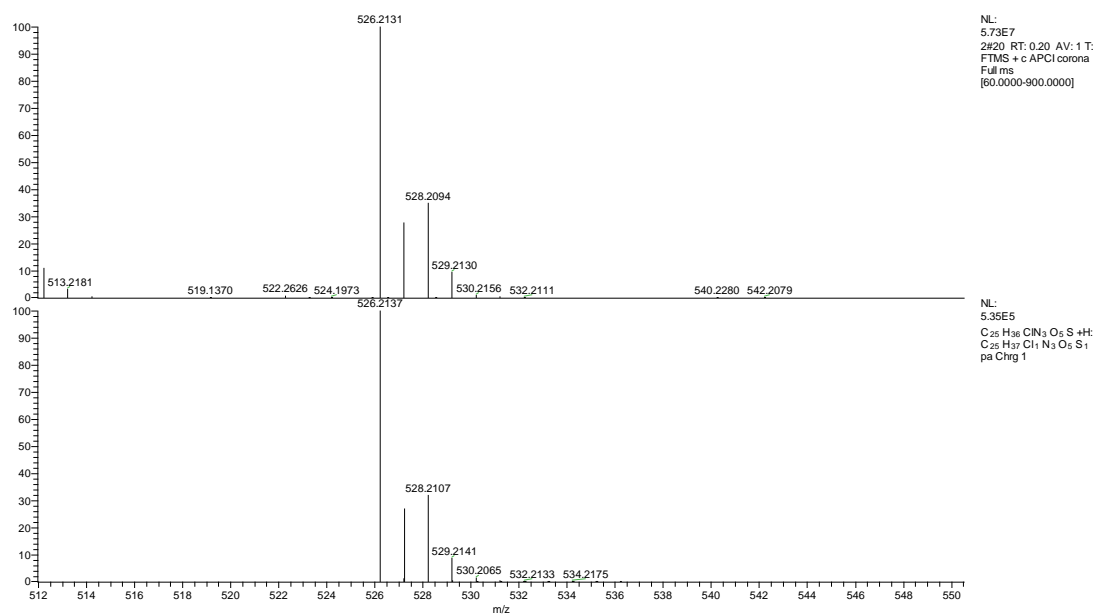

**Figure S78.** HRMS spectrum of **5b**.

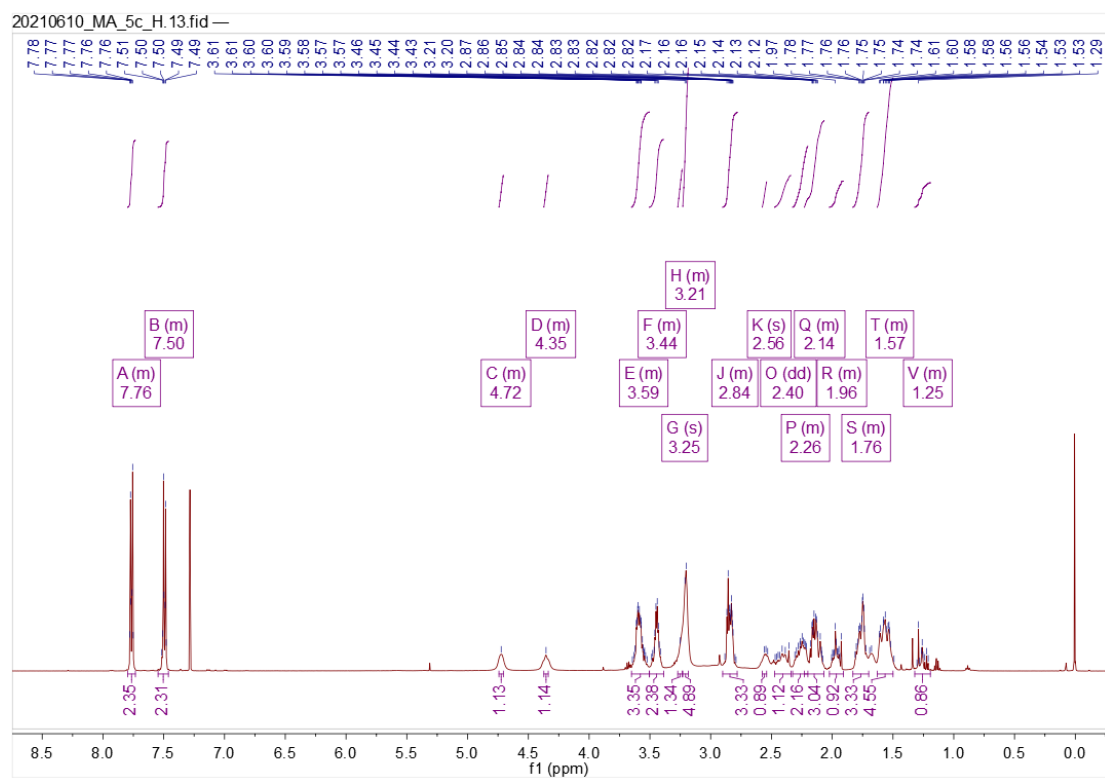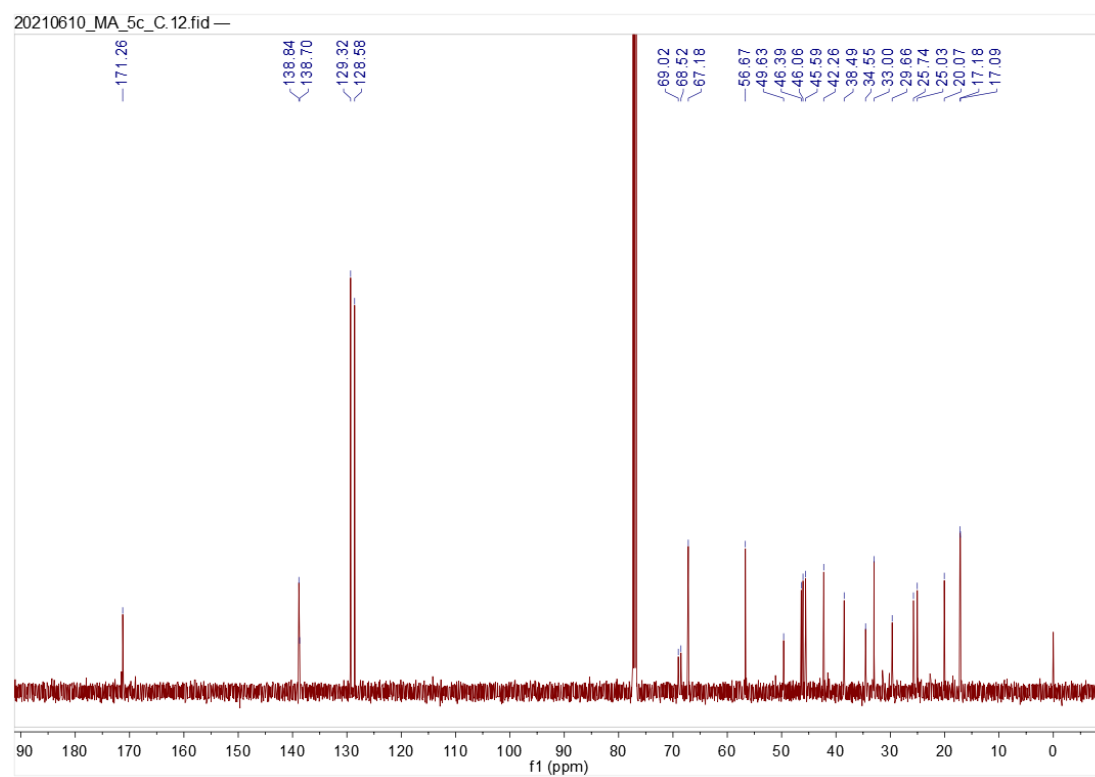

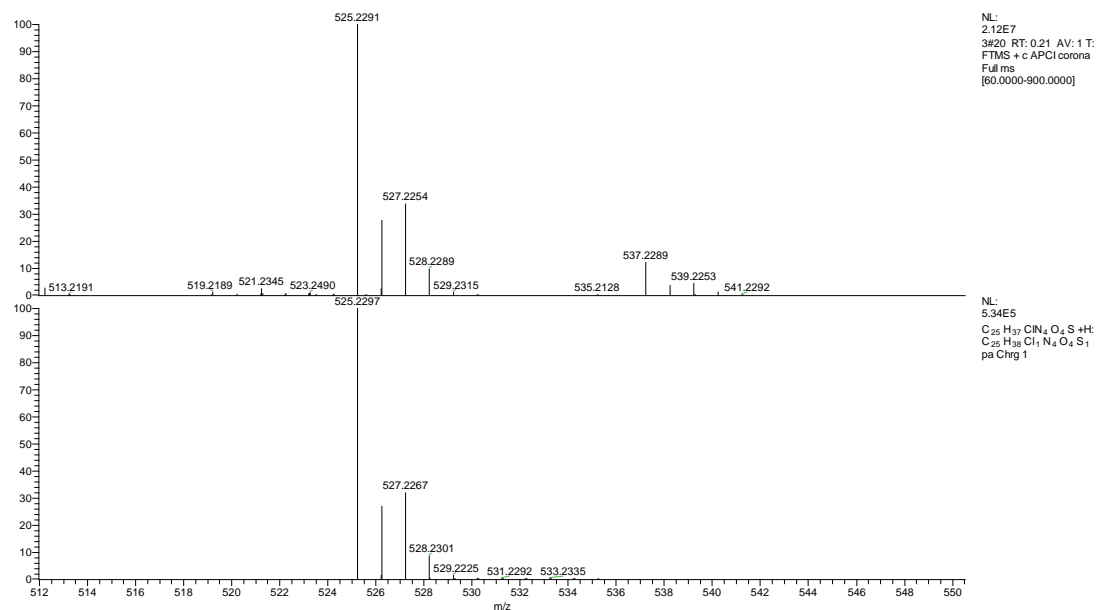

**Figure S81.** HRMS spectrum of **5c**.

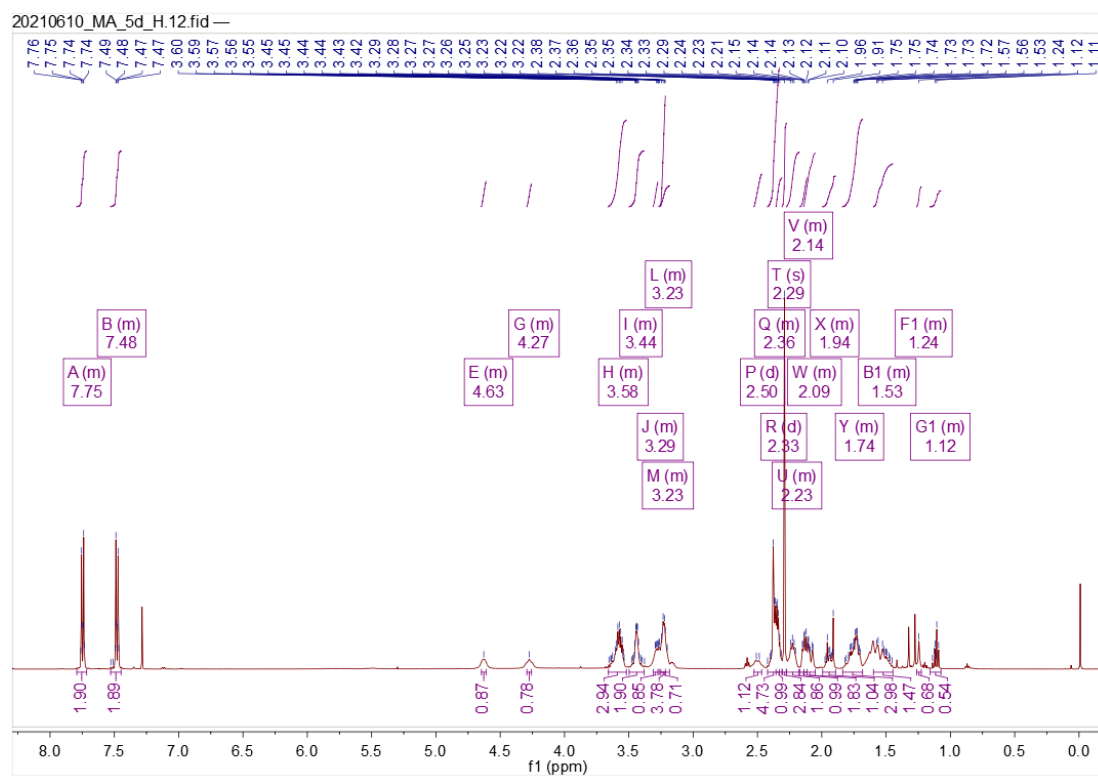

**Figure S82.** <sup>1</sup>H NMR spectrum (Chloroform-*d*, 500 MHz) of **5d**.



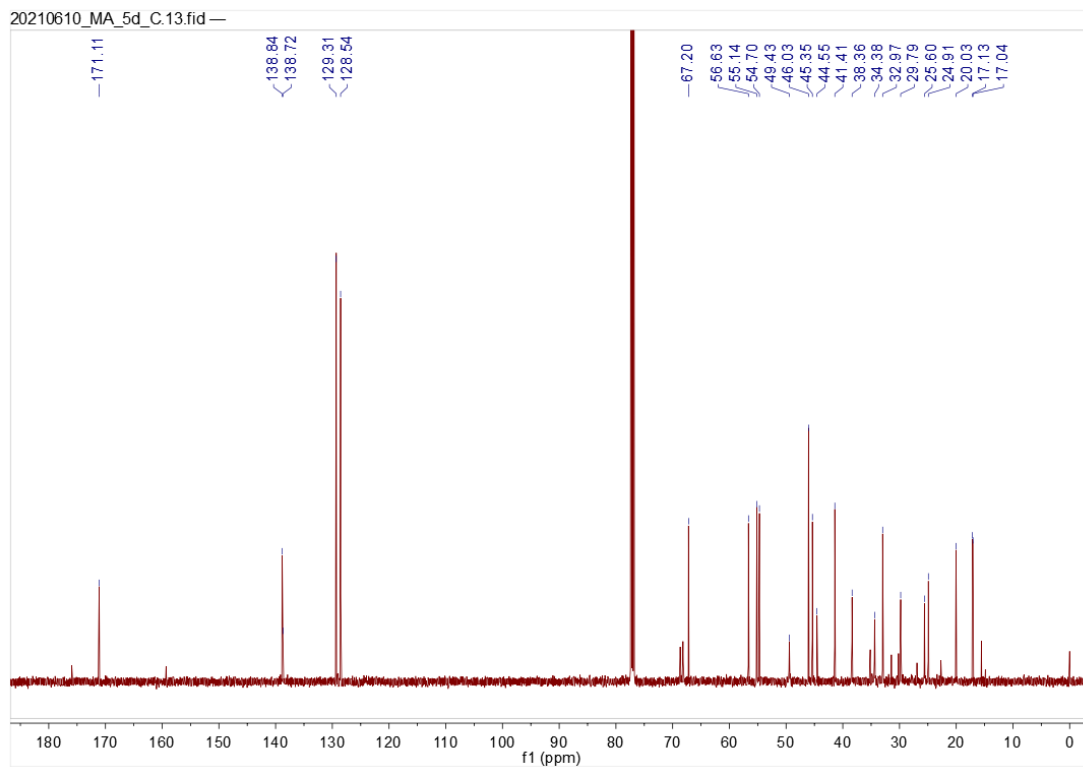

**Figure S83.**  $^{13}\text{C}$  NMR spectrum (Chloroform-*d*, 126 MHz) of **5d**.

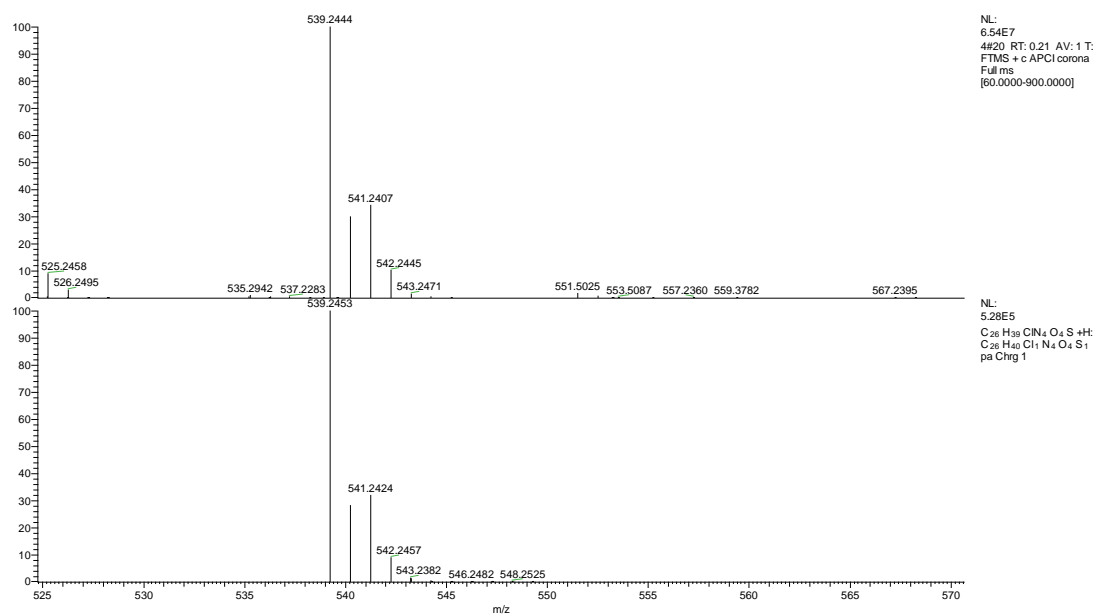

**Figure S84.** HRMS spectrum of **5d**.

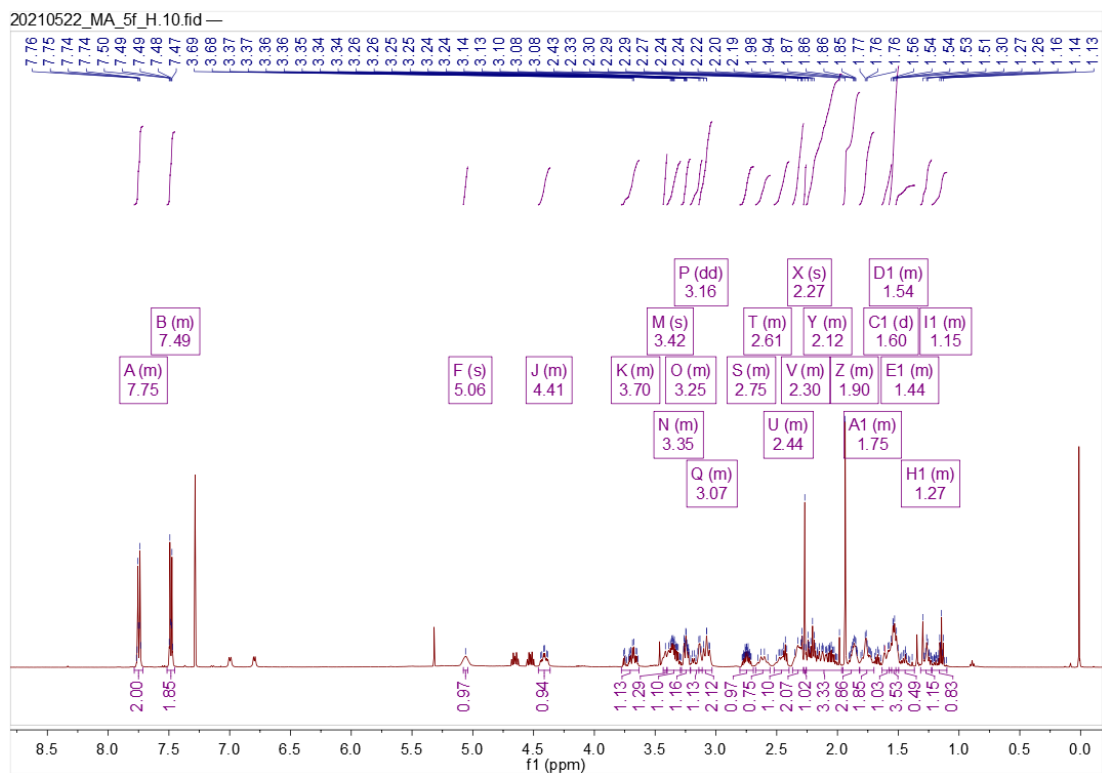

**Figure S85.**  $^1\text{H}$  NMR spectrum (Chloroform- $d$ , 500 MHz) of **5e**.

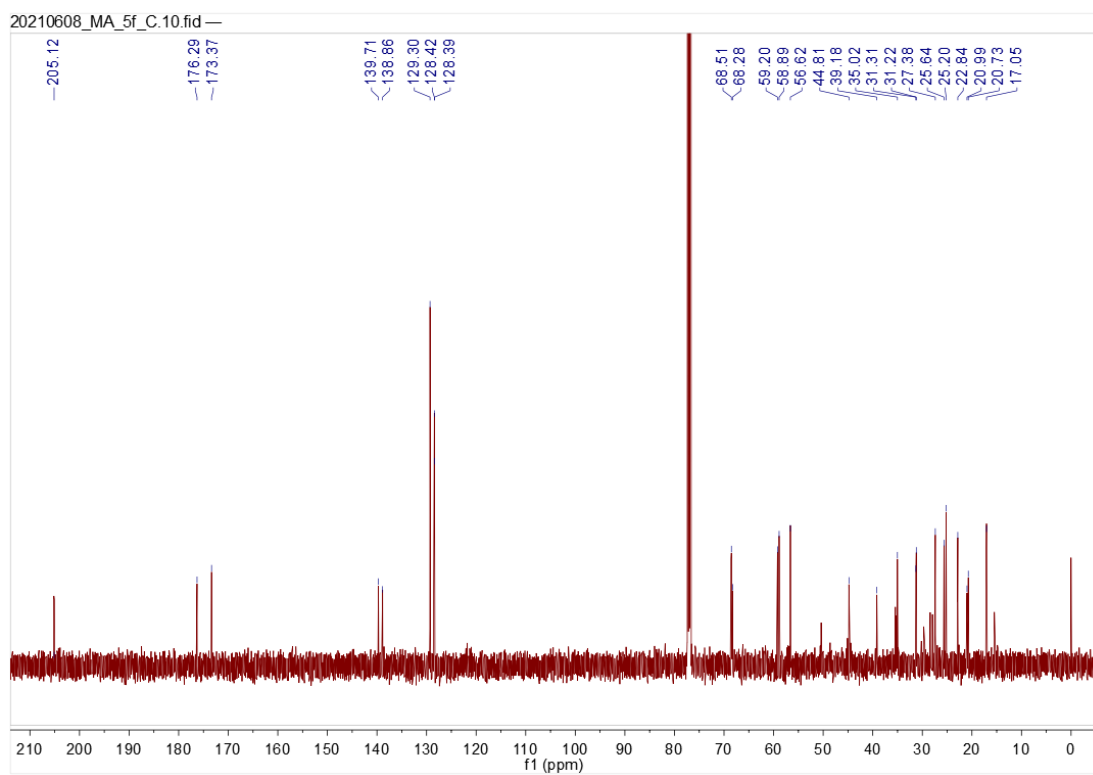

**Figure S86.**  $^{13}\text{C}$  NMR spectrum (Chloroform- $d$ , 126 MHz) of **5e**.

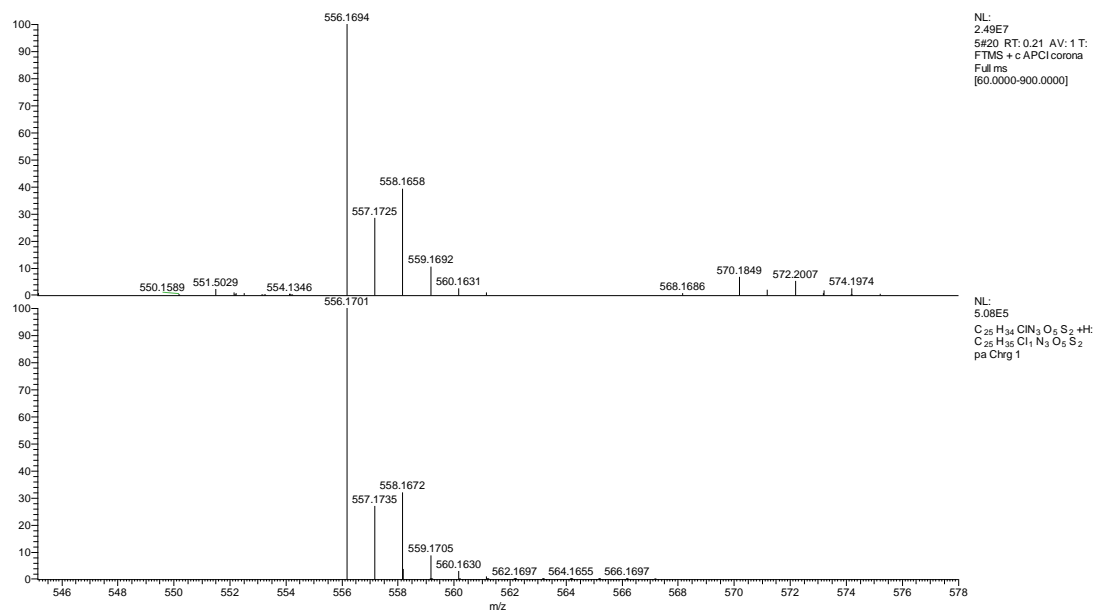

**Figure S87.** HRMS spectrum of **5e**.

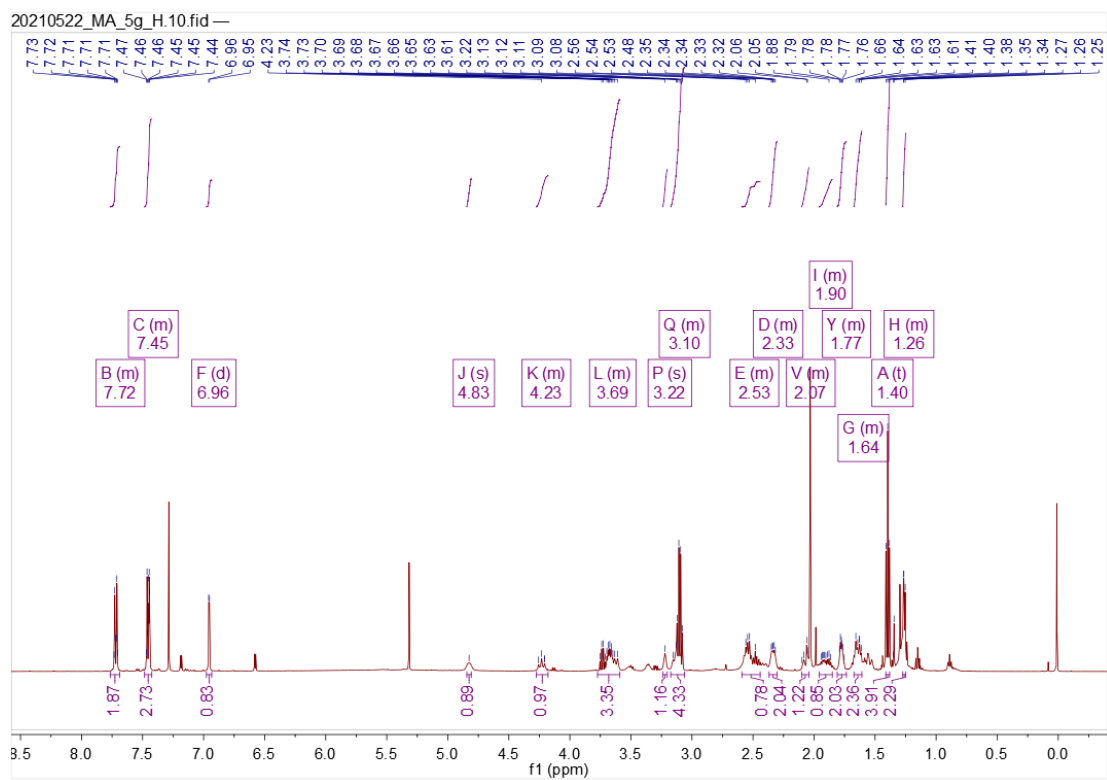

**Figure S88.** <sup>1</sup>H NMR spectrum (Chloroform-*d*, 500 MHz) of **5f**.

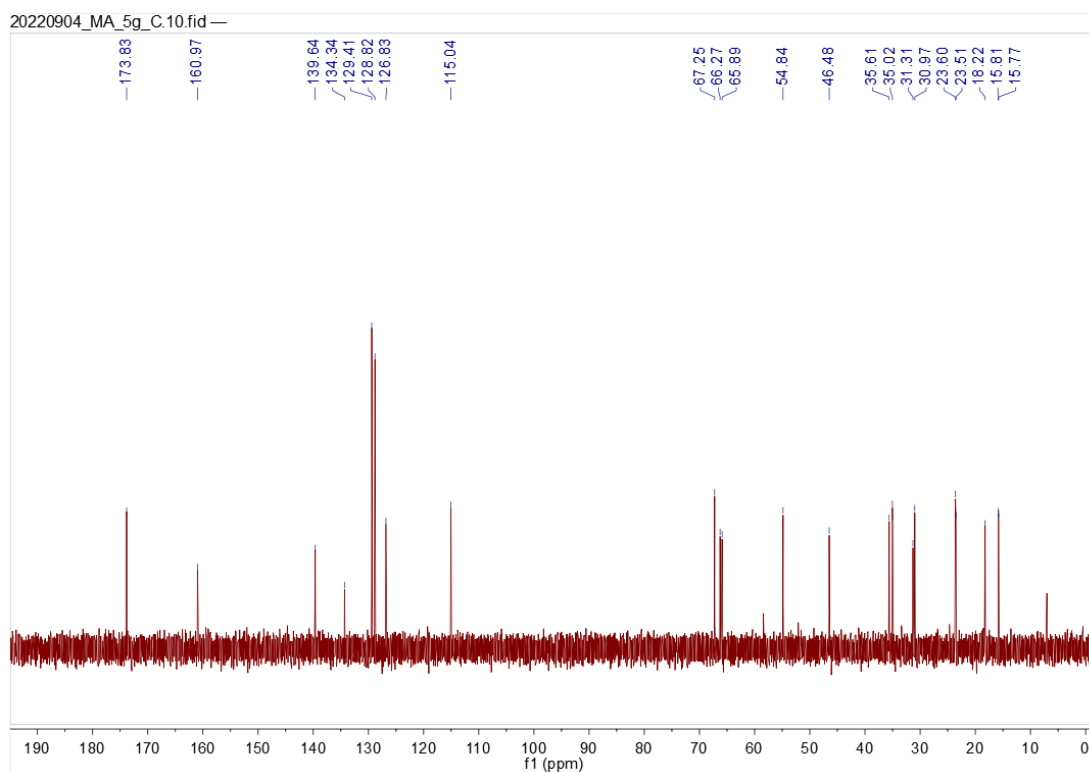

**Figure S89.**  $^{13}\text{C}$  NMR spectrum (Deuterium Oxide, 126 MHz) of **5f**.

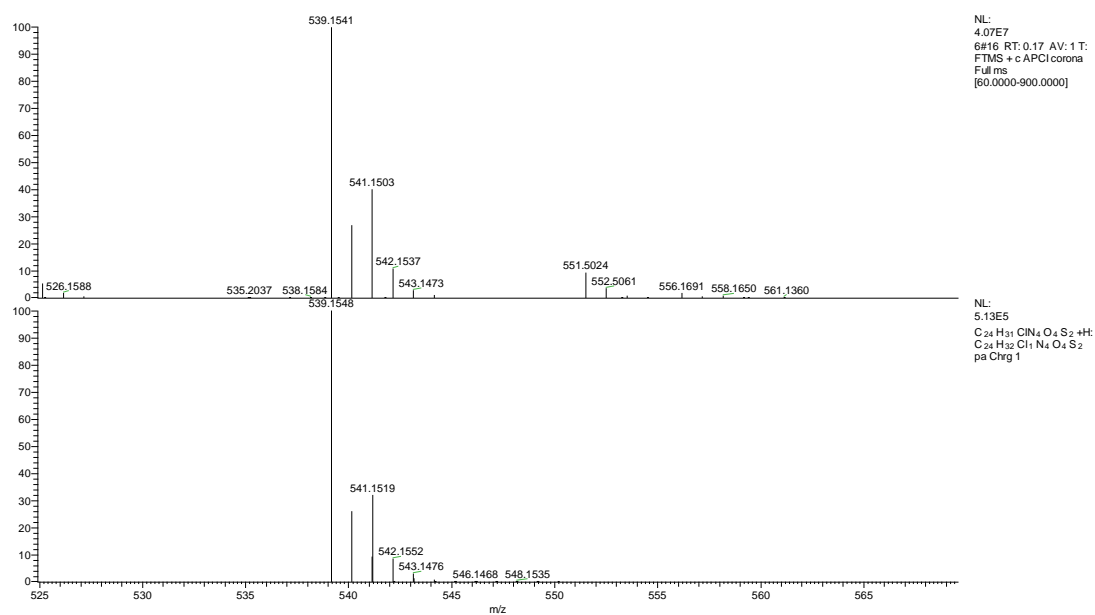

**Figure S90.** HRMS spectrum of **5f**.

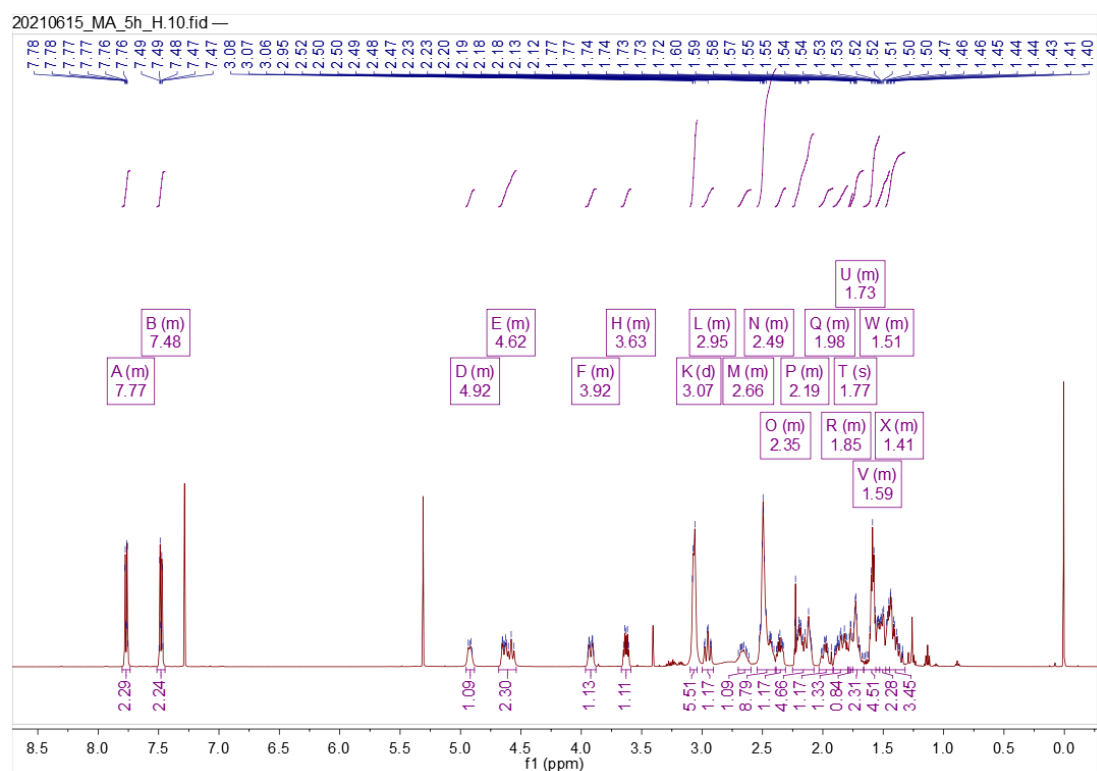

**Figure S91.**  $^1\text{H}$  NMR spectrum (Chloroform- $d$ , 500 MHz) of **5g**.

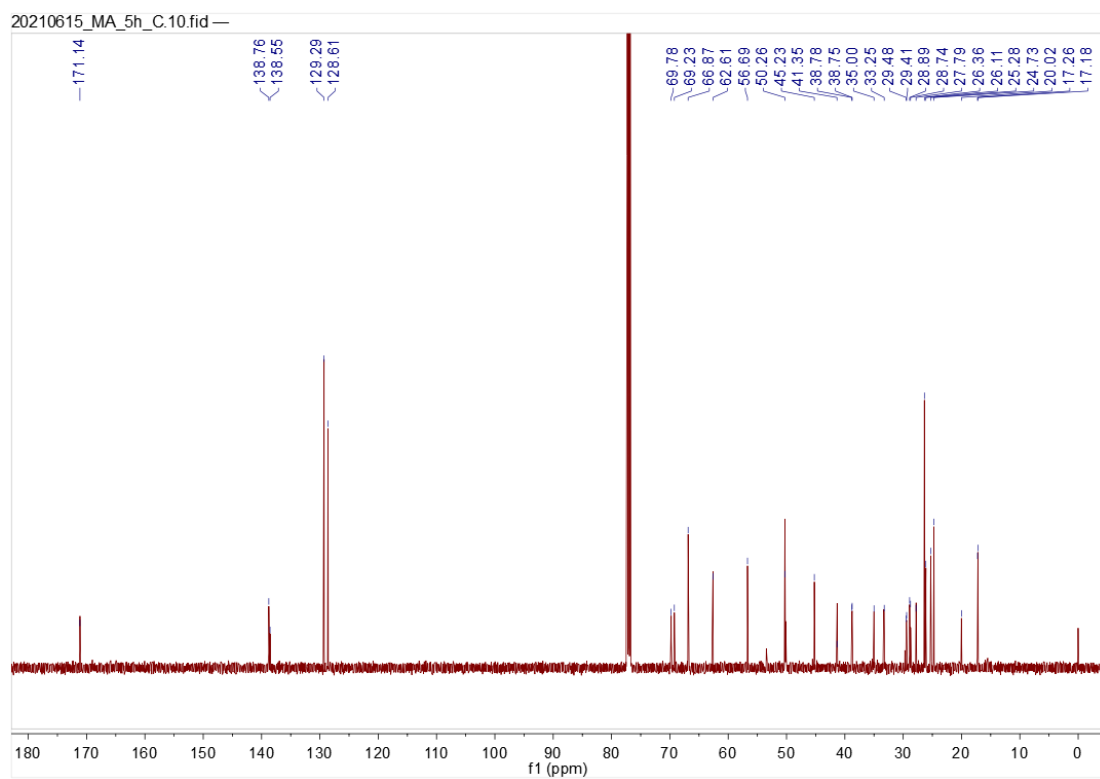

**Figure S92.**  $^{13}\text{C}$  NMR spectrum (Chloroform- $d$ , 126 MHz) of **5g**.

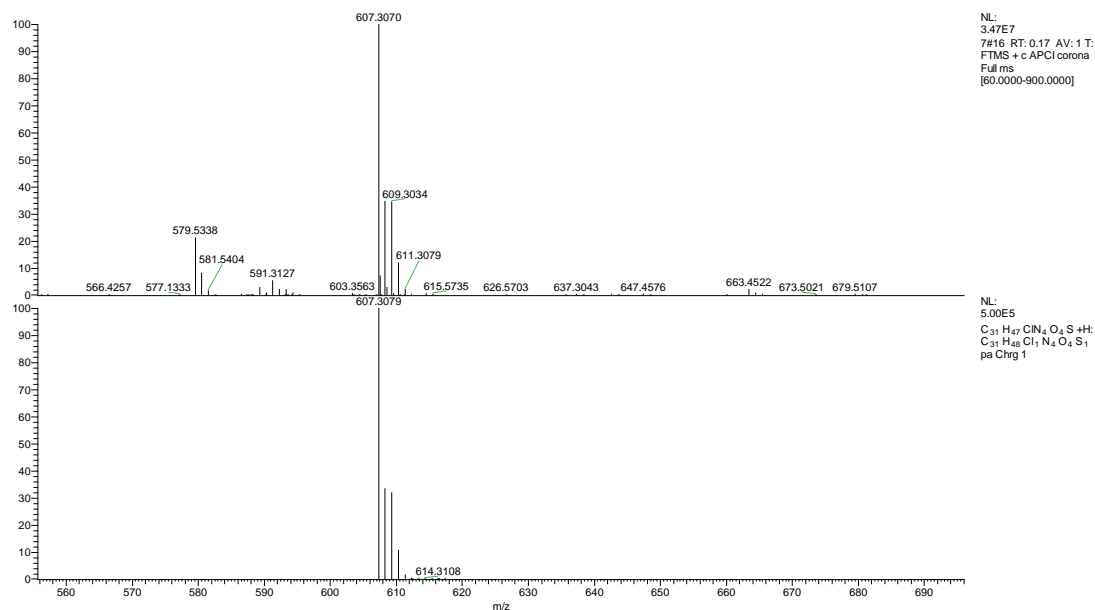

**Figure S93.** HRMS spectrum of **5g**.

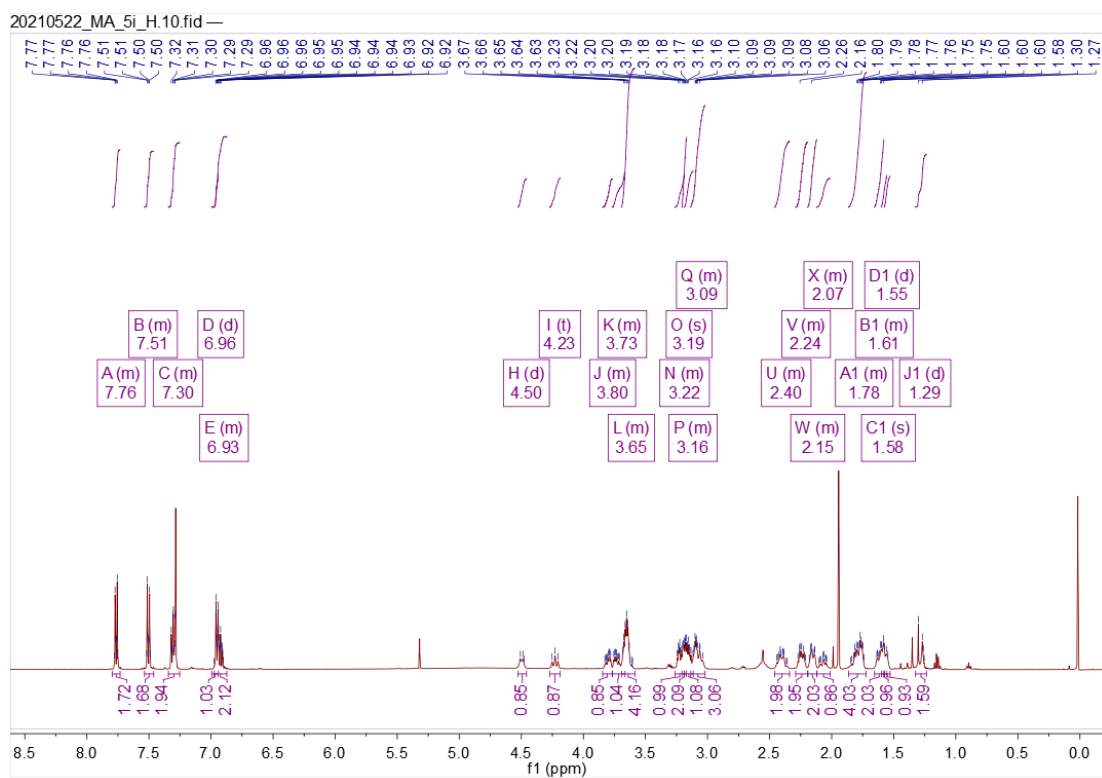

**Figure S94.** <sup>1</sup>H NMR spectrum (Chloroform-*d*, 500 MHz) of **5h**.

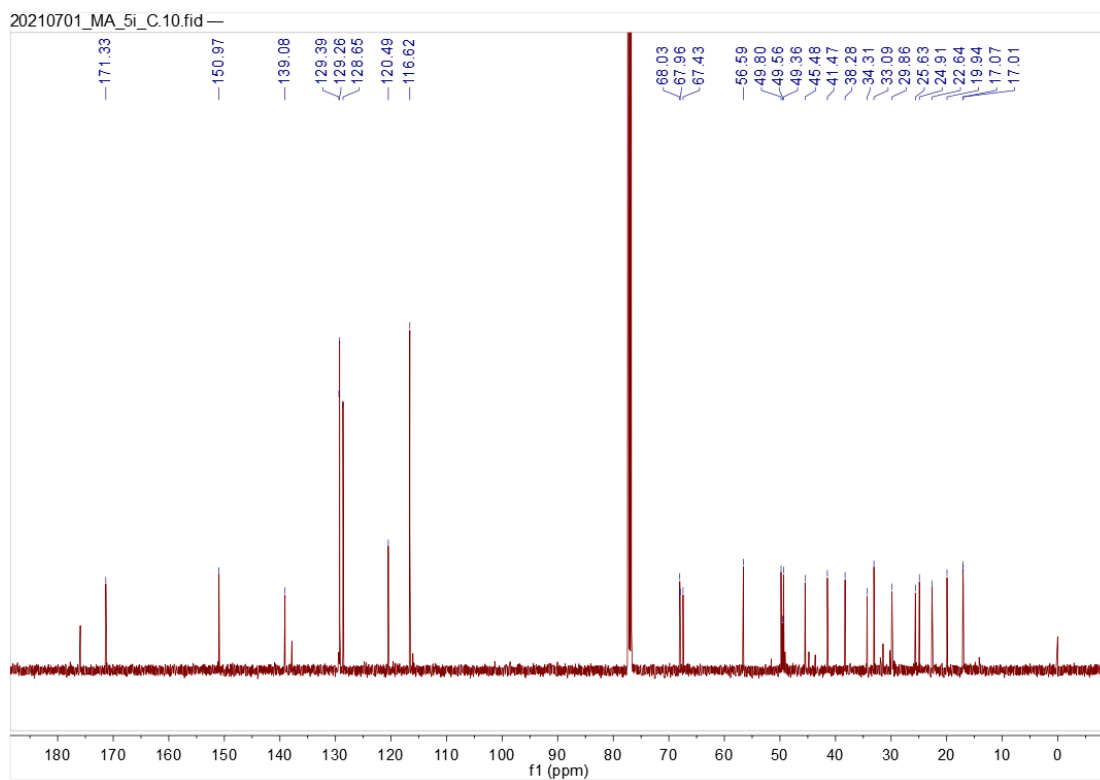

**Figure S95.**  $^{13}\text{C}$  NMR spectrum (Chloroform- $d$ , 126 MHz) of **5h**.

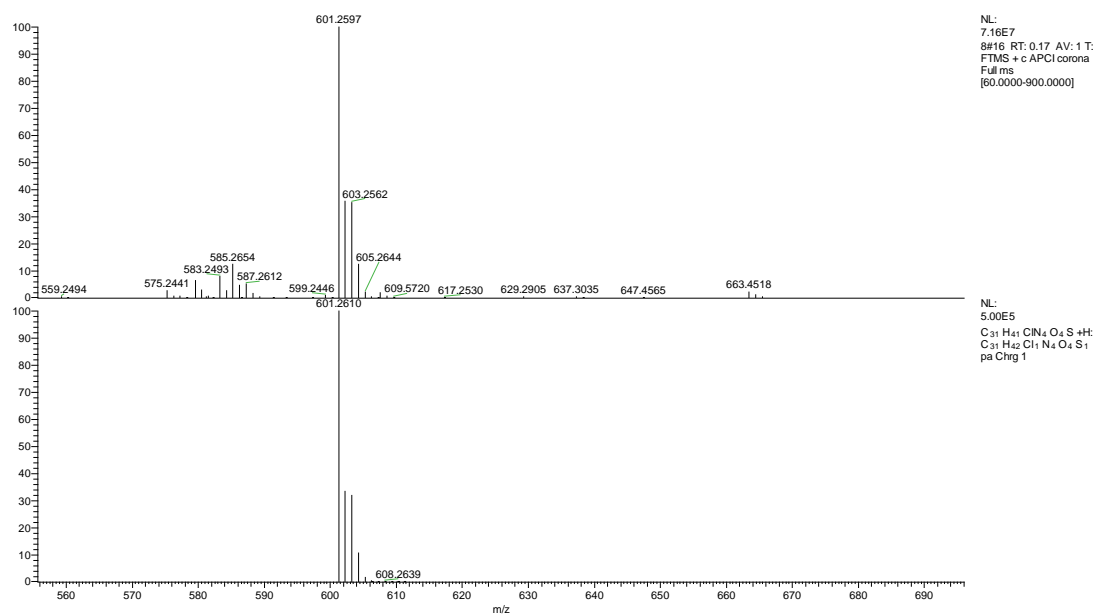

**Figure S96.** HRMS spectrum of **5h**.

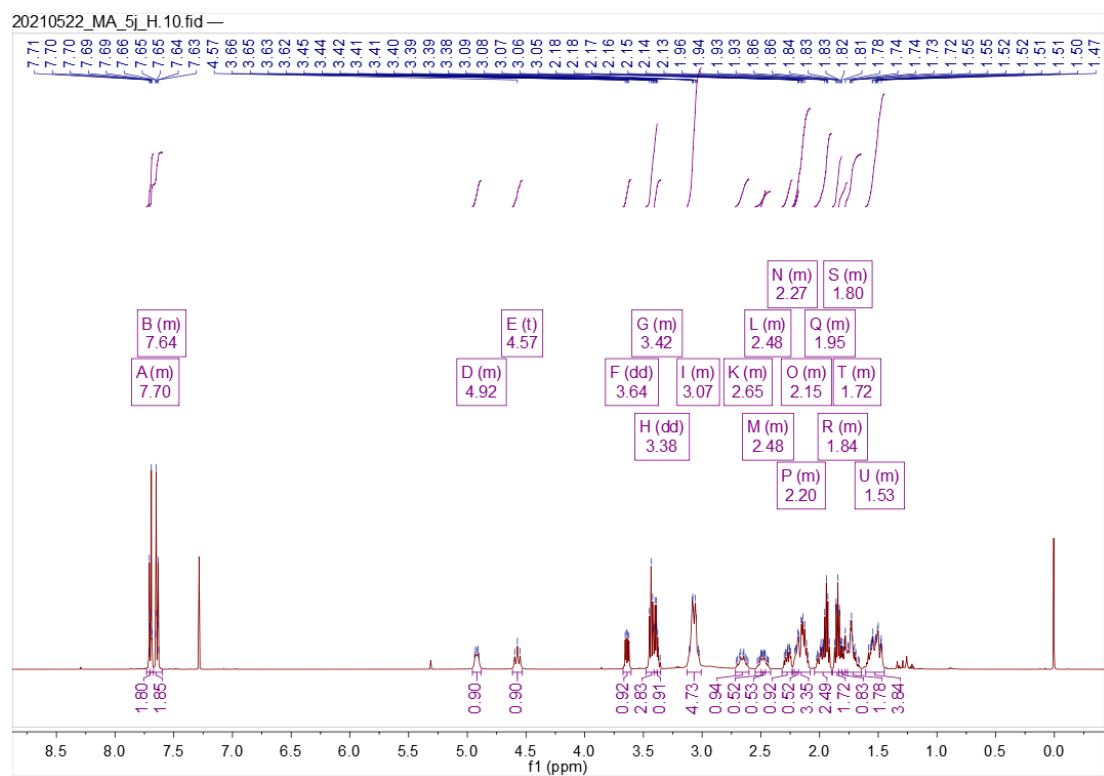

**Figure S97.**  $^1\text{H}$  NMR spectrum (Chloroform- $d$ , 500 MHz) of **5i**.

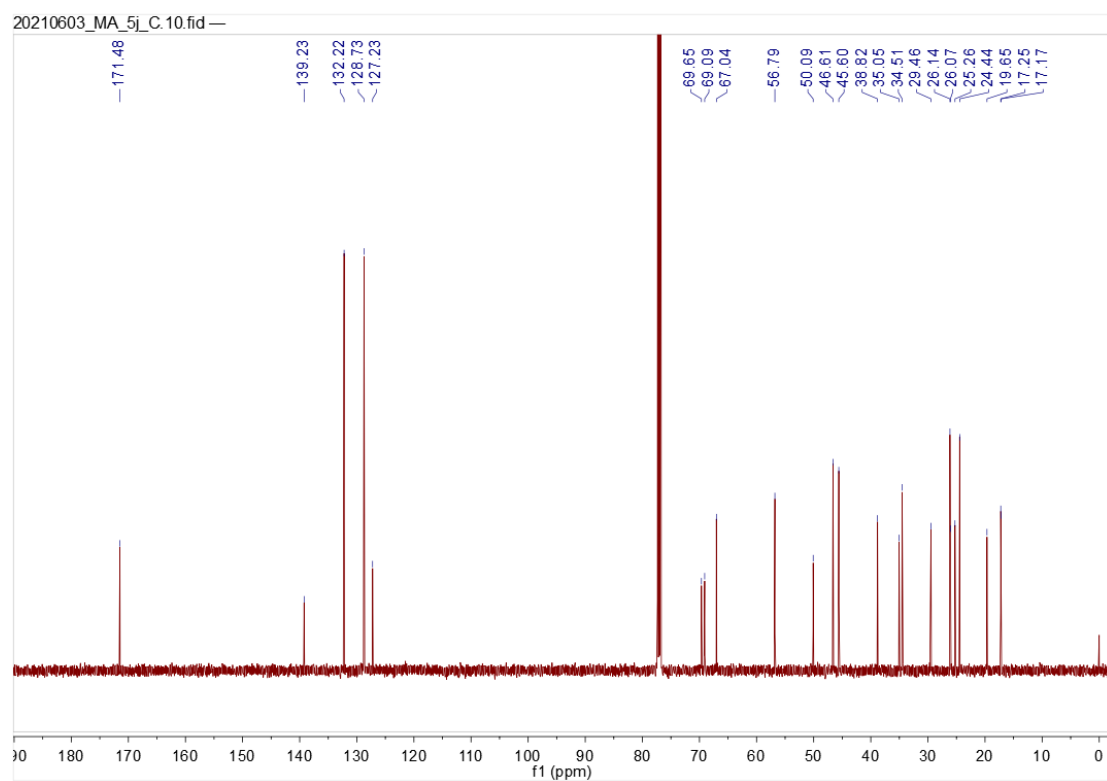

**Figure S98.**  $^{13}\text{C}$  NMR spectrum (Chloroform- $d$ , 126 MHz) of **5i**.



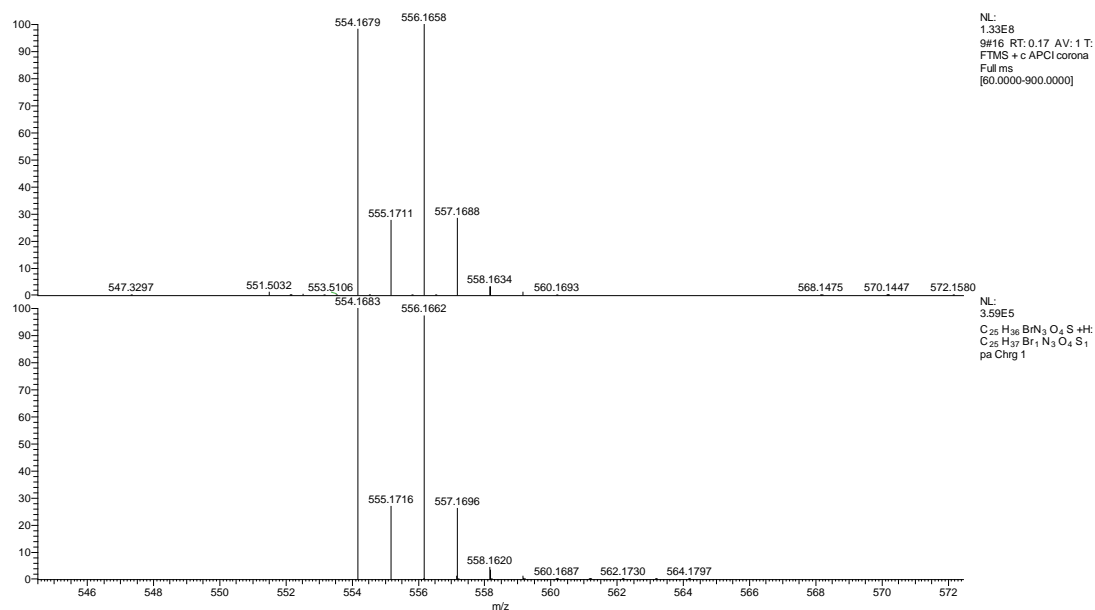

**Figure S99.** HRMS spectrum of **5i**.

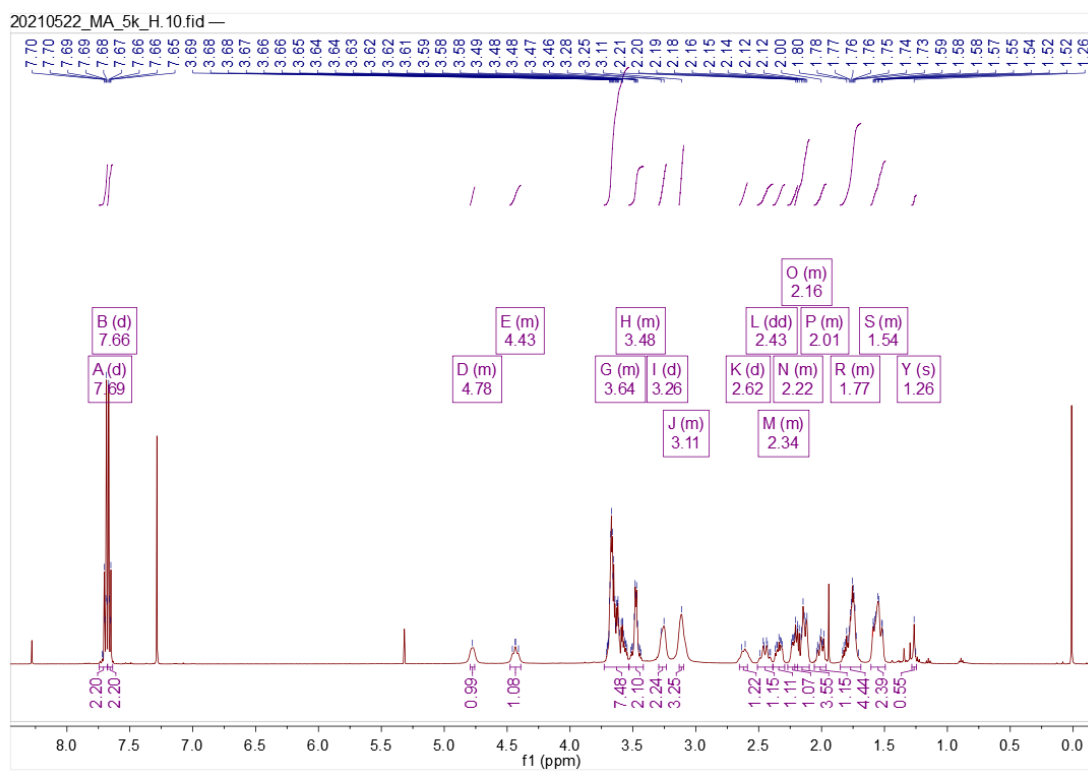

**Figure S100.** <sup>1</sup>H NMR spectrum (Chloroform-*d*, 500 MHz) of **5j**.

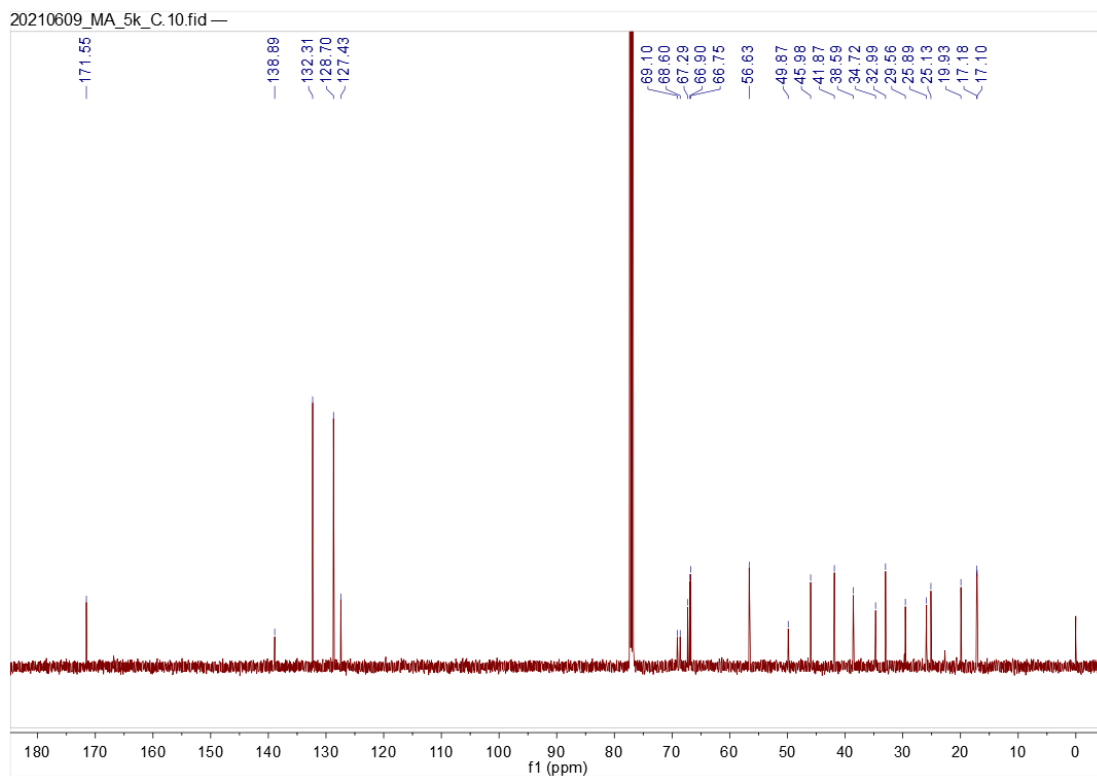

**Figure S101.**  $^{13}\text{C}$  NMR spectrum (Chloroform- $d$ , 126 MHz) of **5j**.

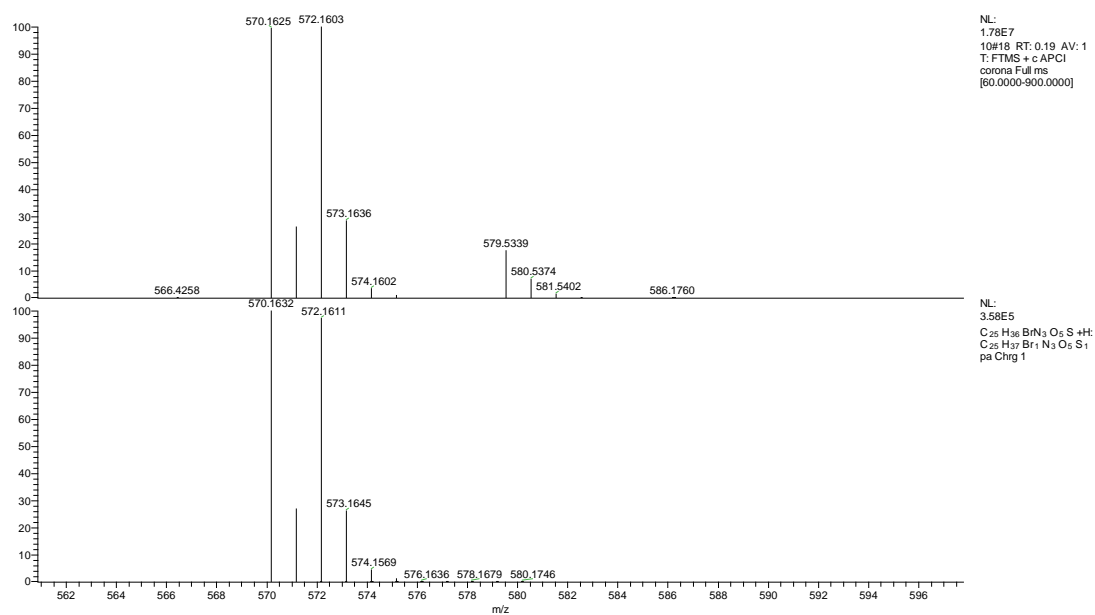

**Figure S102.** HRMS spectrum of **5j**.

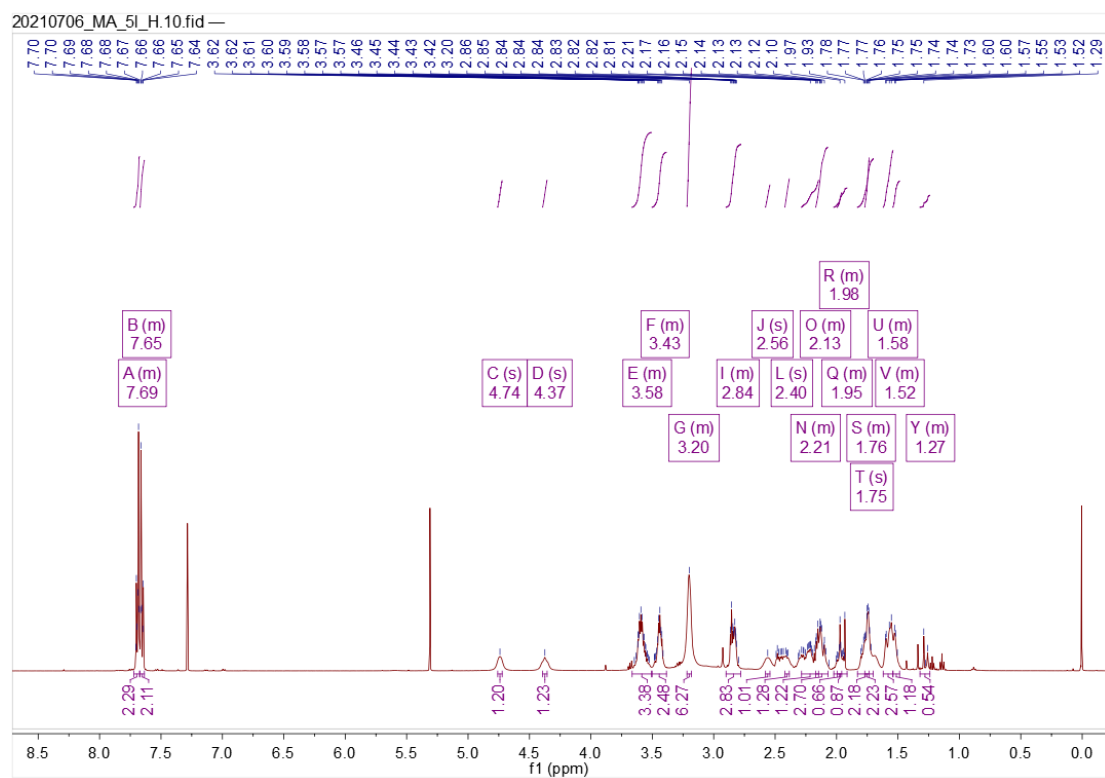

**Figure S103.**  $^1\text{H}$  NMR spectrum (Chloroform- $d$ , 500 MHz) of **5k**.

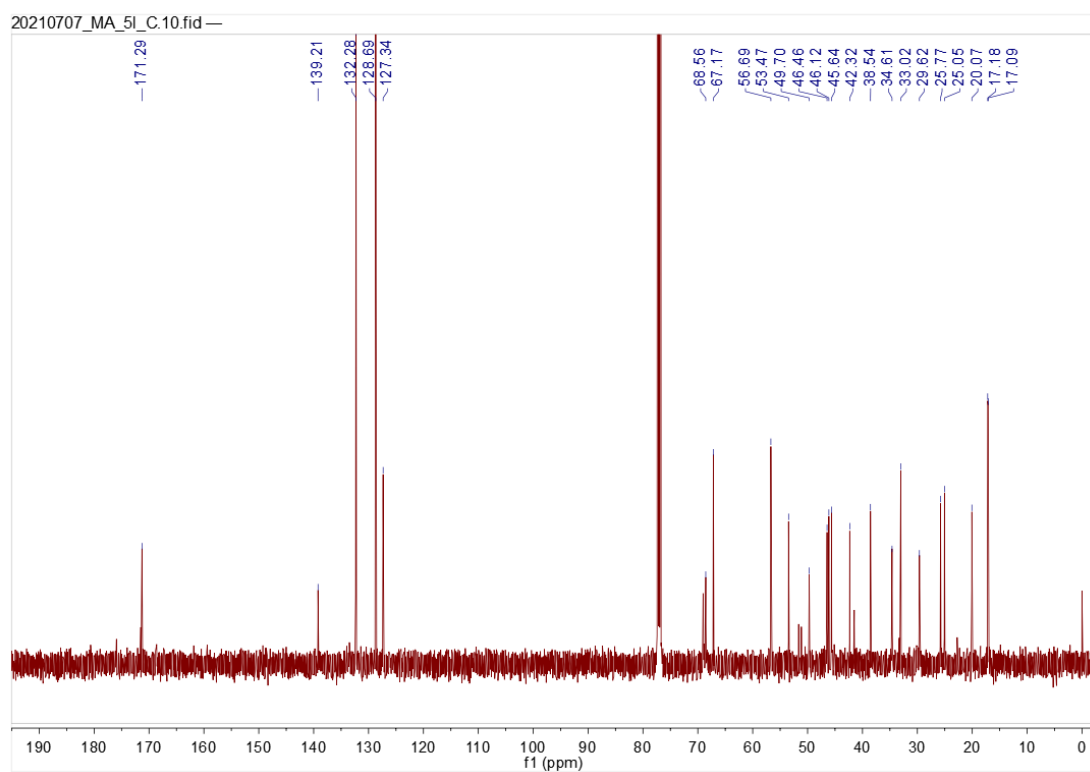

**Figure S104.**  $^{13}\text{C}$  NMR spectrum (Chloroform- $d$ , 126 MHz) of **5k**.

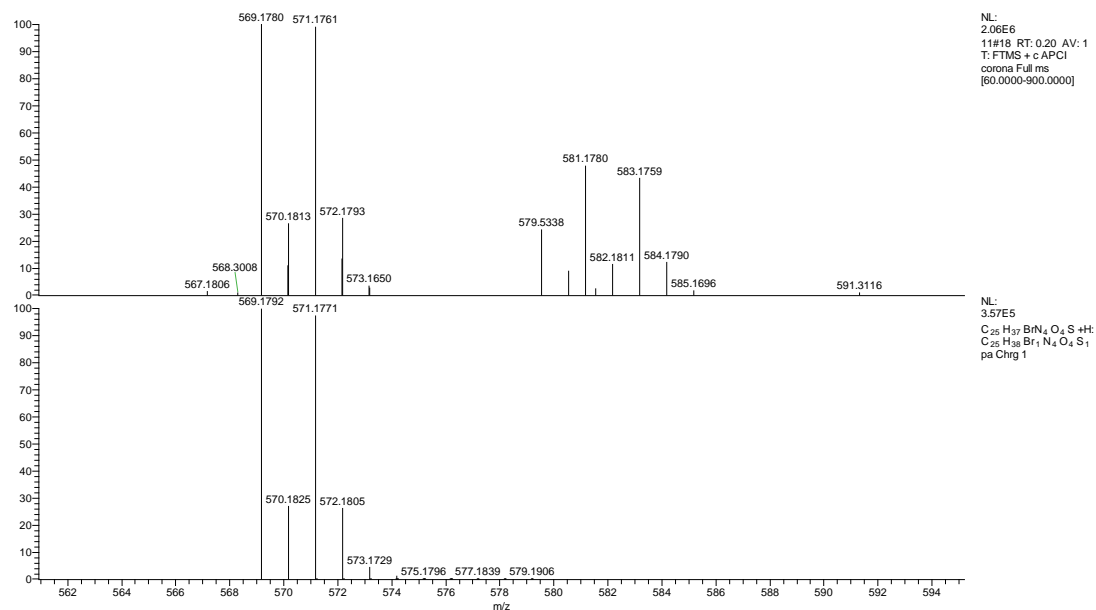

**Figure S105.** HRMS spectrum of **5k**.

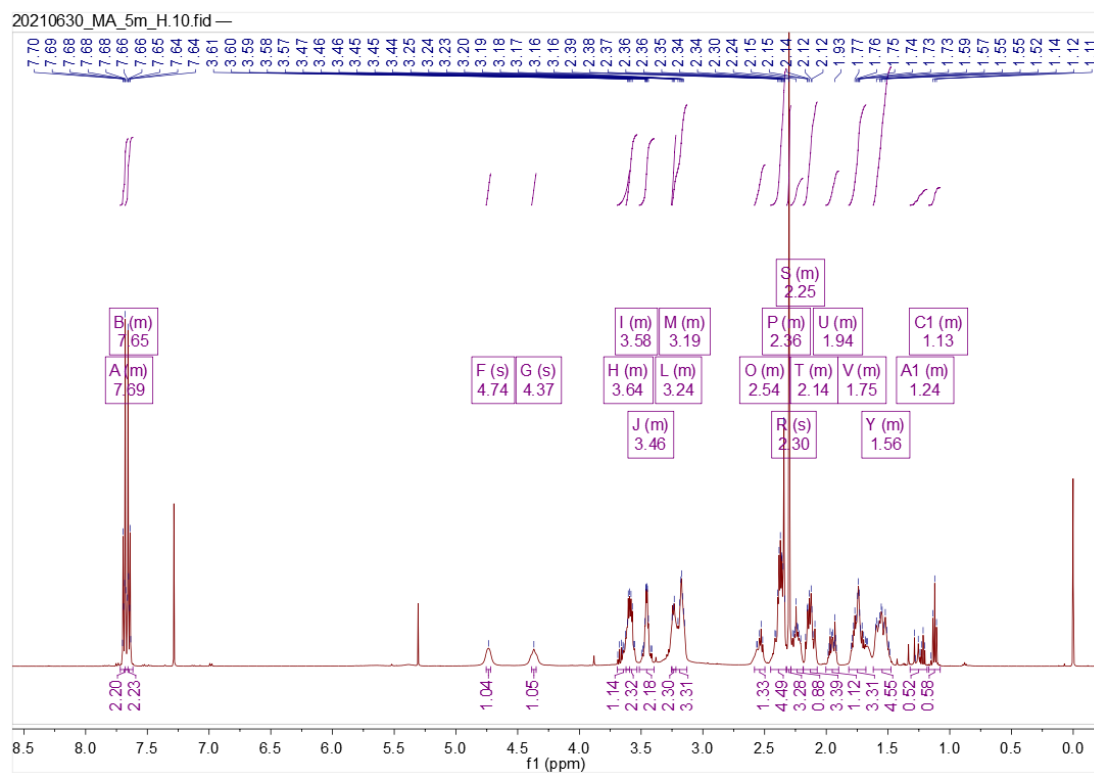

**Figure S106.** <sup>1</sup>H NMR spectrum (Chloroform-*d*, 500 MHz) of **5l**.

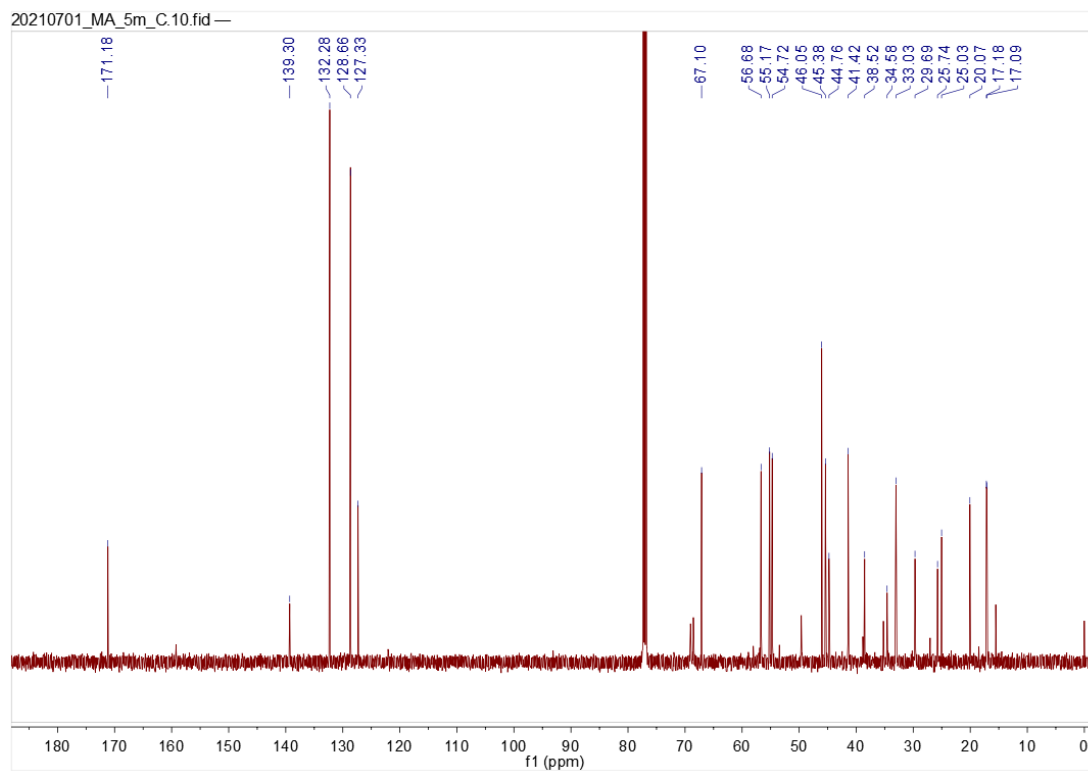

**Figure S107.**  $^{13}\text{C}$  NMR spectrum (Chloroform- $d$ , 126 MHz) of **5l**.

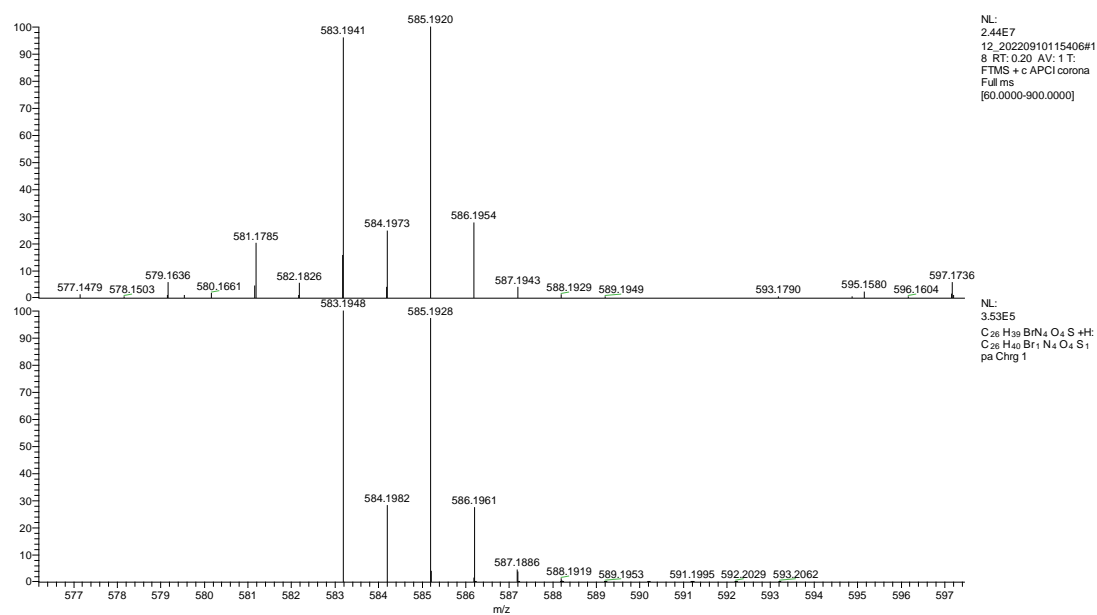

**Figure S108.** HRMS spectrum of **5l**.

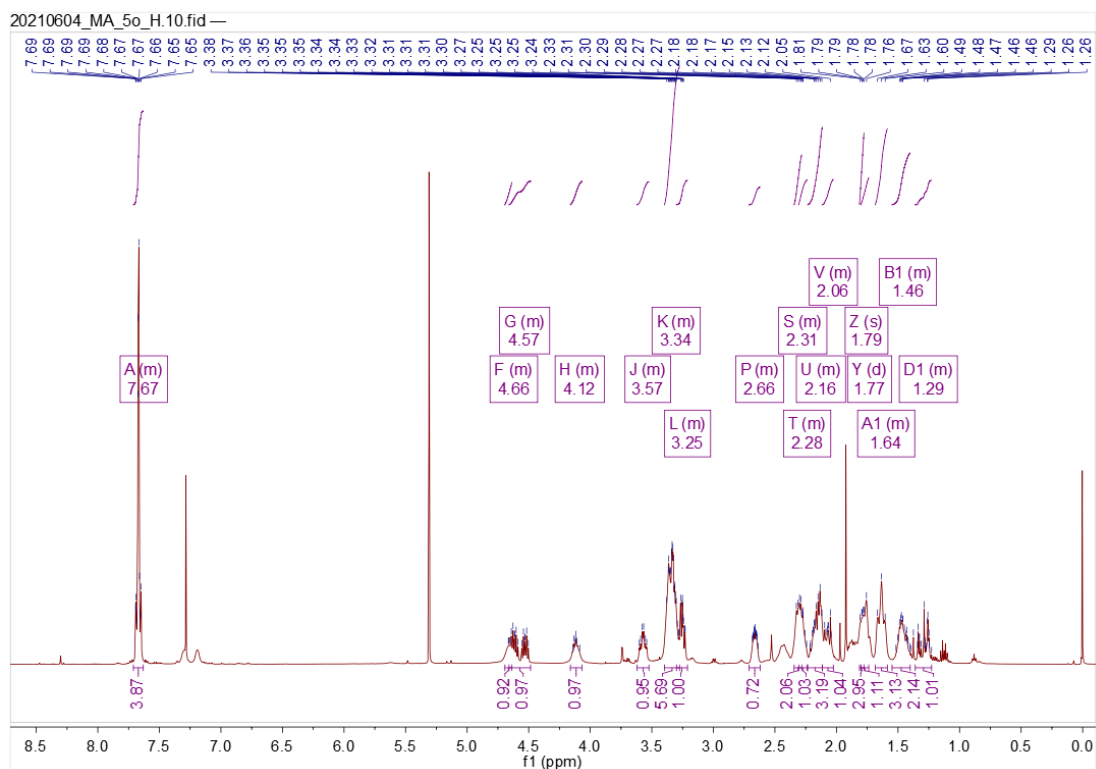

**Figure S109.**  $^1\text{H}$  NMR spectrum (Chloroform- $d$ , 500 MHz) of **5m**.

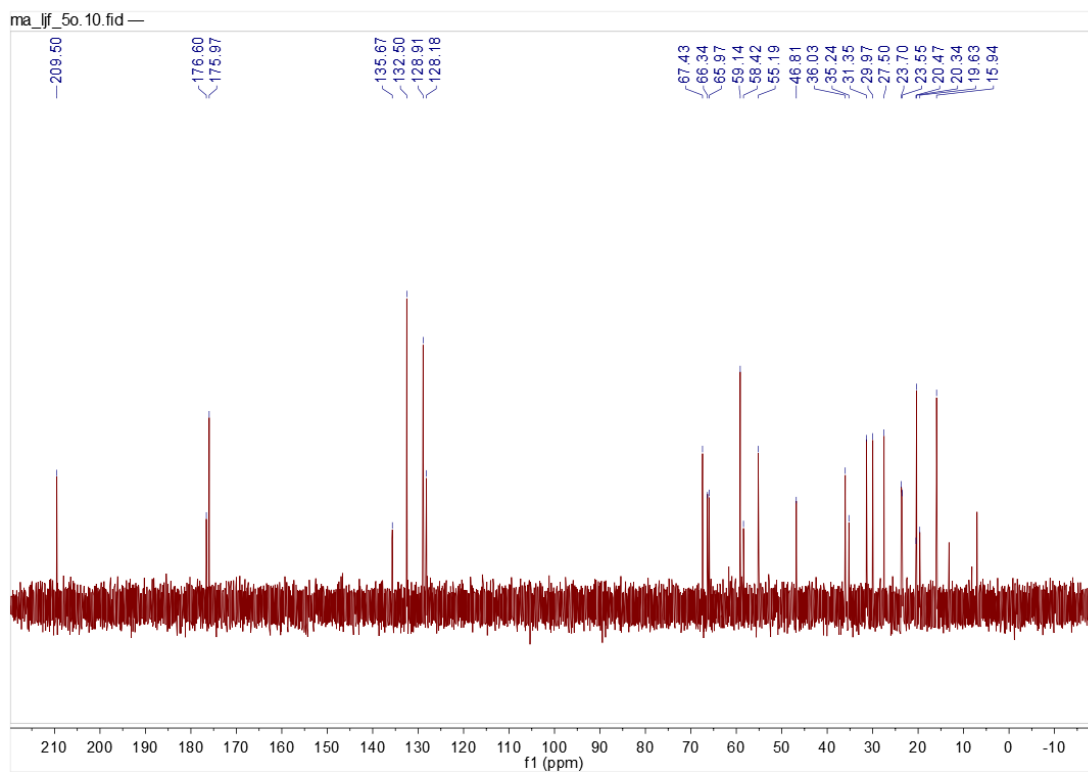

**Figure S110.**  $^{13}\text{C}$  NMR spectrum (Chloroform- $d$ , 126 MHz) of **5m**.

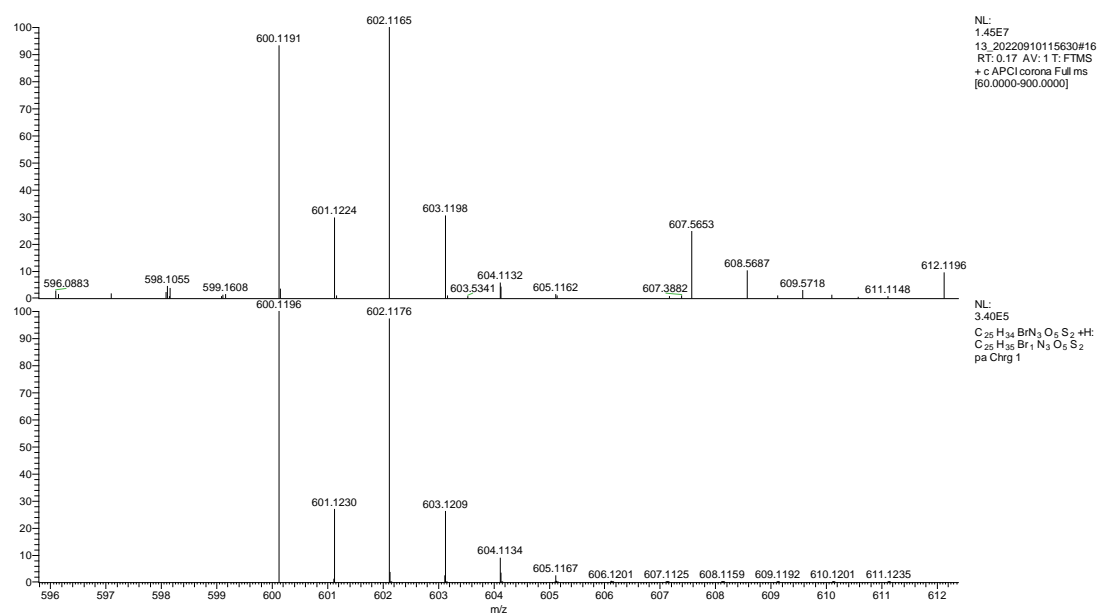

**Figure S111.** HRMS spectrum of **5m**.

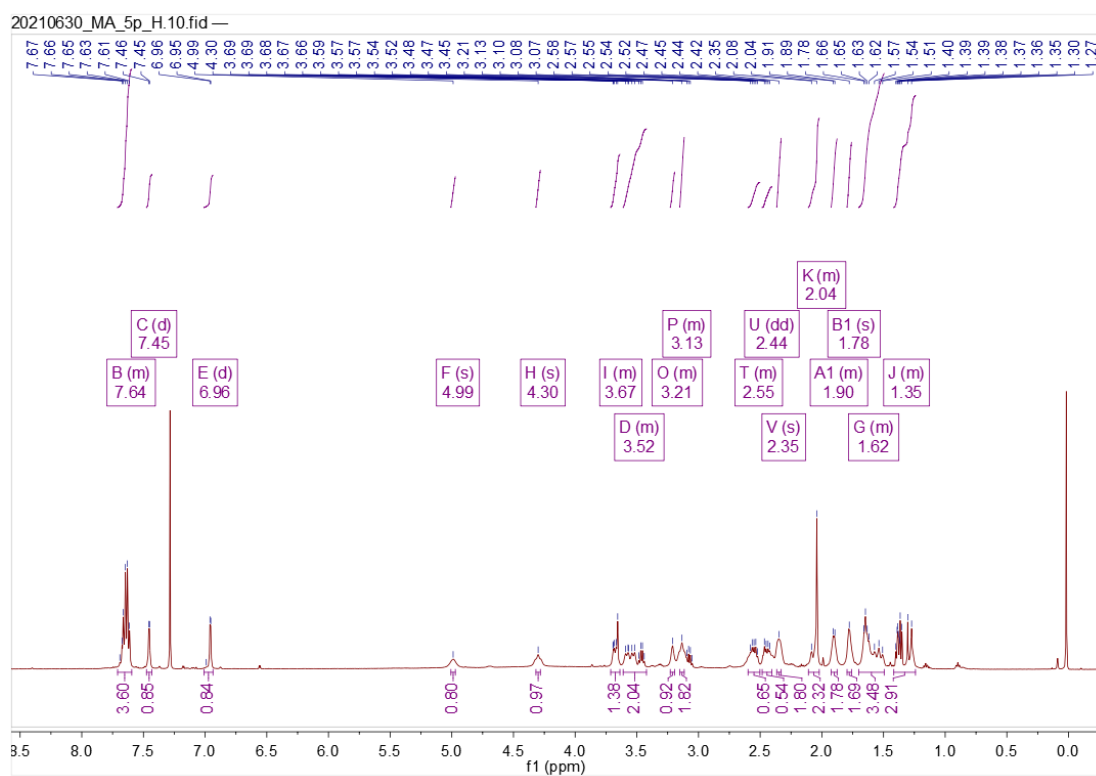

**Figure S112.** <sup>1</sup>H NMR spectrum (Chloroform-*d*, 500 MHz) of **5n**.

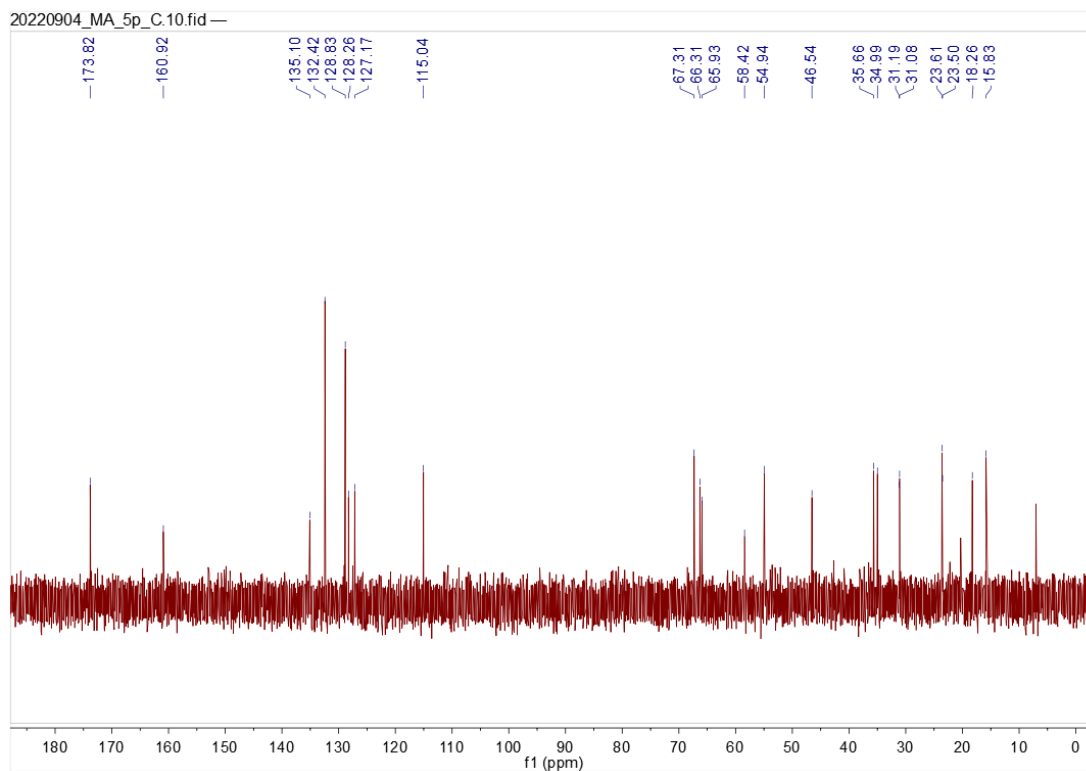

**Figure S113.**  $^{13}\text{C}$  NMR spectrum (Deuterium Oxide, 126 MHz) of **5n**.

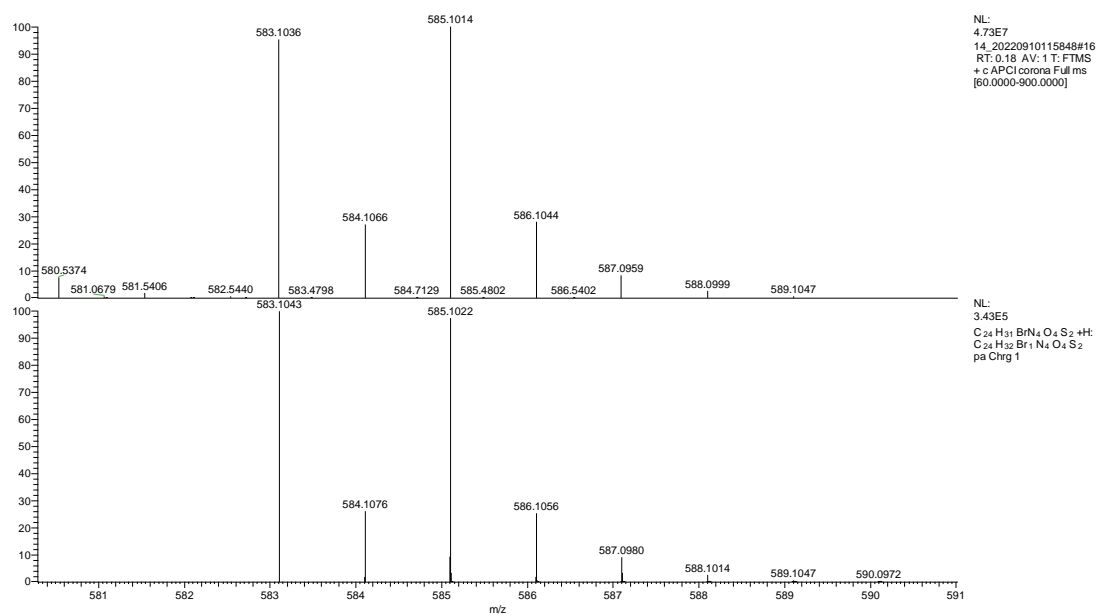

**Figure S114.** HRMS spectrum of **5n**.



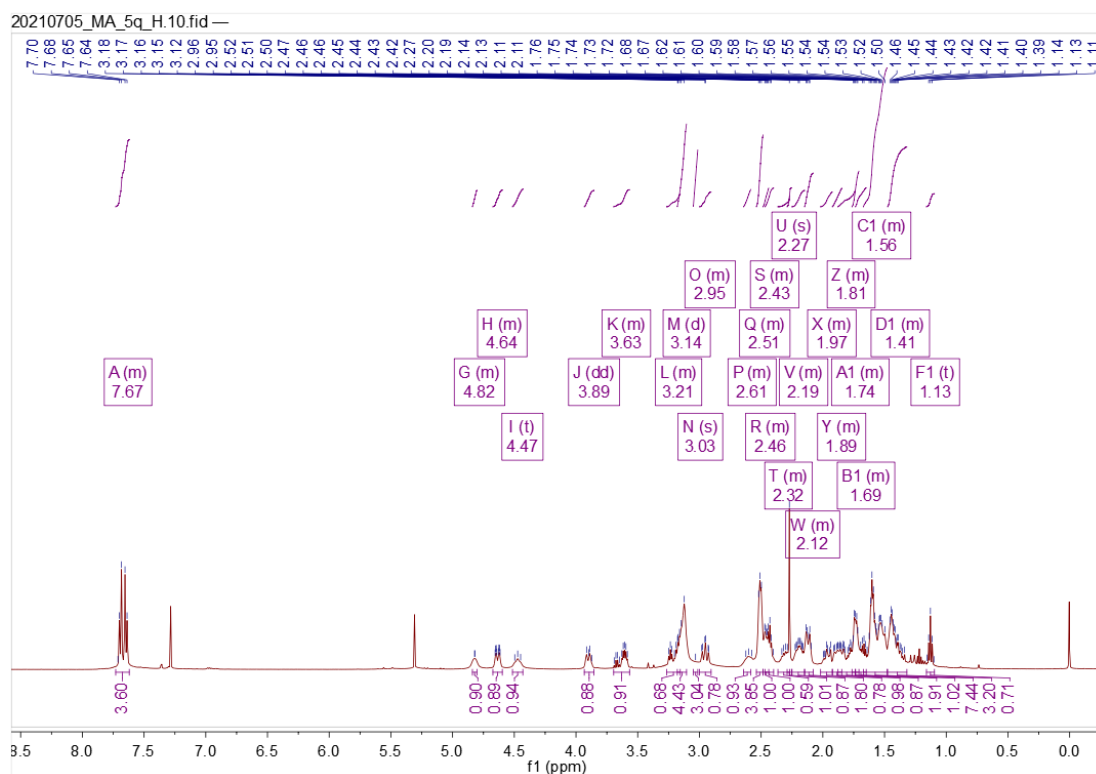

**Figure S115.**  $^1\text{H}$  NMR spectrum (Chloroform-*d*, 500 MHz) of **5o**.

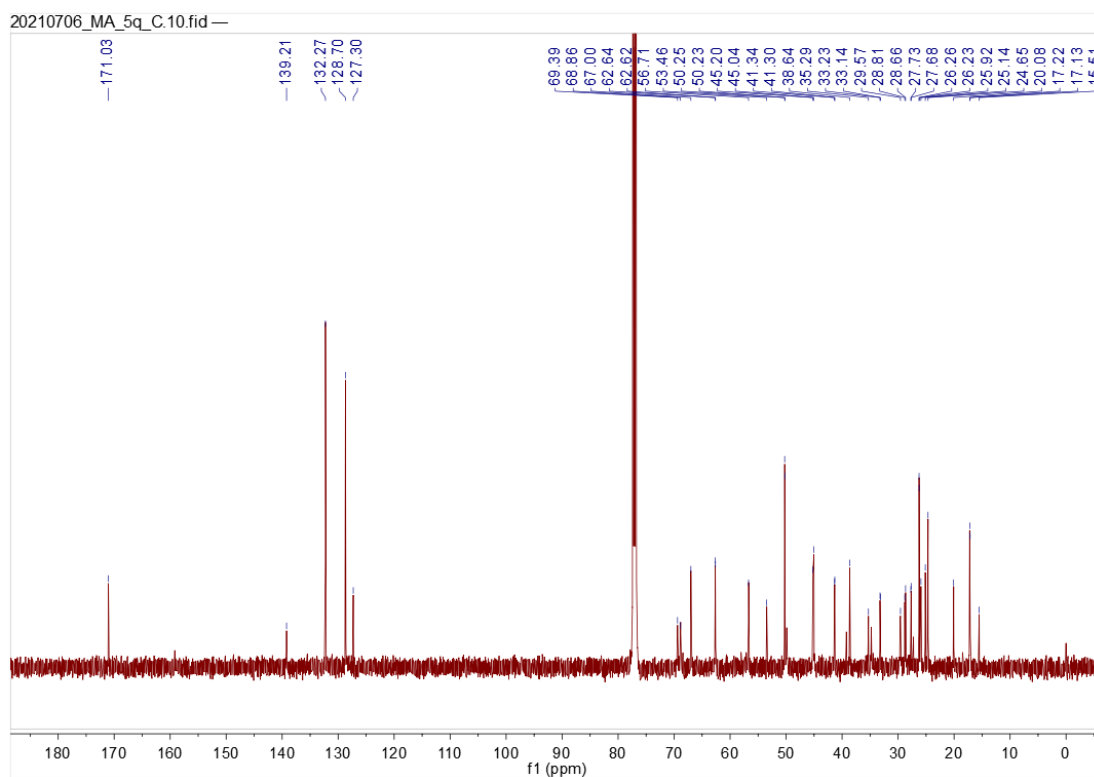

**Figure S116.**  $^{13}\text{C}$  NMR spectrum (Chloroform-*d*, 126 MHz) of **5o**.

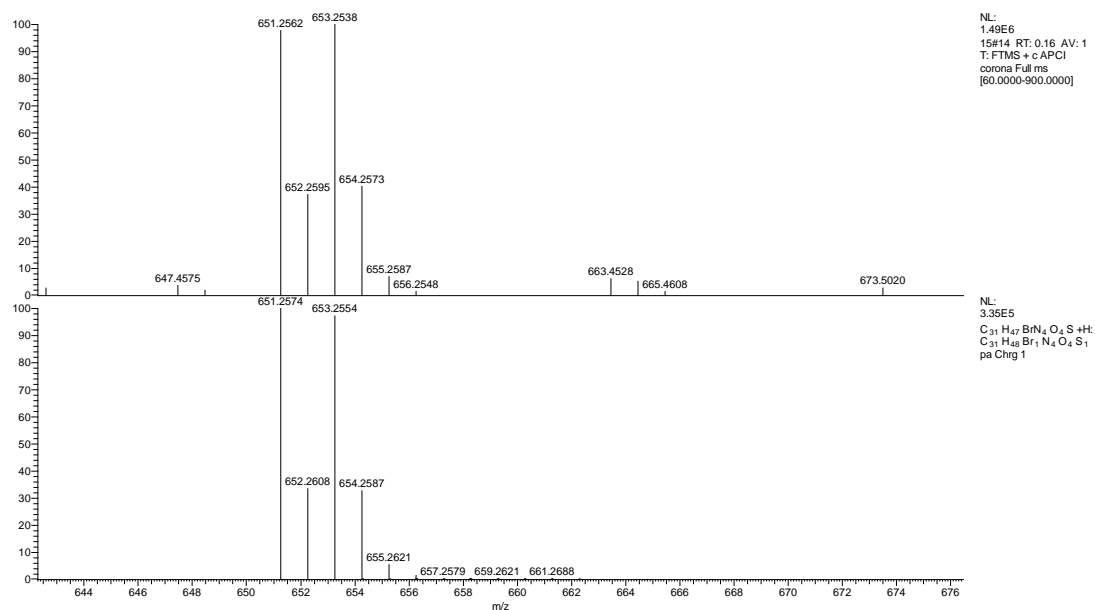

**Figure S117.** HRMS spectrum of **5o**.

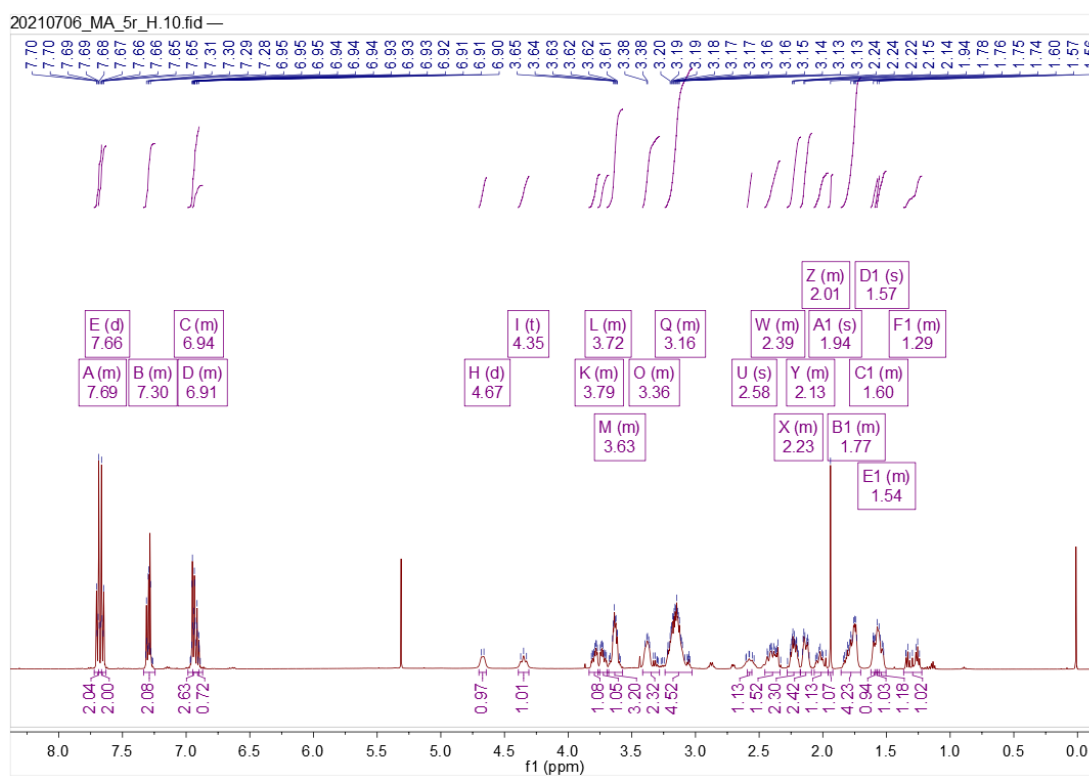

**Figure S118.** <sup>1</sup>H NMR spectrum (Chloroform-*d*, 500 MHz) of **5p**.

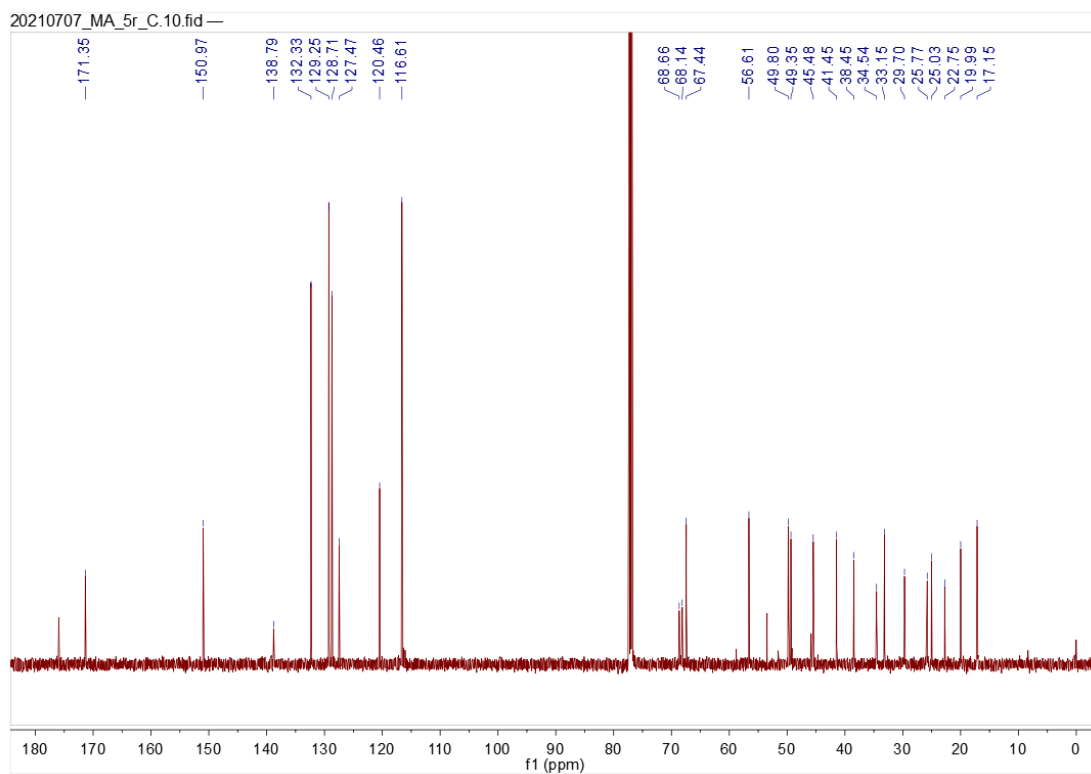

**Figure S119.**  $^{13}\text{C}$  NMR spectrum (Chloroform- $d$ , 126 MHz) of **5p**.

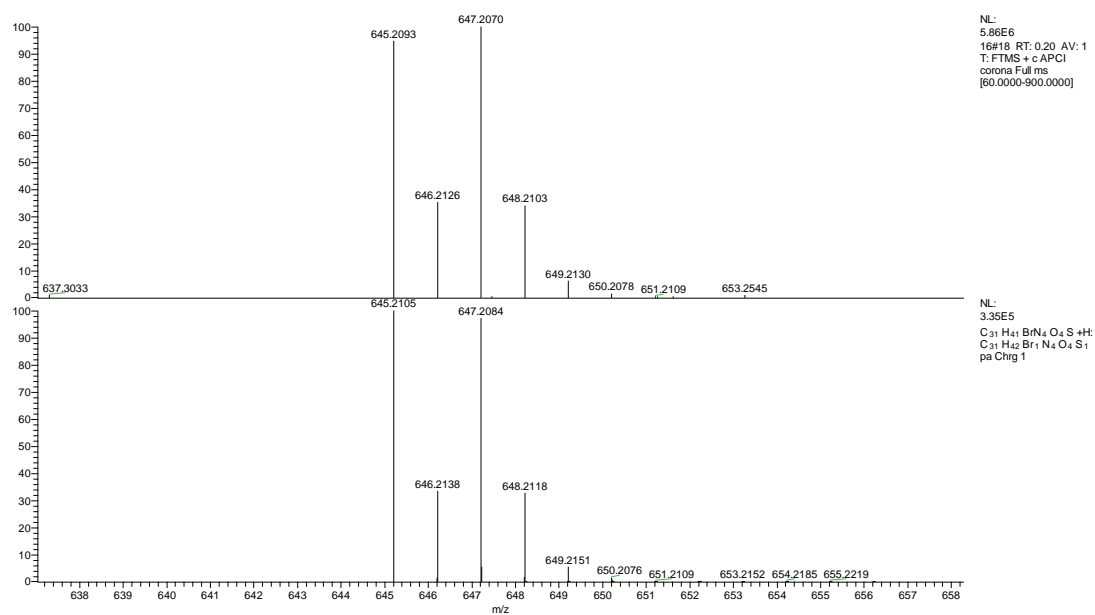

**Figure S120.** HRMS spectrum of **5p**.

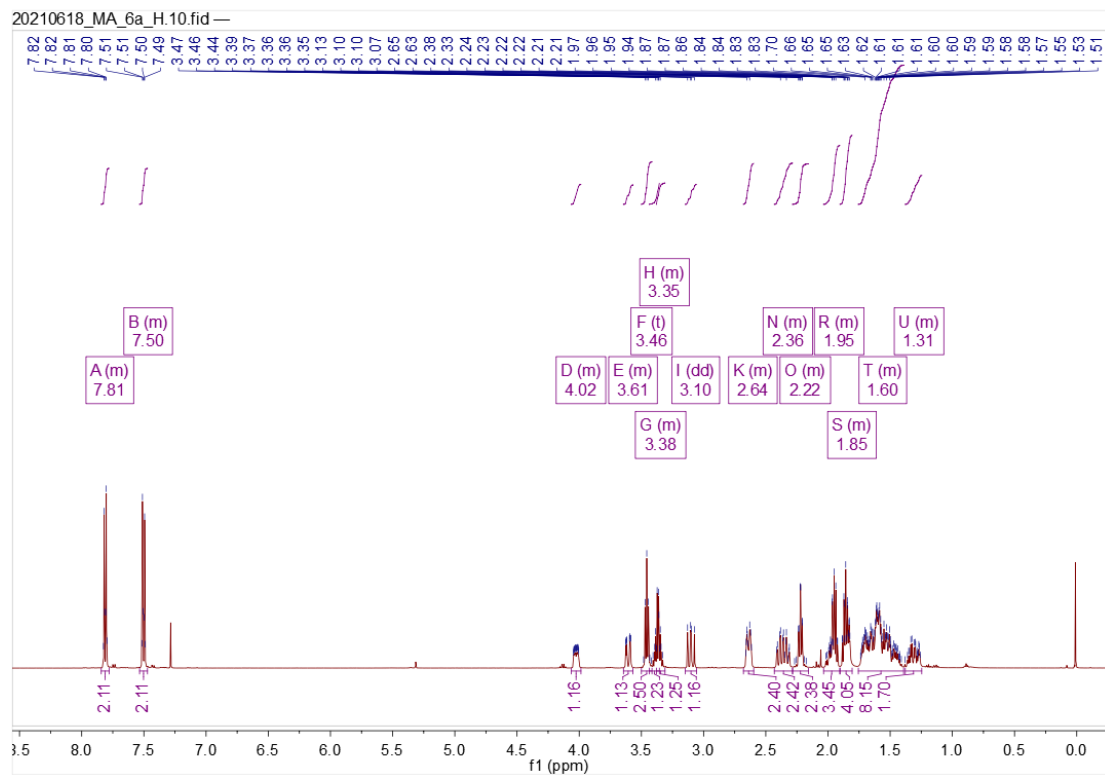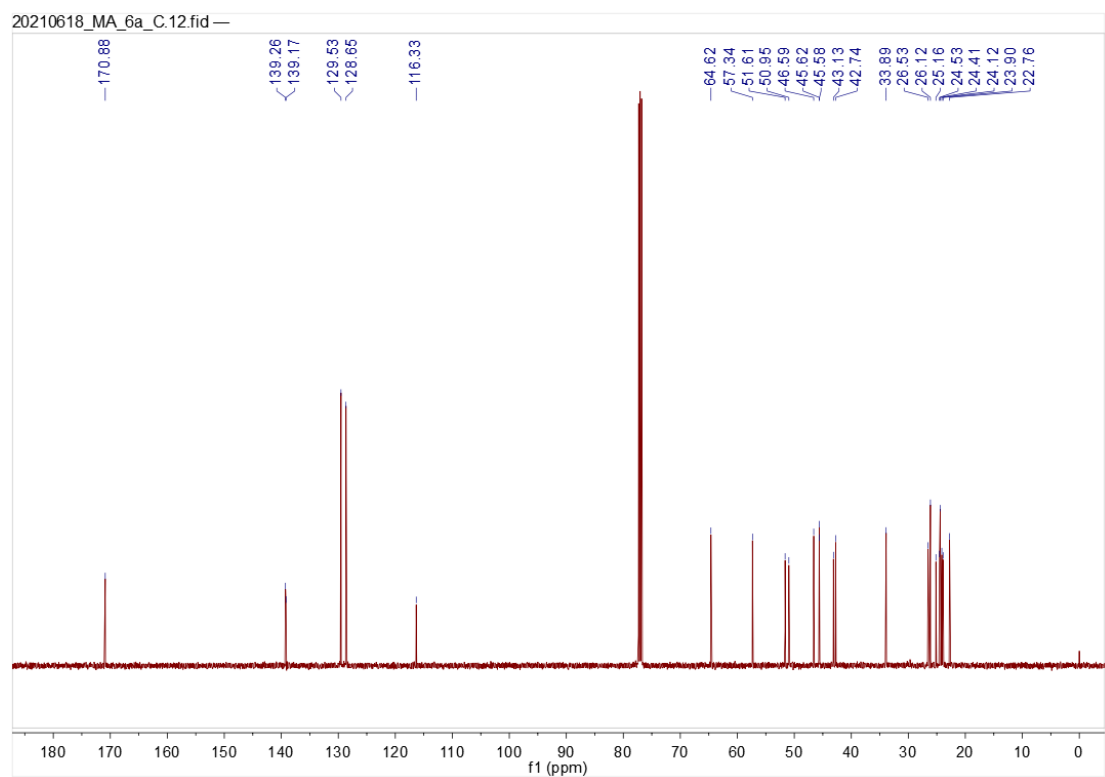

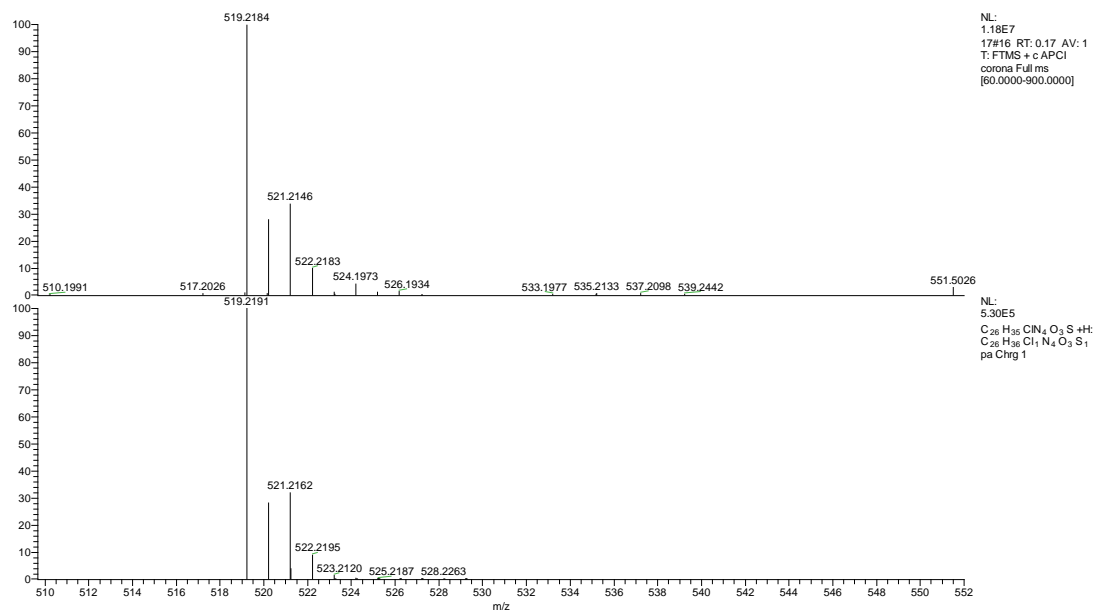

**Figure S123.** HRMS spectrum of **6a**.

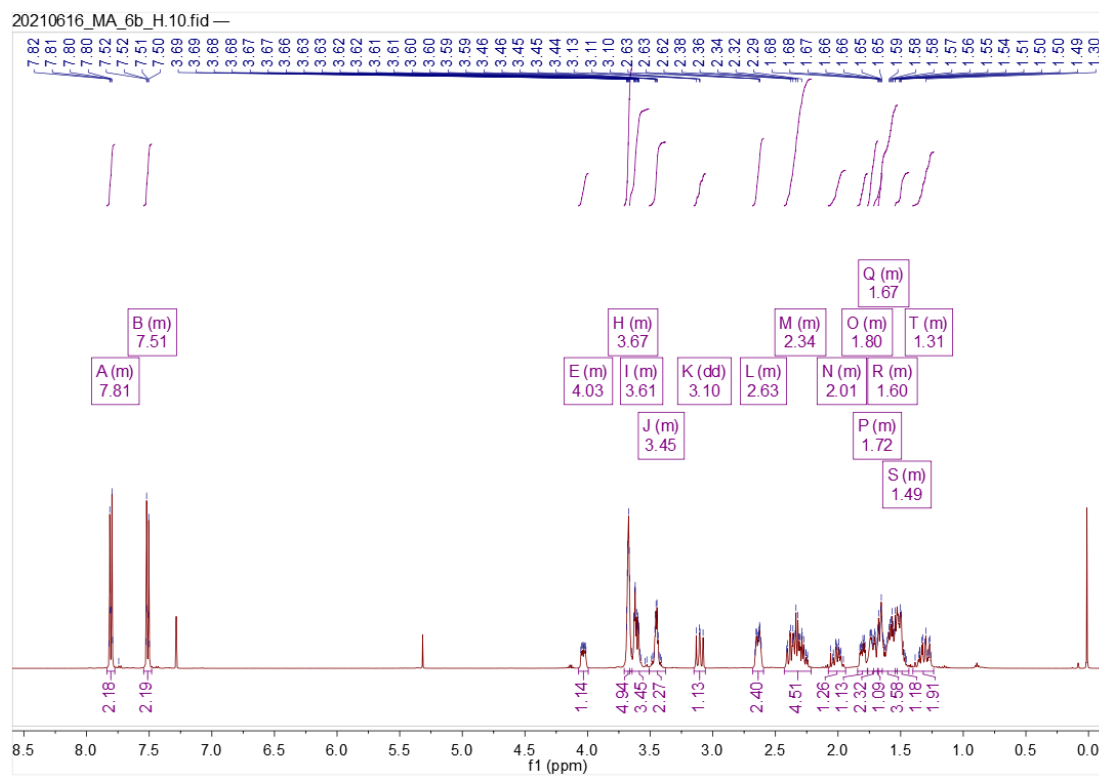

**Figure S124.** <sup>1</sup>H NMR spectrum (Chloroform-*d*, 500 MHz) of **6b**.

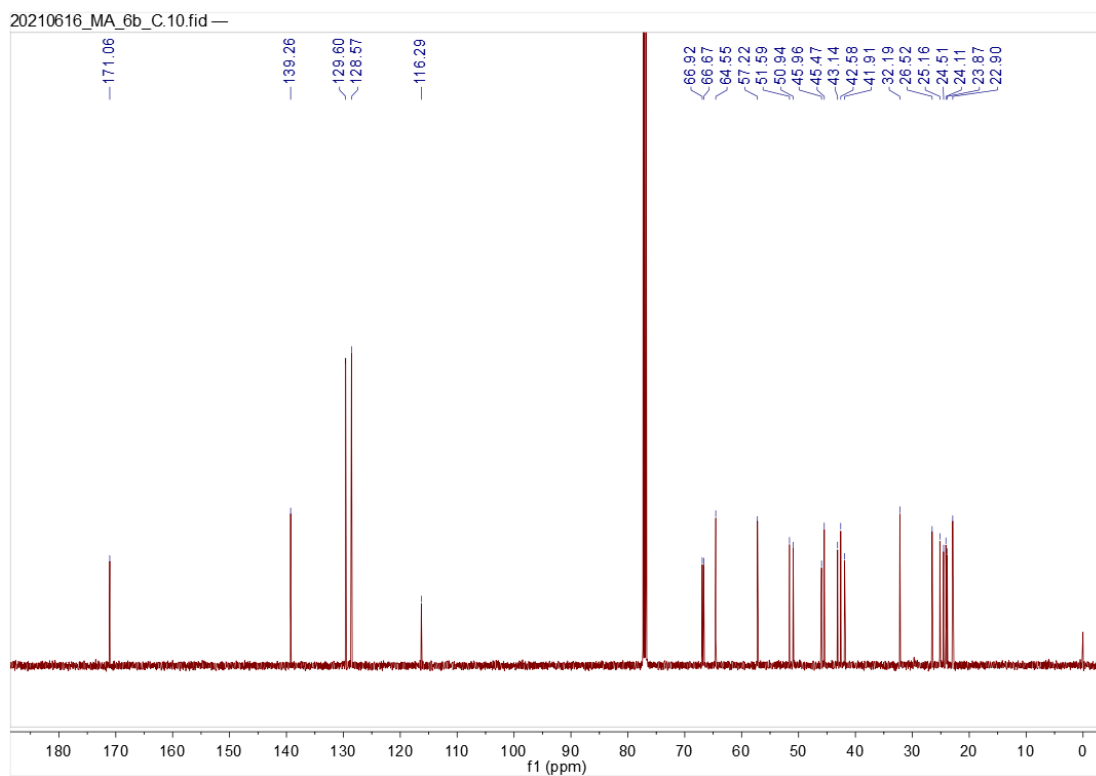

**Figure S125.**  $^{13}\text{C}$  NMR spectrum (Chloroform- $d$ , 126 MHz) of **6b**.

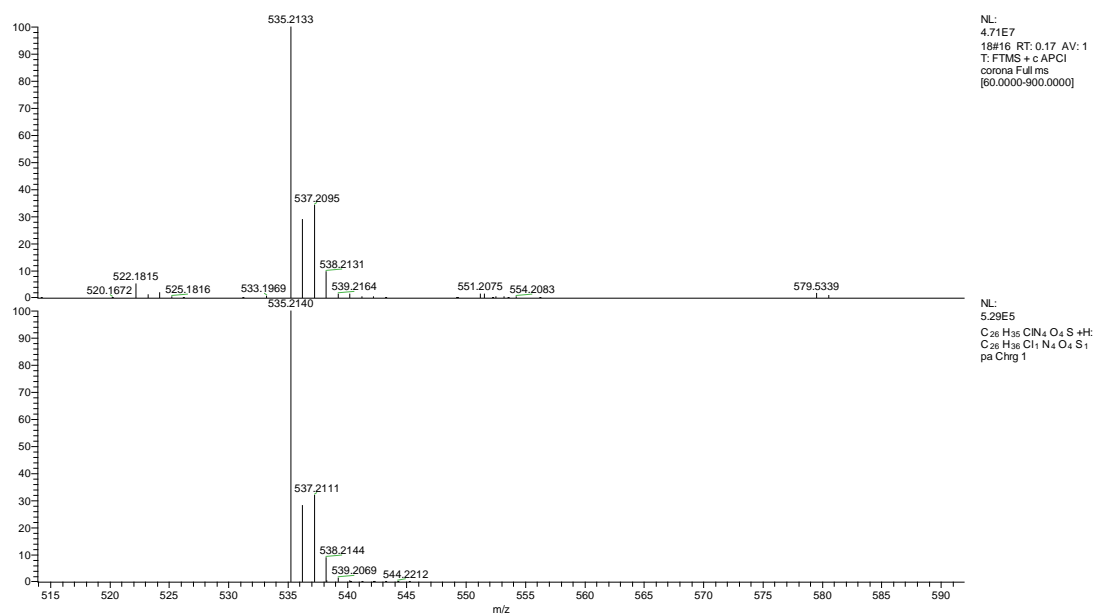

**Figure S126.** HRMS spectrum of **6b**.

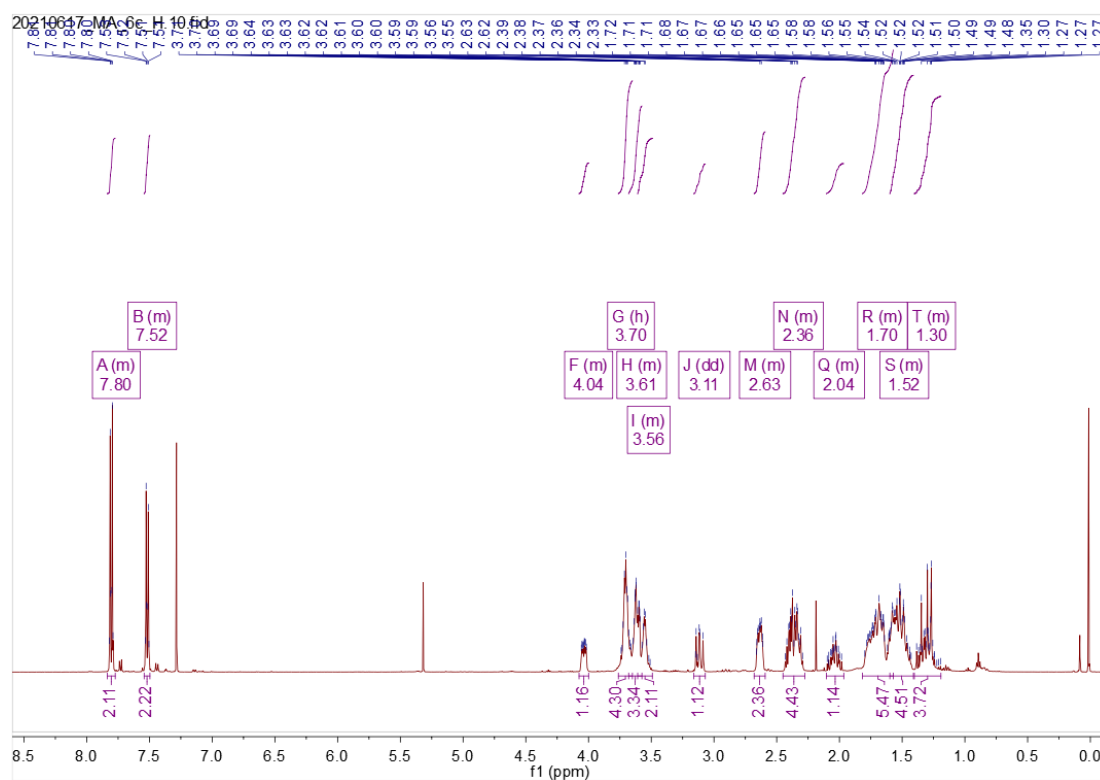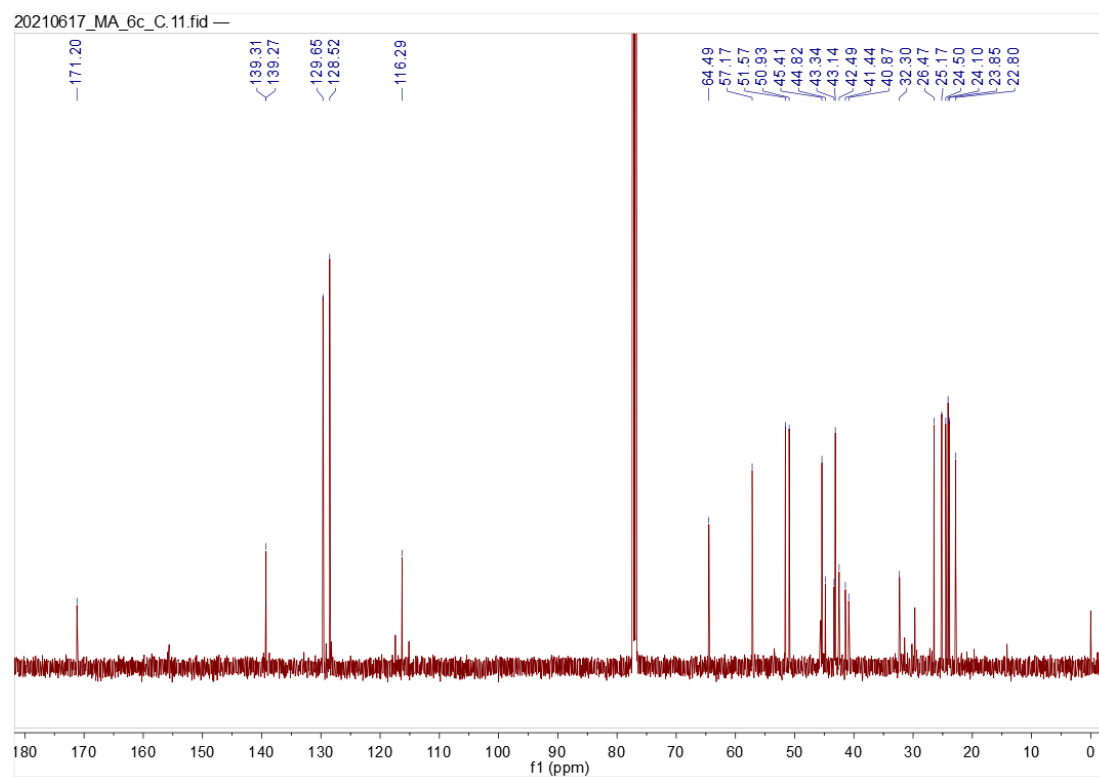

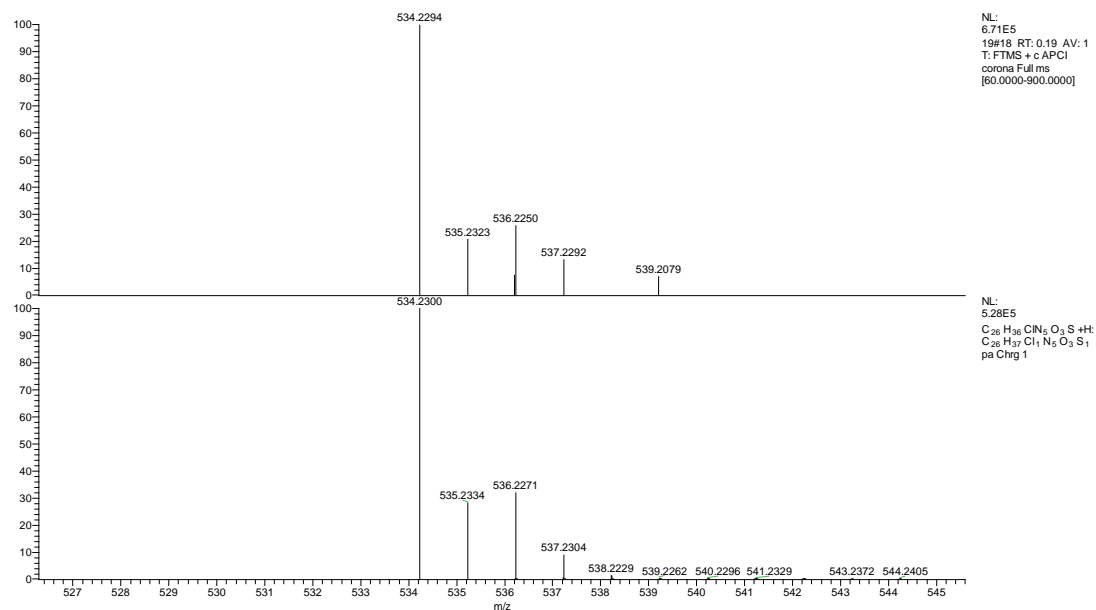

**Figure S129.** HRMS spectrum of **6c**.

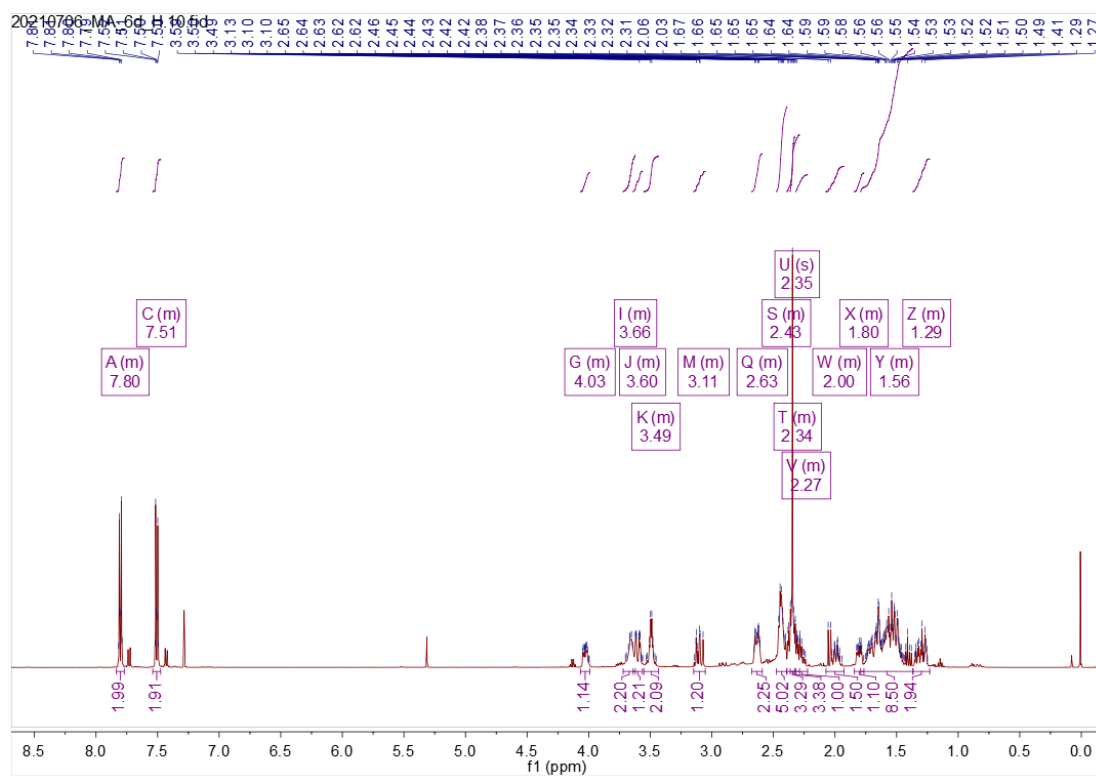

**Figure S130.** <sup>1</sup>H NMR spectrum (Chloroform-*d*, 500 MHz) of **6d**.



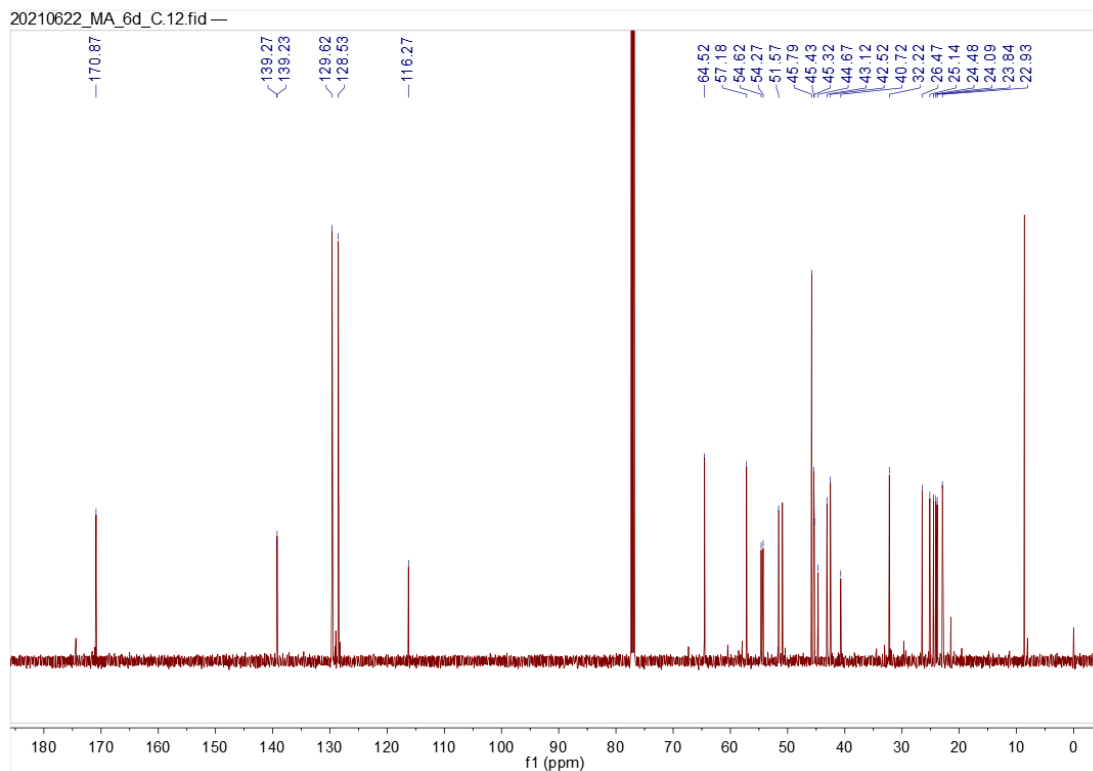

**Figure S131.**  $^{13}\text{C}$  NMR spectrum (Chloroform-*d*, 126 MHz) of **6d**.

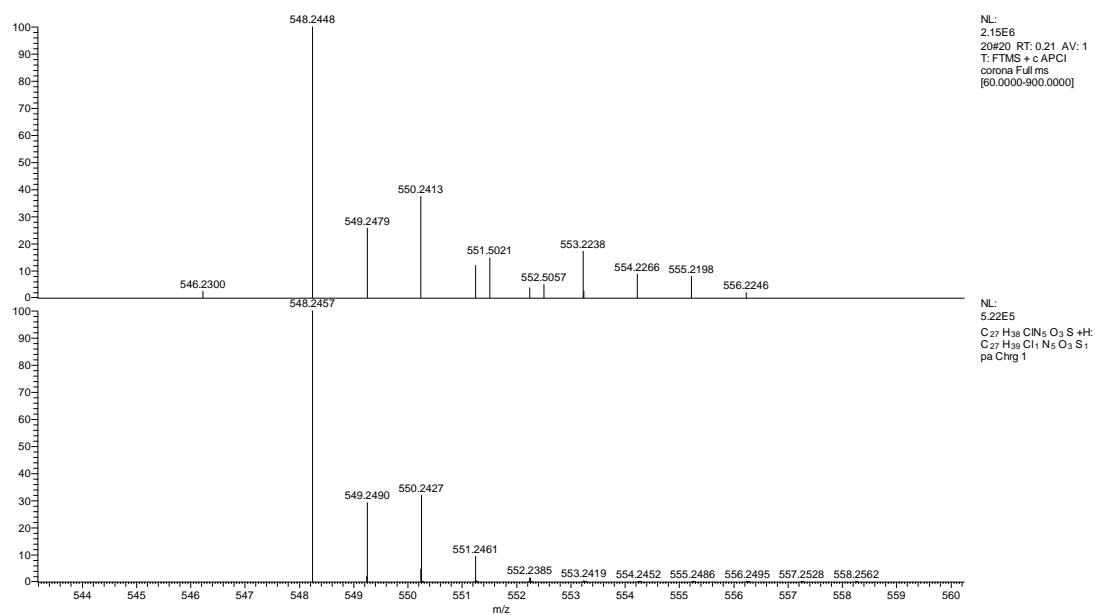

**Figure S132.** HRMS spectrum of **6d**.

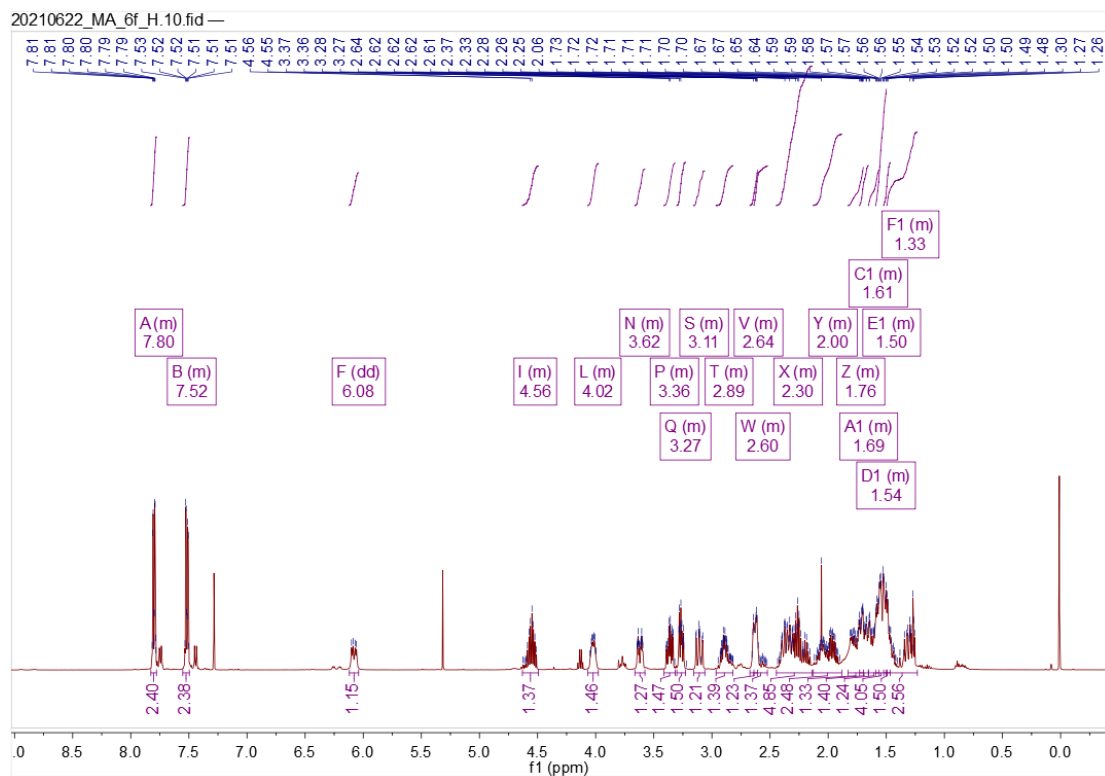

**Figure S133.**  $^1\text{H}$  NMR spectrum (Chloroform- $d$ , 500 MHz) of **6e**.

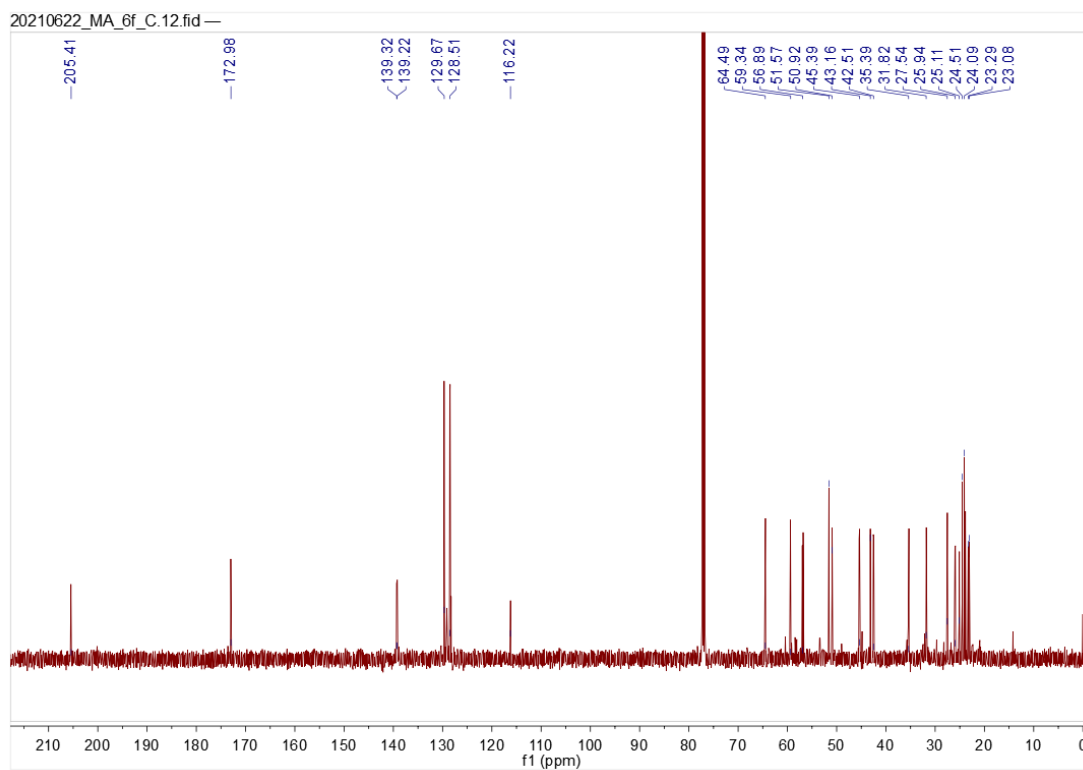

**Figure S134.**  $^{13}\text{C}$  NMR spectrum (Chloroform- $d$ , 126 MHz) of **6e**.

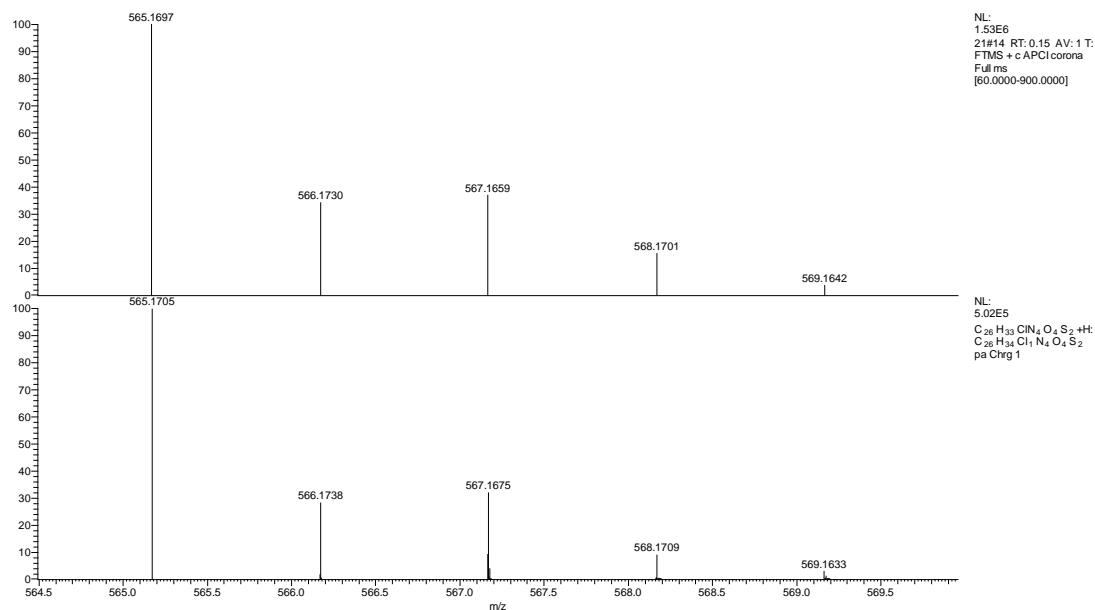

**Figure S135.** HRMS spectrum of **6e**.

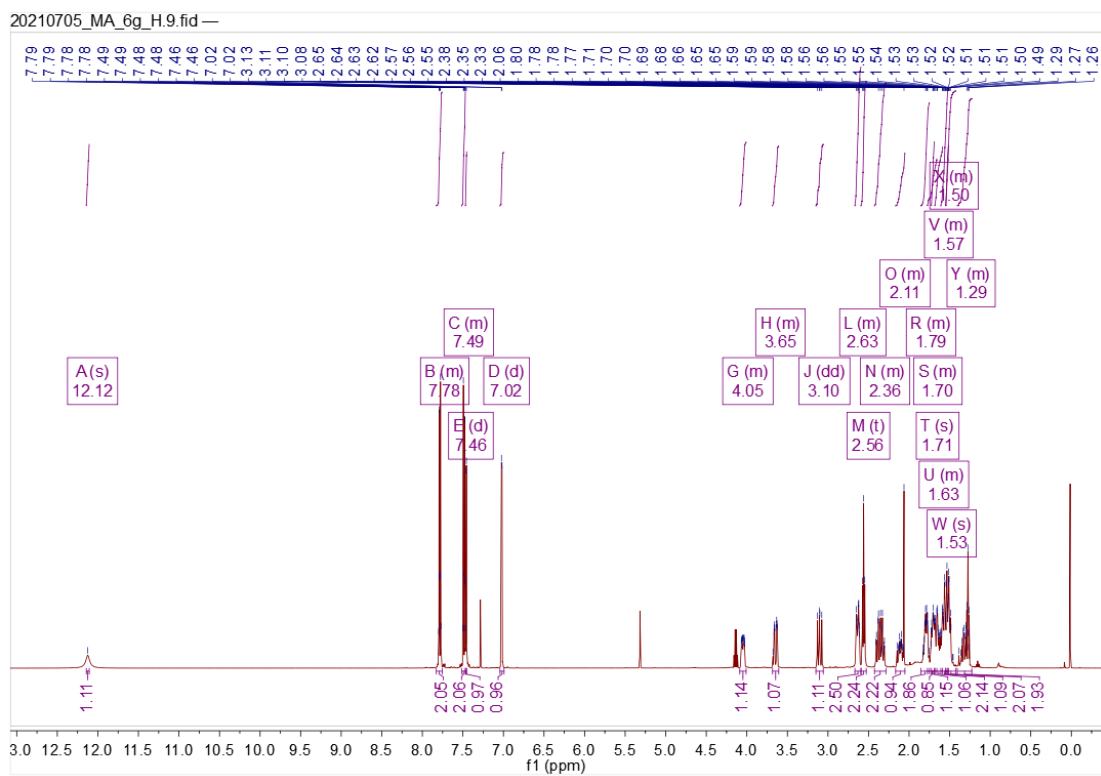

**Figure S136.**  $^1\text{H}$  NMR spectrum (Chloroform- $d$ , 500 MHz) of **6f**.

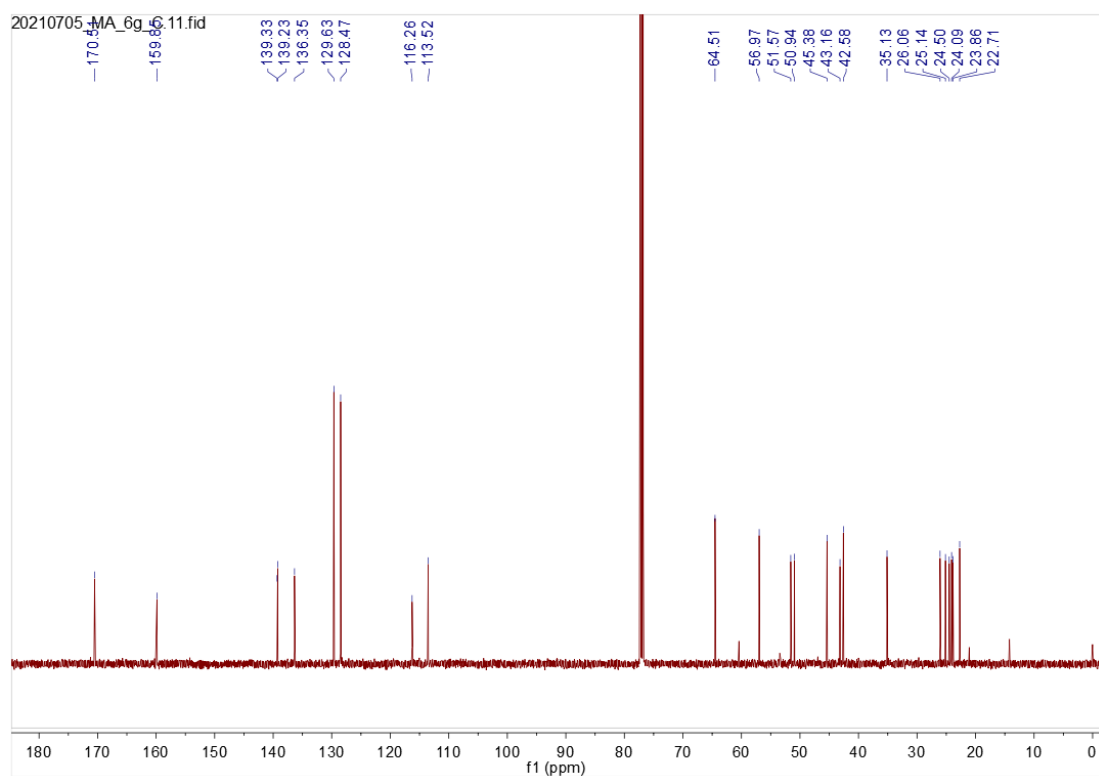

**Figure S137.**  $^{13}\text{C}$  NMR spectrum (Chloroform- $d$ , 126 MHz) of **6f**.

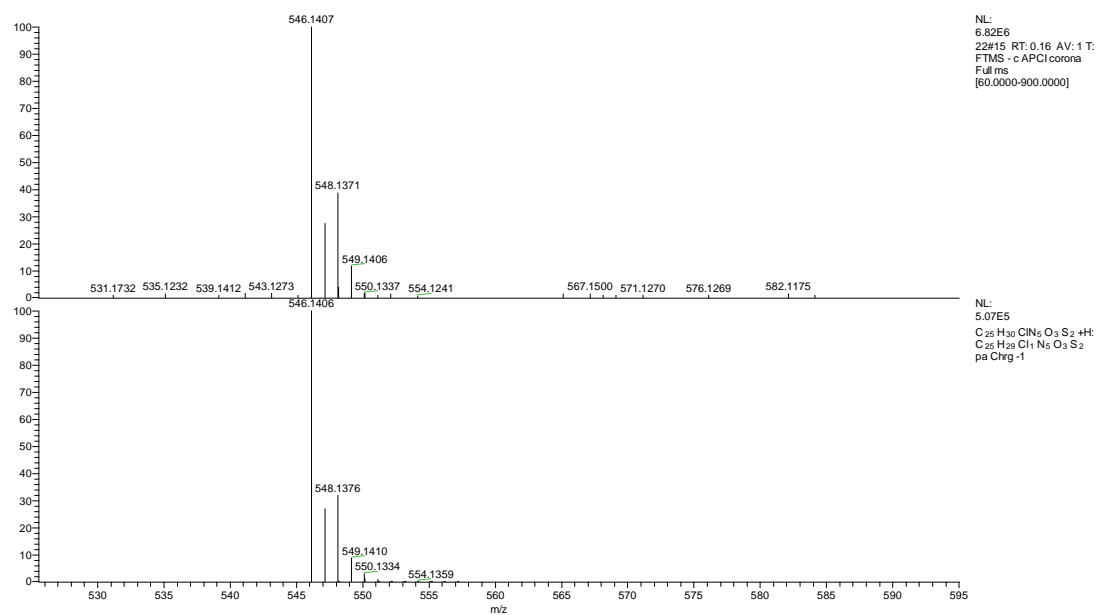

**Figure S138.** HRMS spectrum of **6f**.

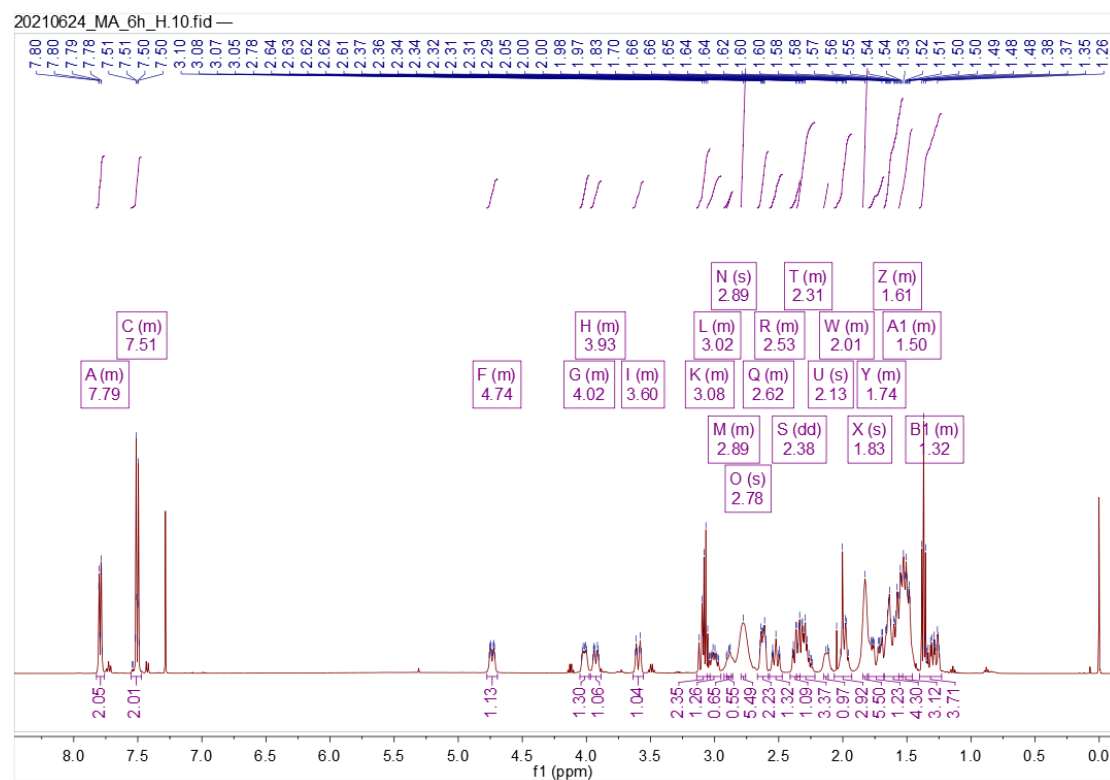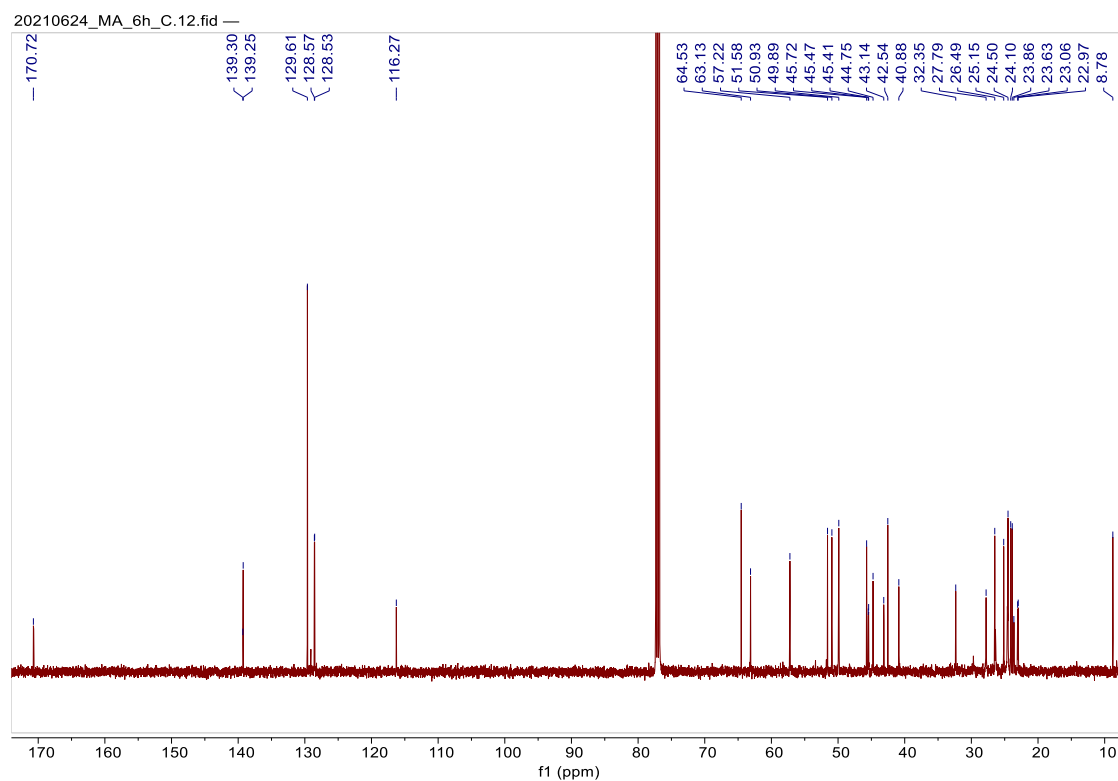

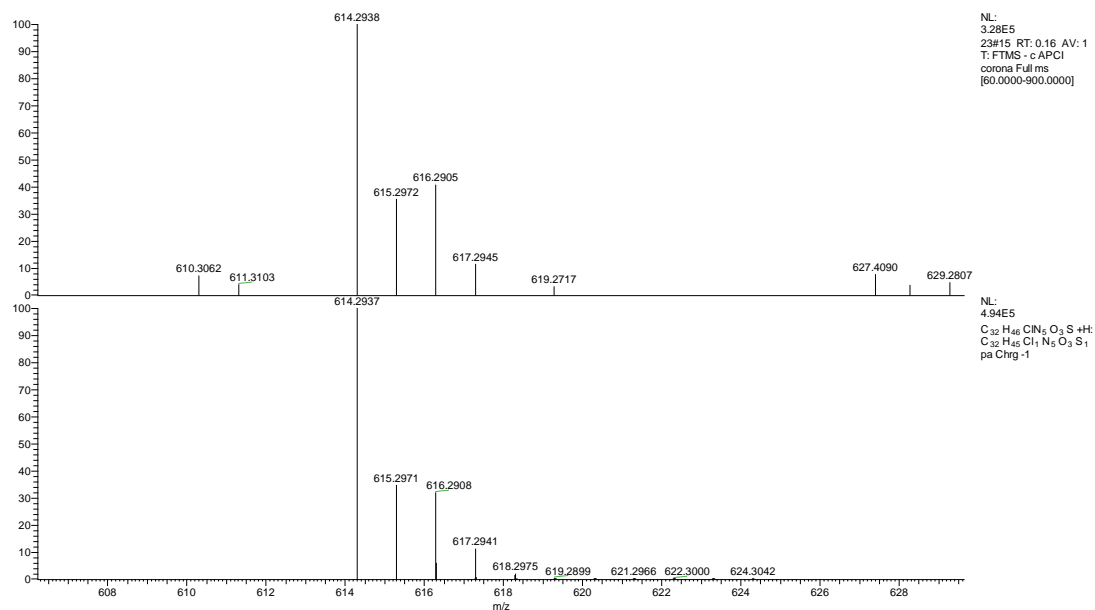

**Figure S141.** HRMS spectrum of **6g**.

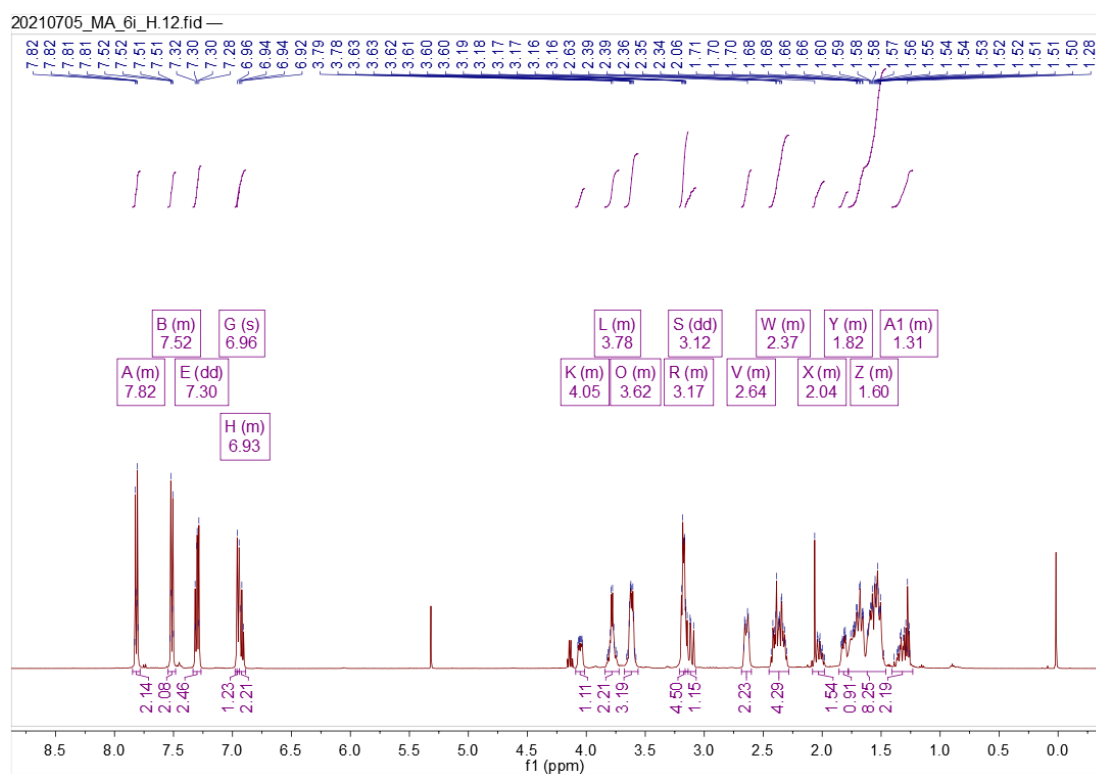

**Figure S142.** <sup>1</sup>H NMR spectrum (Chloroform-*d*, 500 MHz) of **6h**.

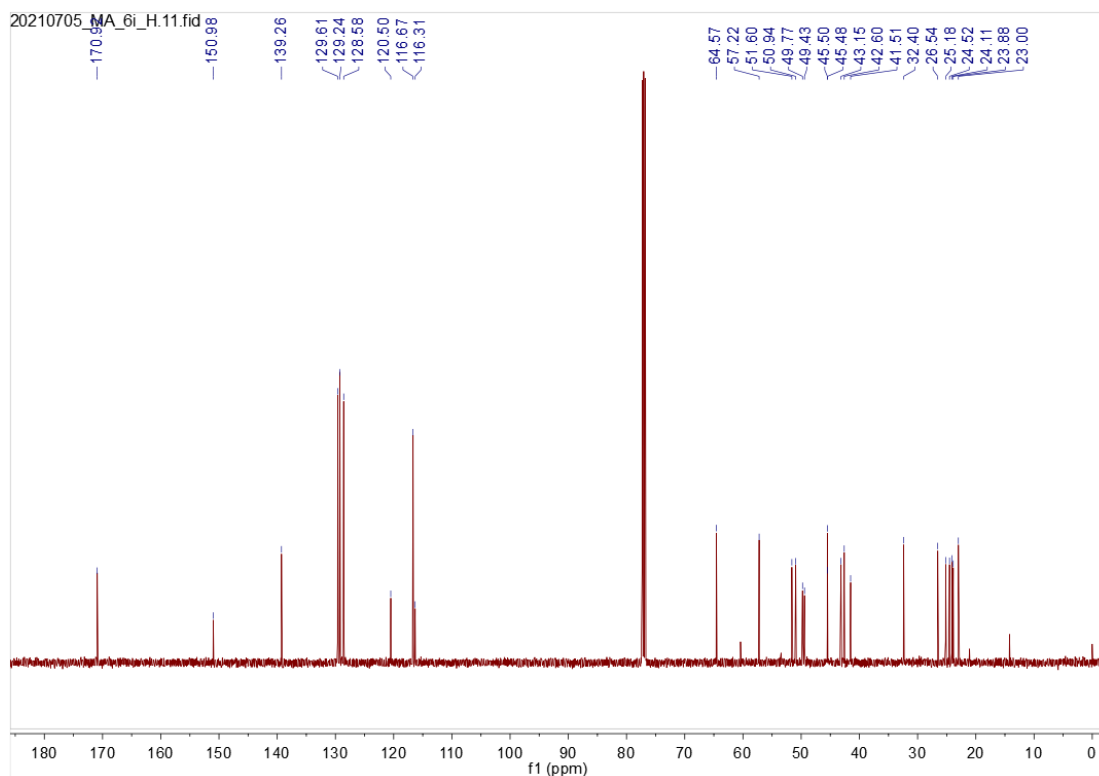

**Figure S143.**  $^{13}\text{C}$  NMR spectrum (Chloroform- $d$ , 126 MHz) of **6h**.

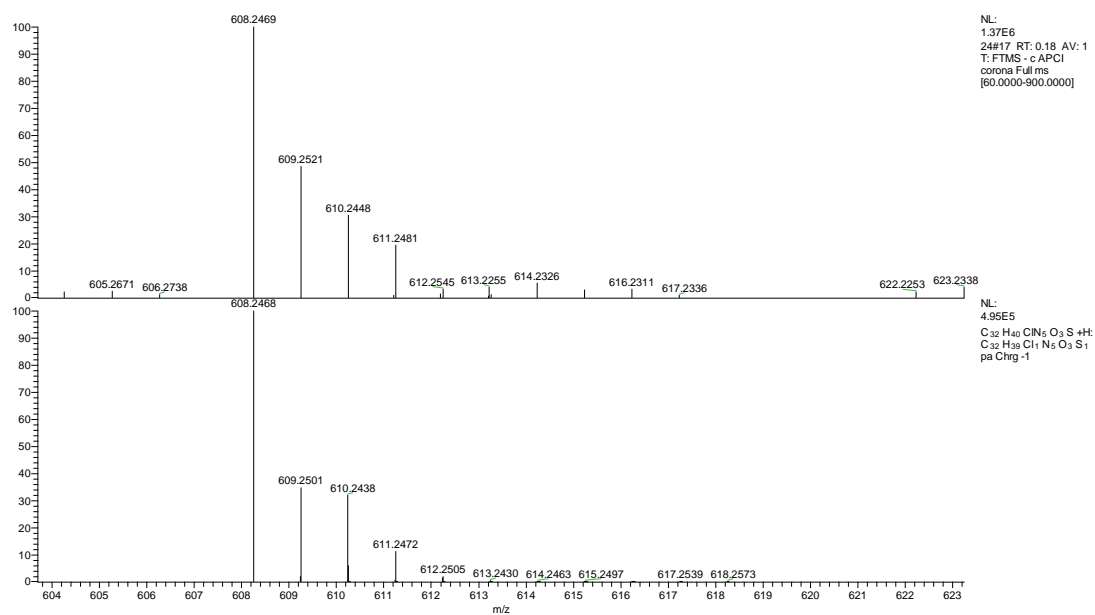

**Figure S144.** HRMS spectrum of **6h**.

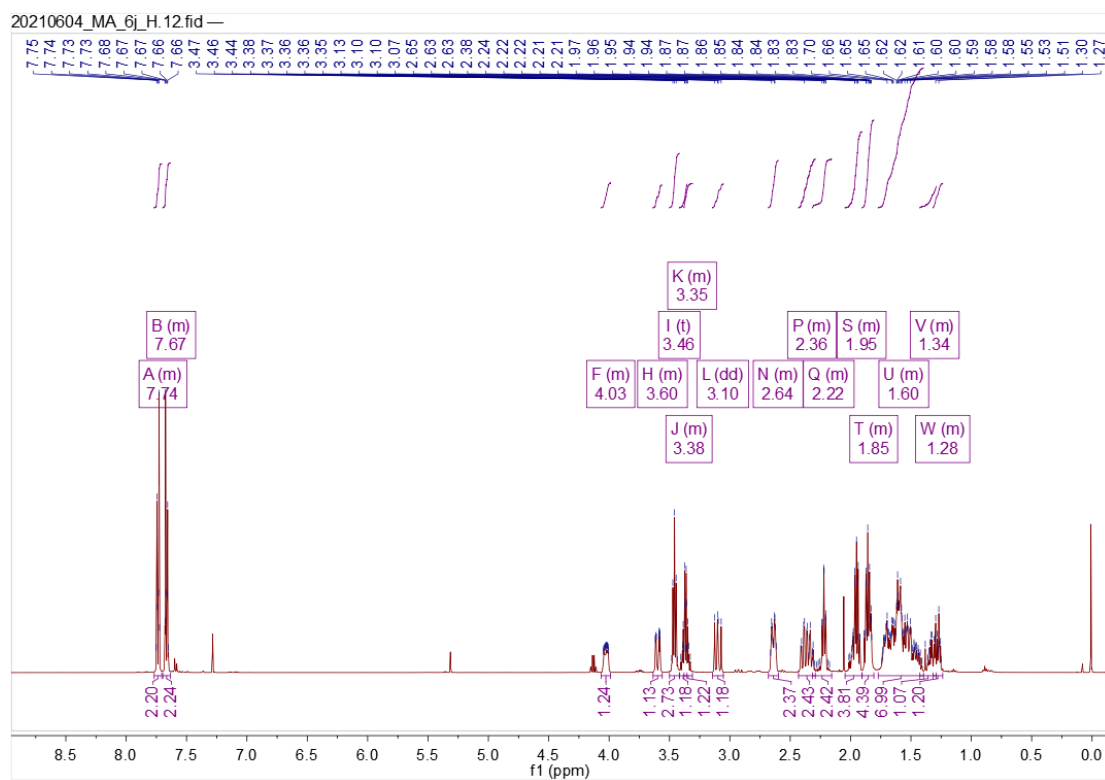

**Figure S145.**  $^1\text{H}$  NMR spectrum (Chloroform- $d$ , 500 MHz) of **6i**.

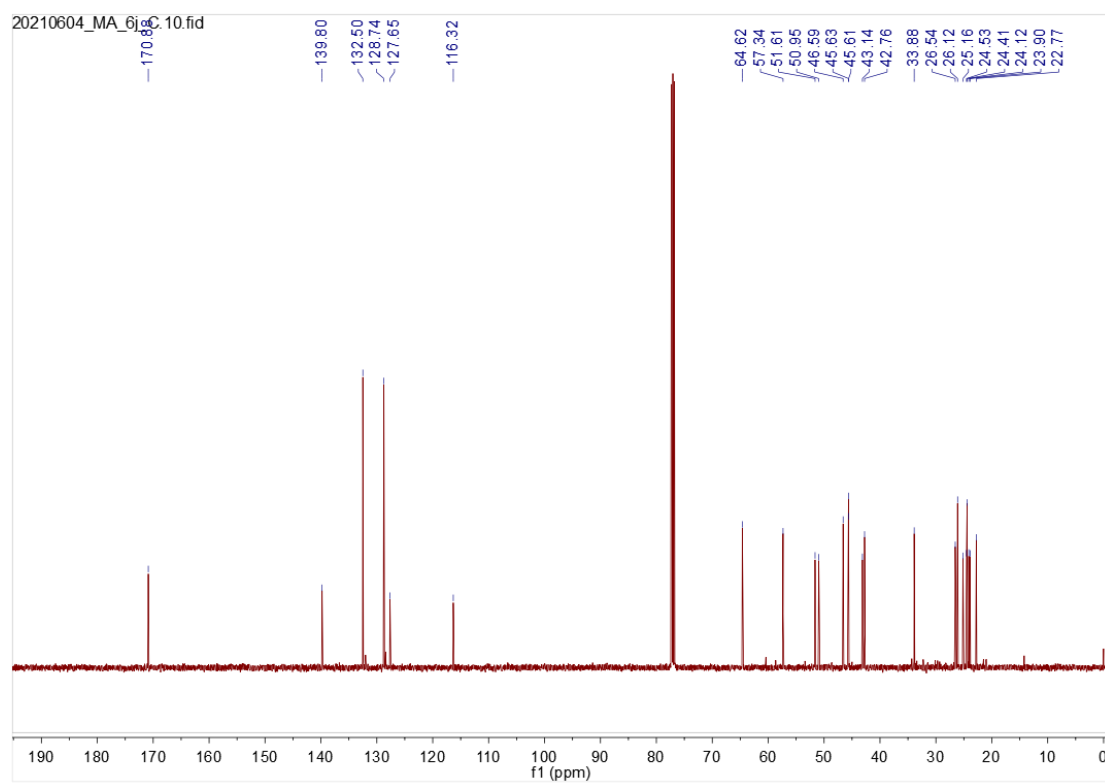

**Figure S146.**  $^{13}\text{C}$  NMR spectrum (Chloroform- $d$ , 126 MHz) of **6i**.



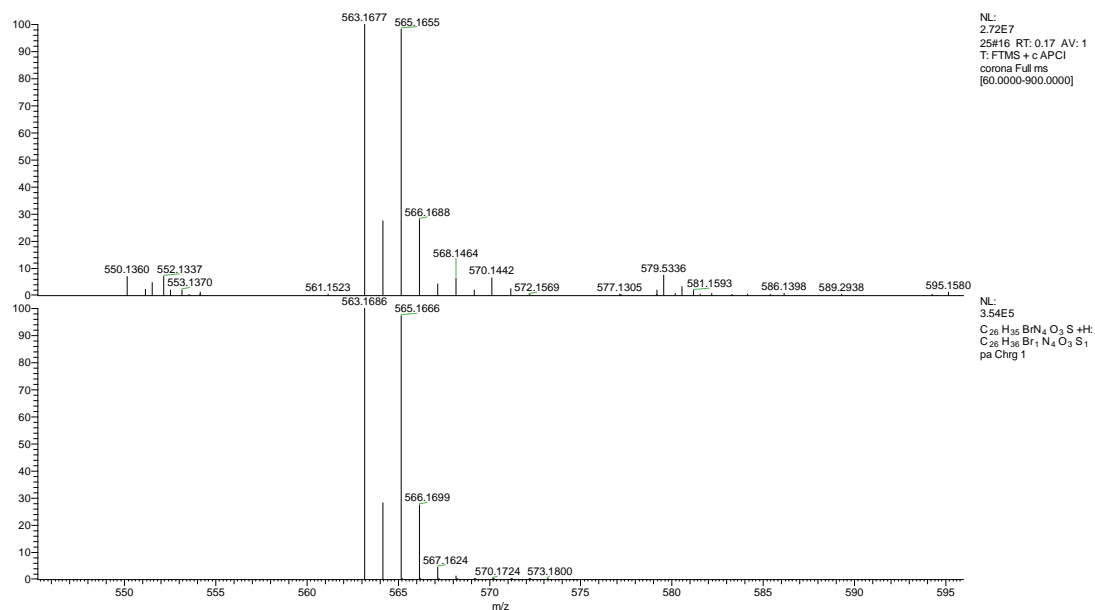

**Figure S147.** HRMS spectrum of **6i**.

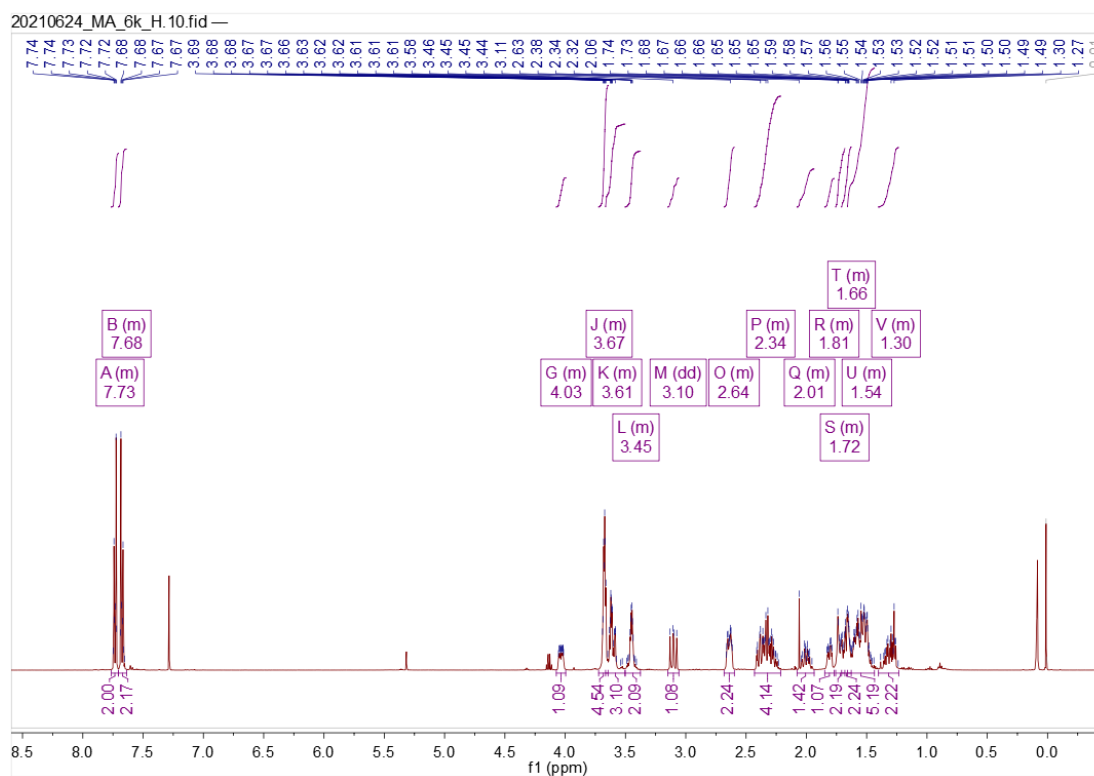

**Figure S148.** <sup>1</sup>H NMR spectrum (Chloroform-*d*, 500 MHz) of **6j**.

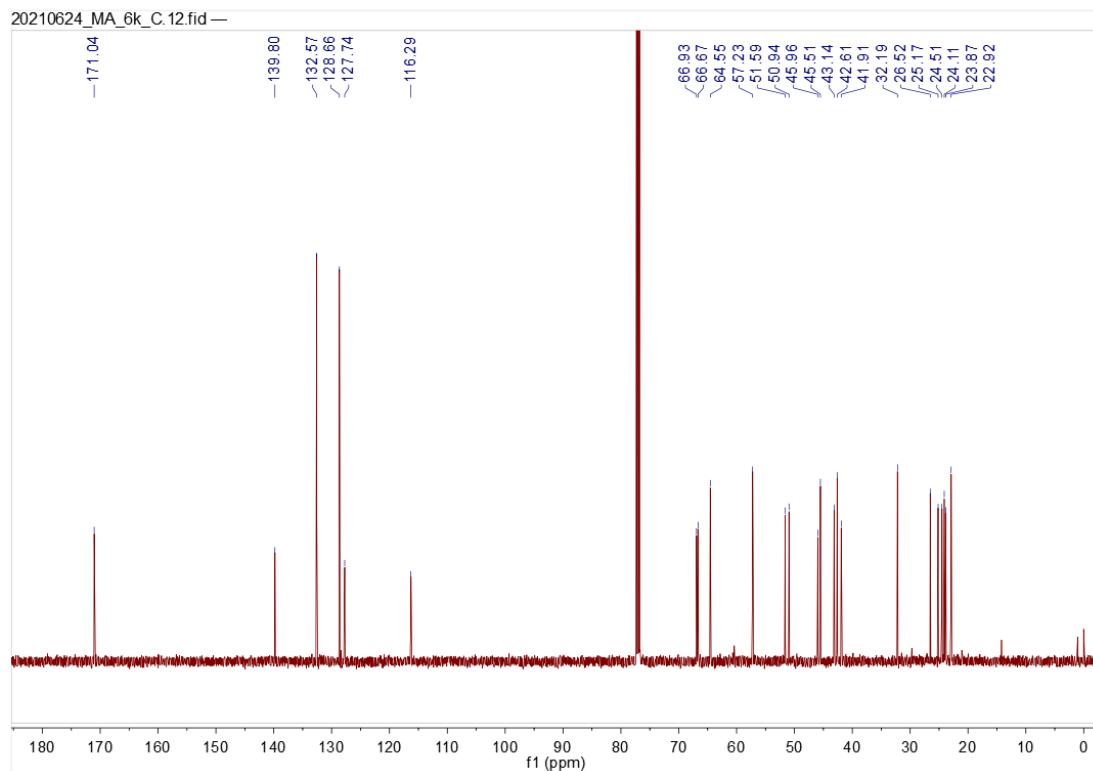

**Figure S149.**  $^{13}\text{C}$  NMR spectrum (Chloroform- $d$ , 126 MHz) of **6j**.

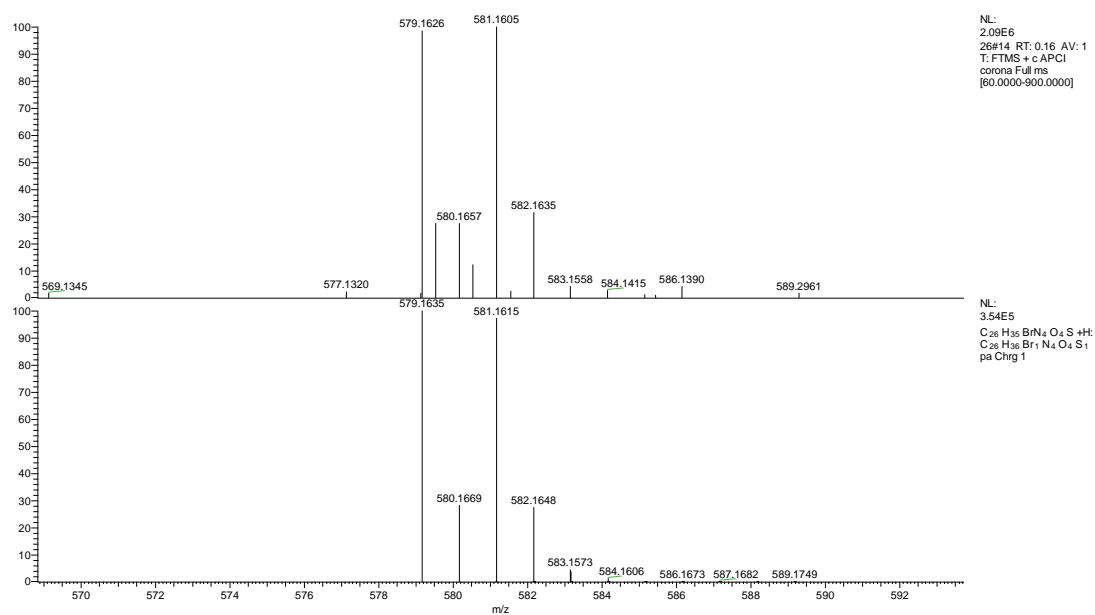

**Figure S150.** HRMS spectrum of **6j**.

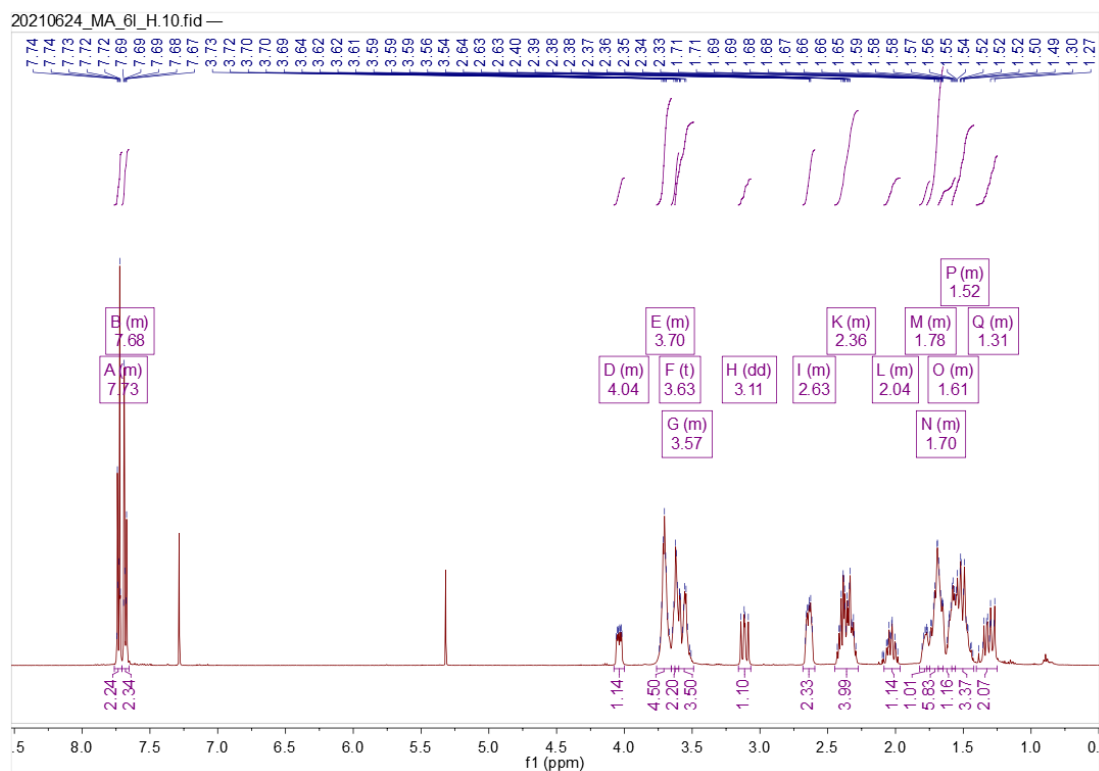

**Figure S151.**  $^1\text{H}$  NMR spectrum (Chloroform-*d*, 500 MHz) of **6k**.

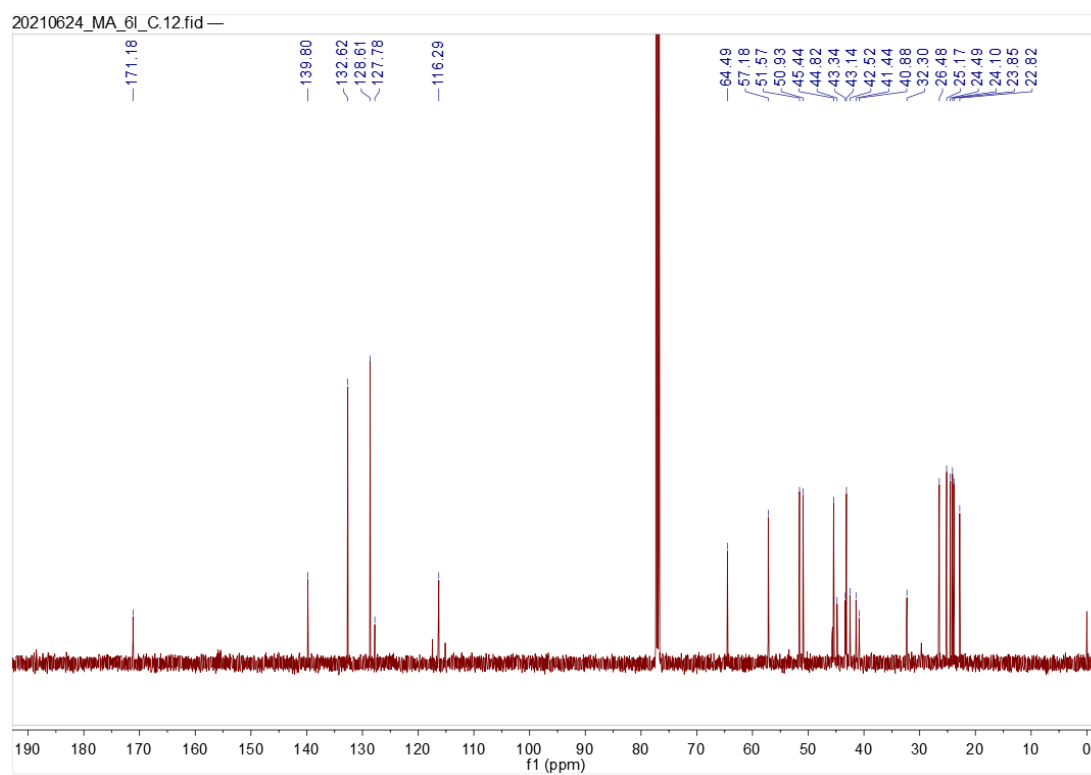

**Figure S152.**  $^{13}\text{C}$  NMR spectrum (Chloroform-*d*, 126 MHz) of **6k**.

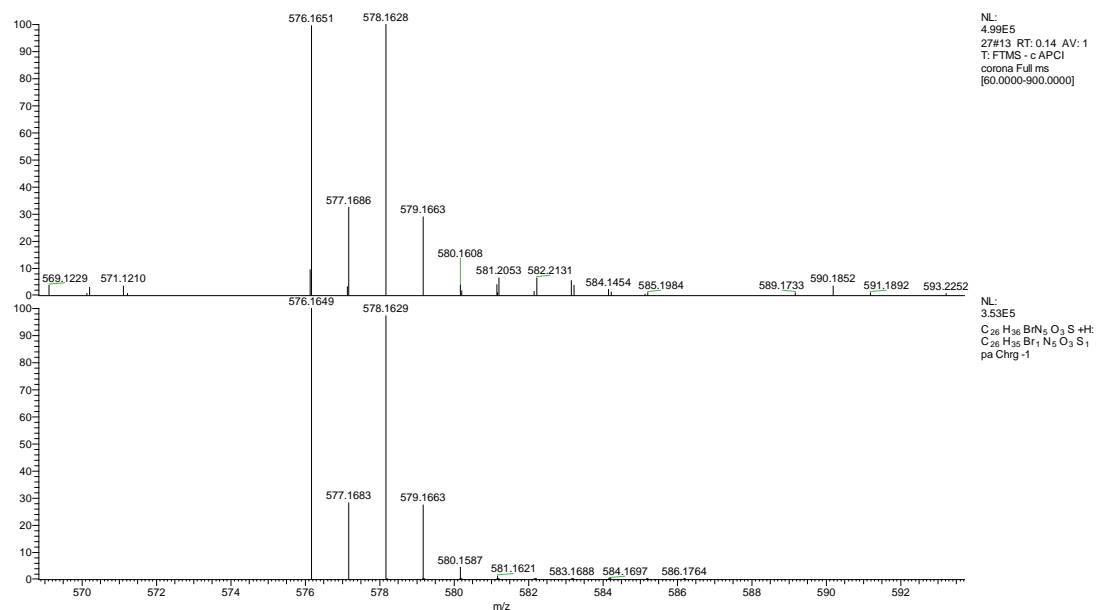

**Figure S153.** HRMS spectrum of **6k**.

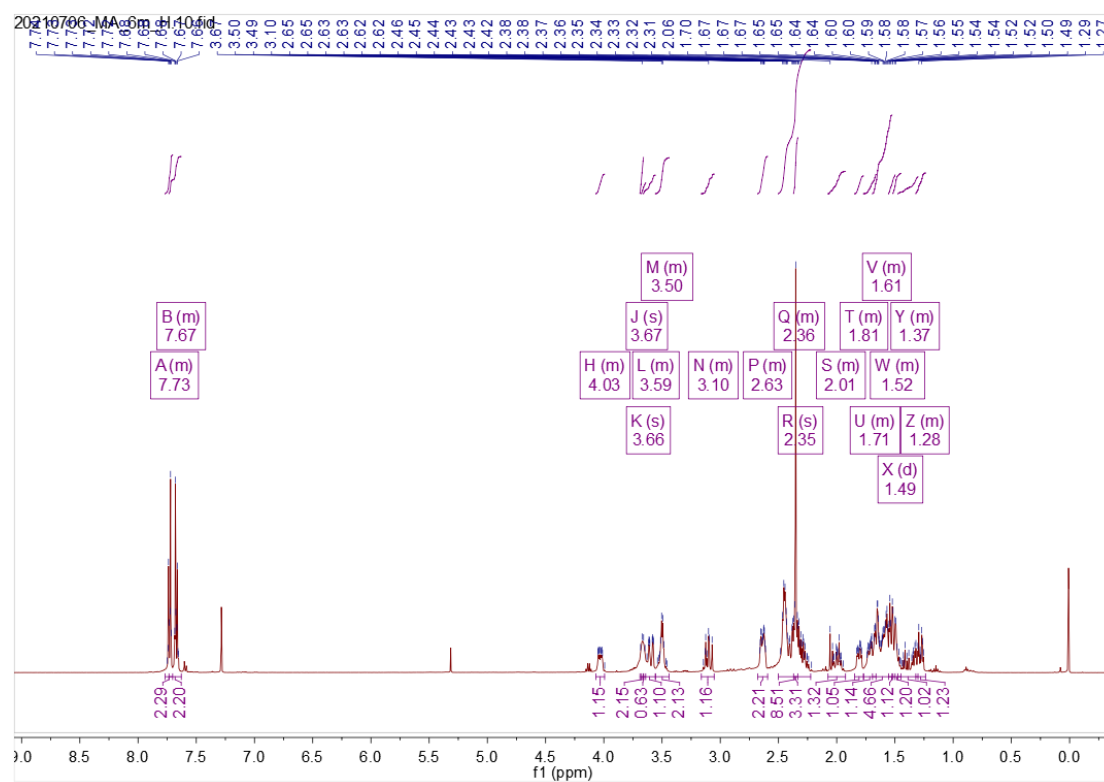

**Figure S154.** <sup>1</sup>H NMR spectrum (Chloroform-*d*, 500 MHz) of **6l**.

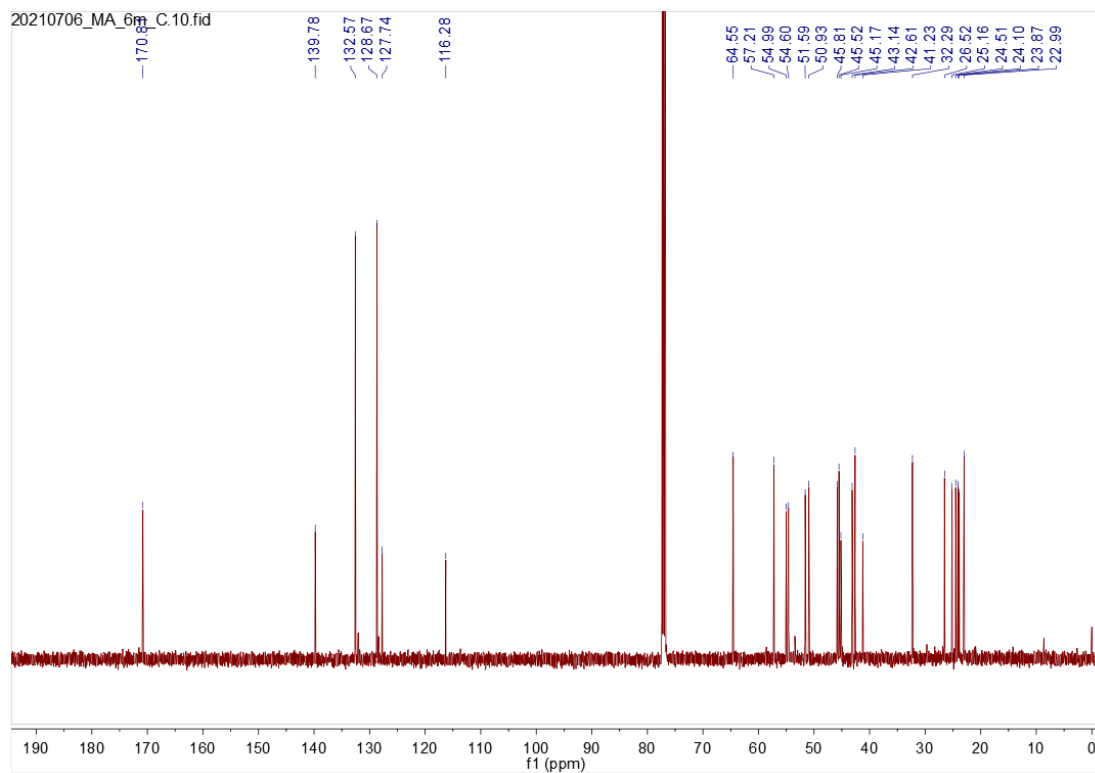

**Figure S155.**  $^{13}\text{C}$  NMR spectrum (Chloroform- $d$ , 126 MHz) of **6l**.

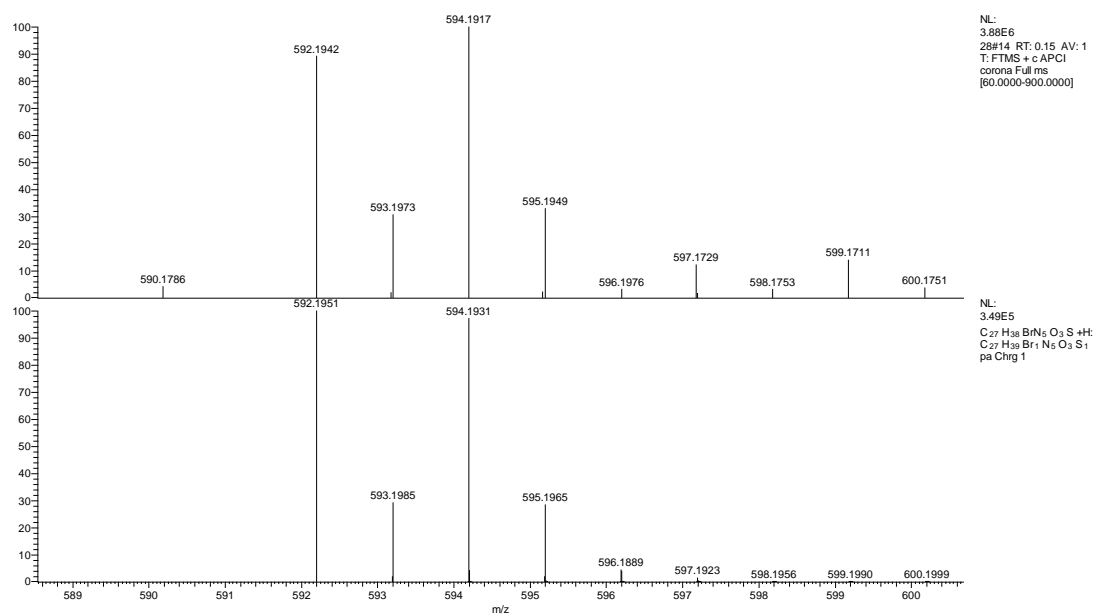

**Figure S156.** HRMS spectrum of **6l**.

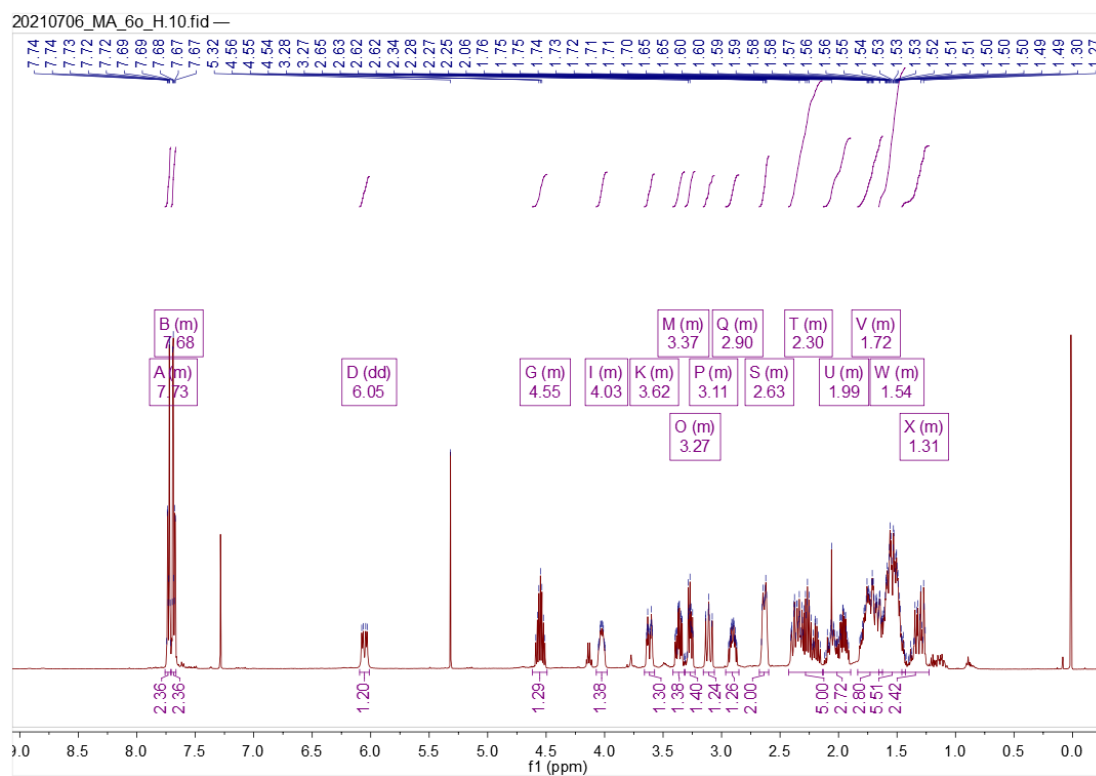

**Figure S157.**  $^1\text{H}$  NMR spectrum (Chloroform- $d$ , 500 MHz) of **6m**.

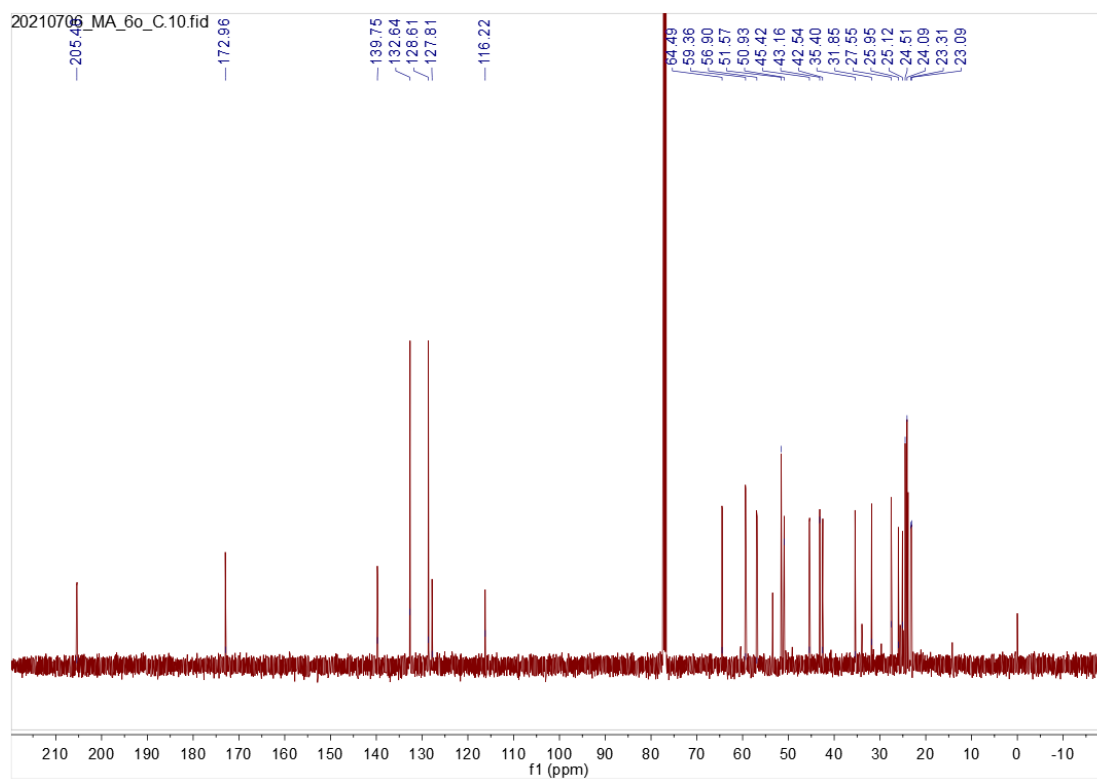

**Figure S158.**  $^{13}\text{C}$  NMR spectrum (Chloroform- $d$ , 126 MHz) of **6m**.

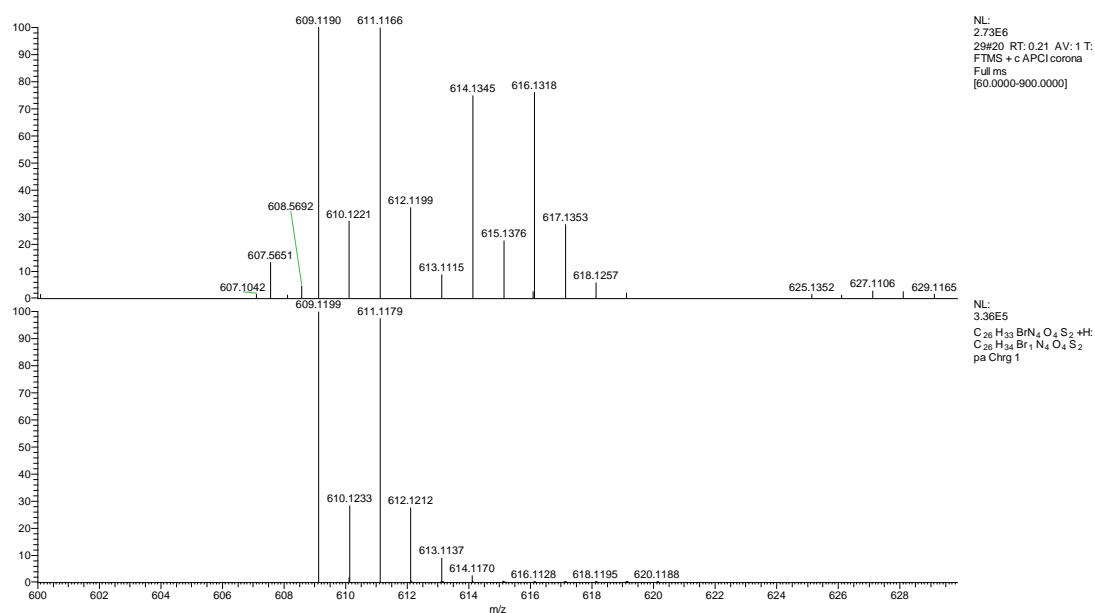

**Figure S159.** HRMS spectrum of **6m**.

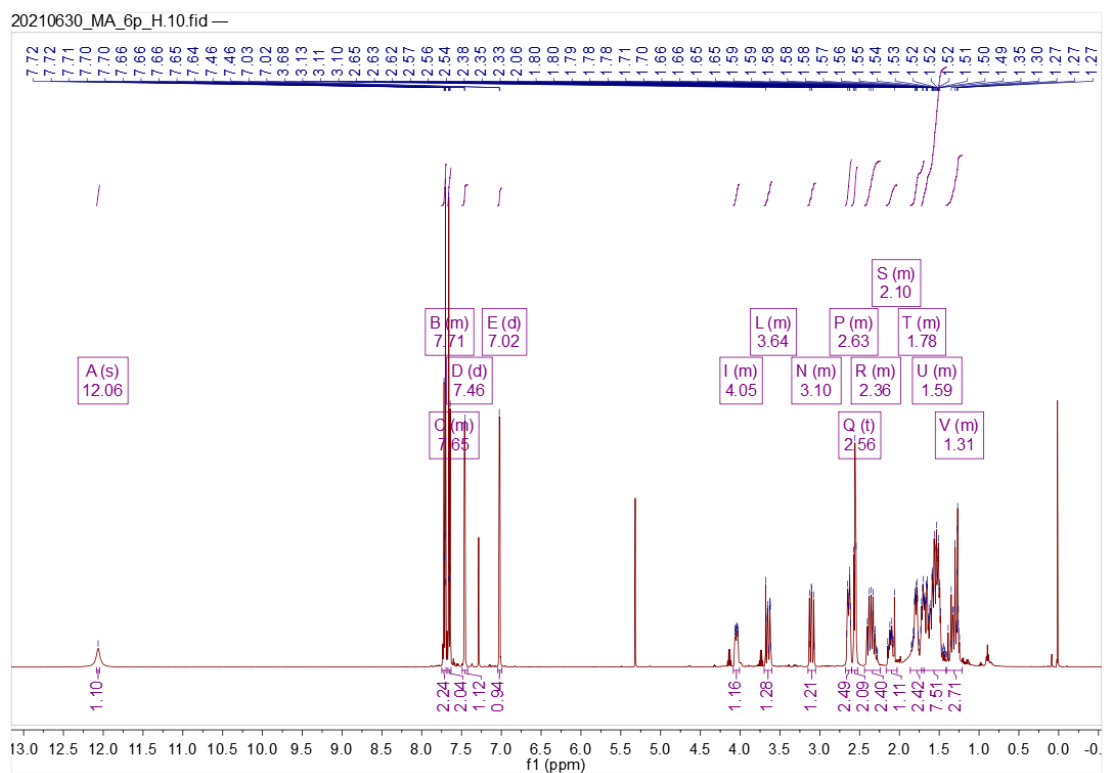

**Figure S160.** <sup>1</sup>H NMR spectrum (Chloroform-*d*, 500 MHz) of **6n**.

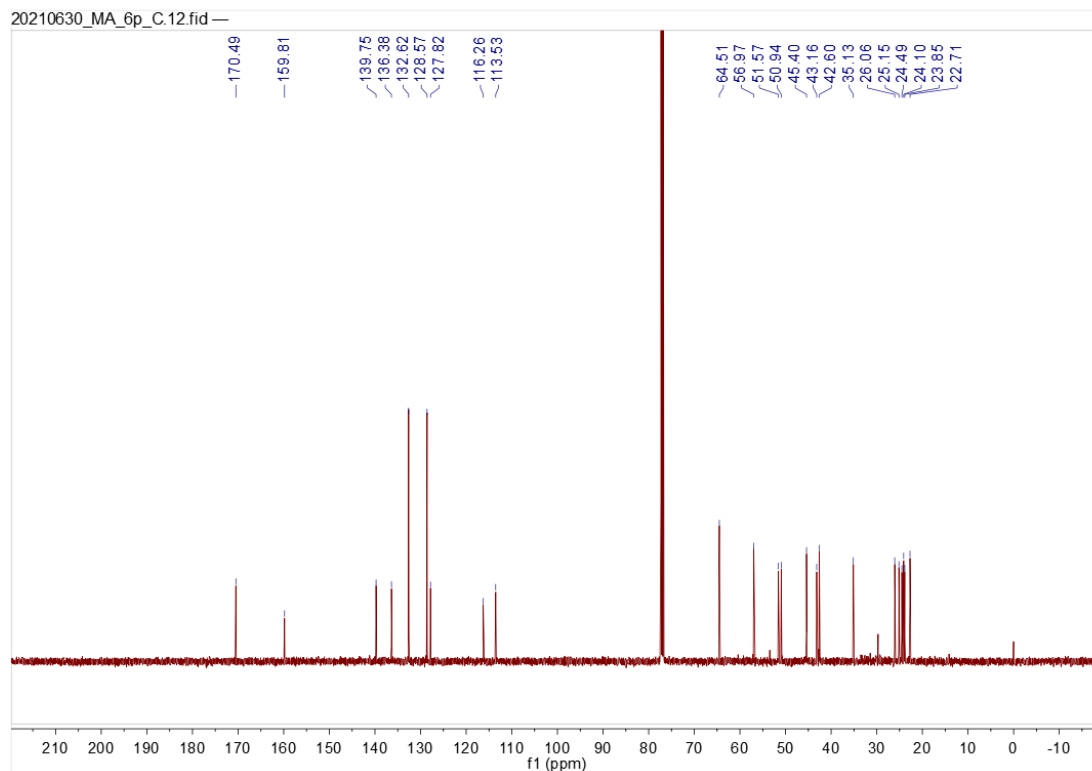

**Figure S161.**  $^{13}\text{C}$  NMR spectrum (Chloroform- $d$ , 126 MHz) of **6n**.

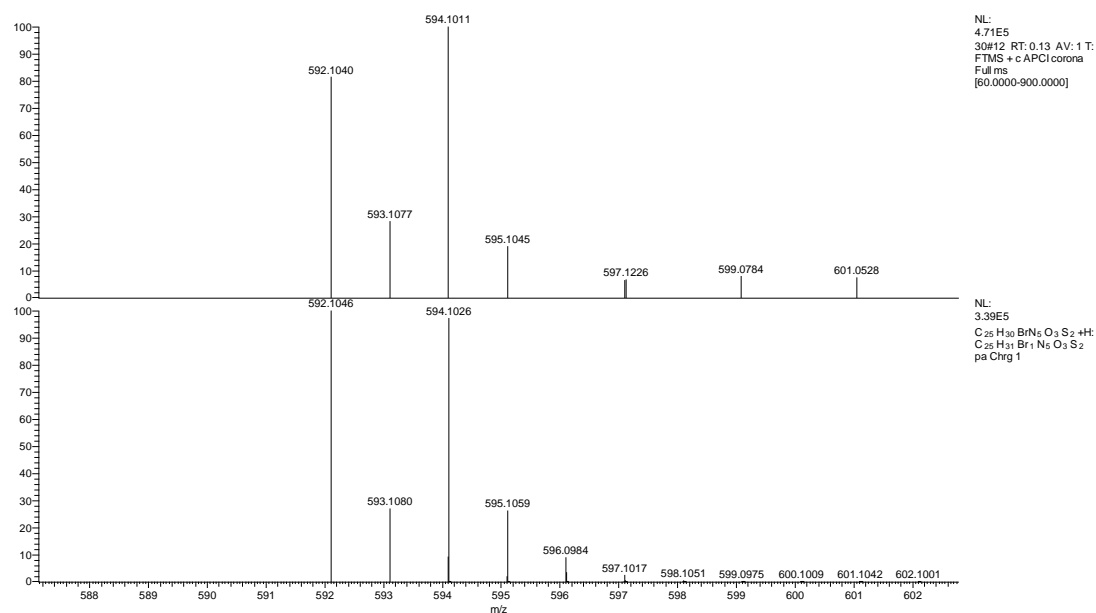

**Figure S162.** HRMS spectrum of **6n**.



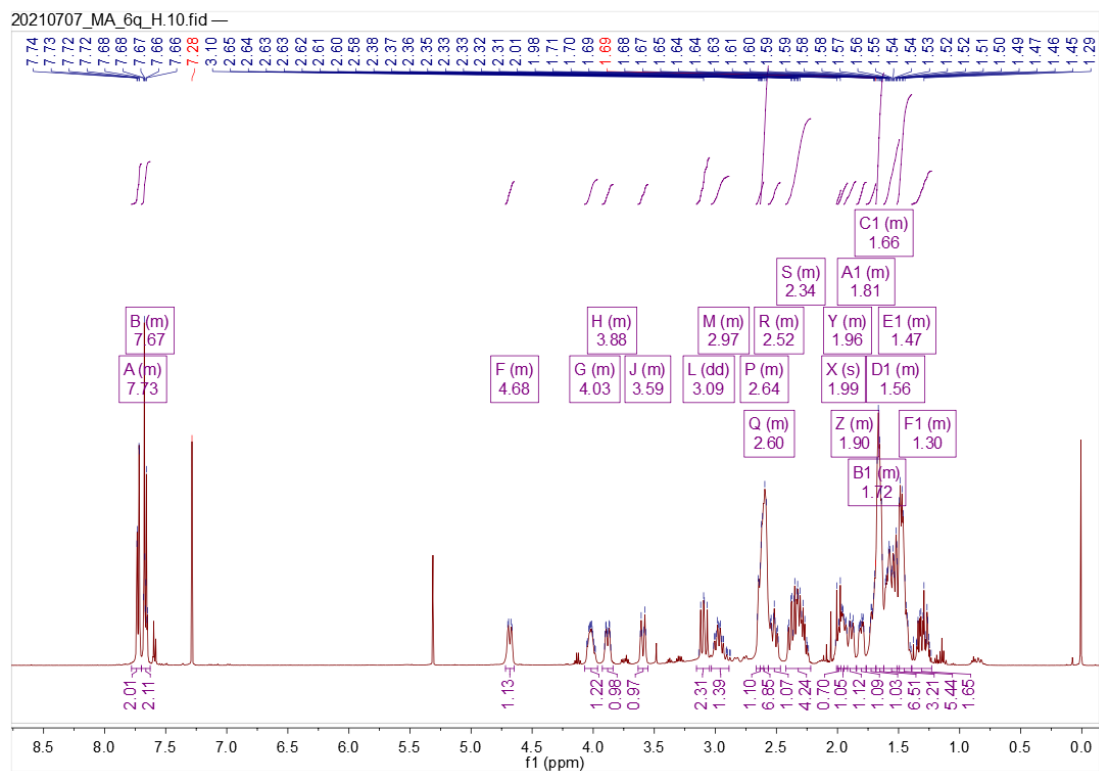

**Figure S163.**  $^1\text{H}$  NMR spectrum (Chloroform- $d$ , 500 MHz) of **60**.

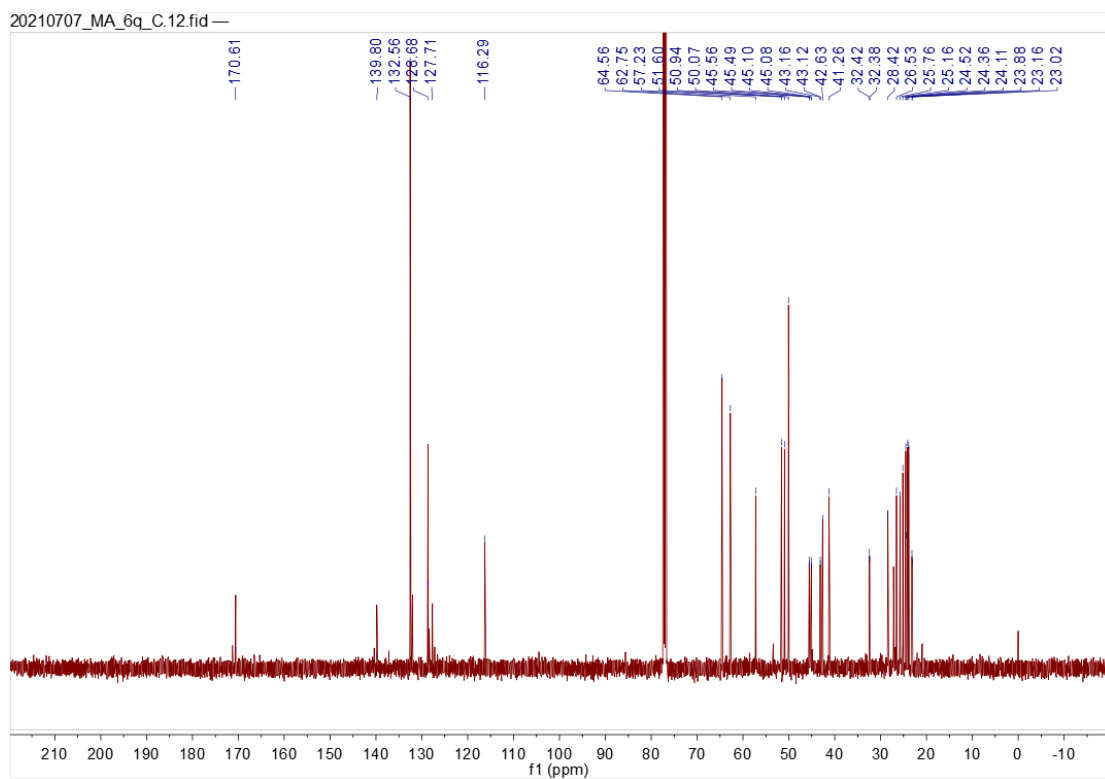

**Figure S164.**  $^{13}\text{C}$  NMR spectrum (Chloroform- $d$ , 126 MHz) of **60**.

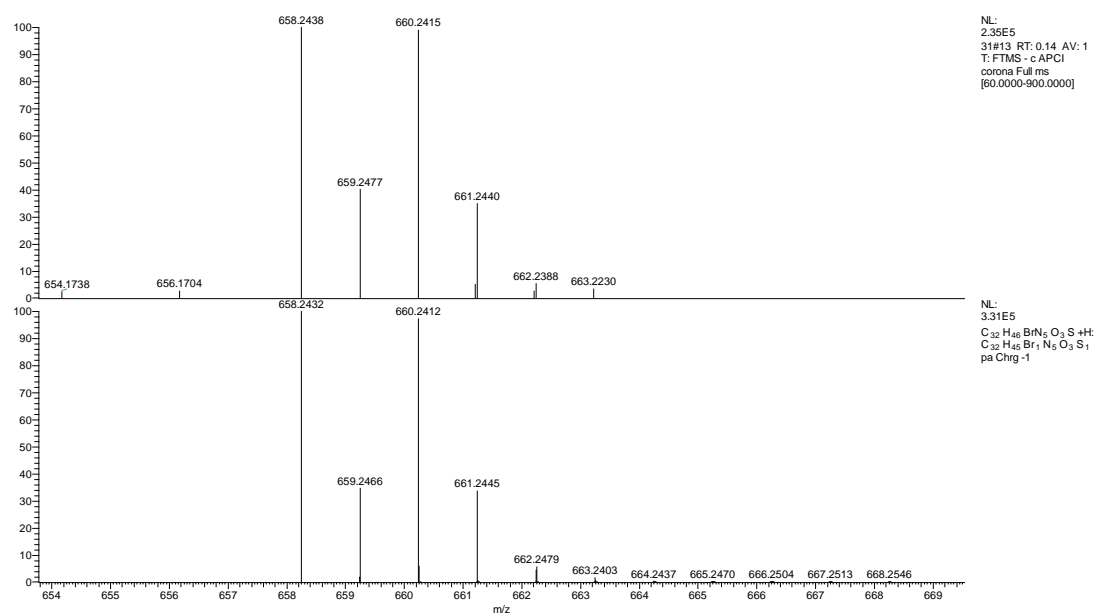

**Figure S165.** HRMS spectrum of **60**.

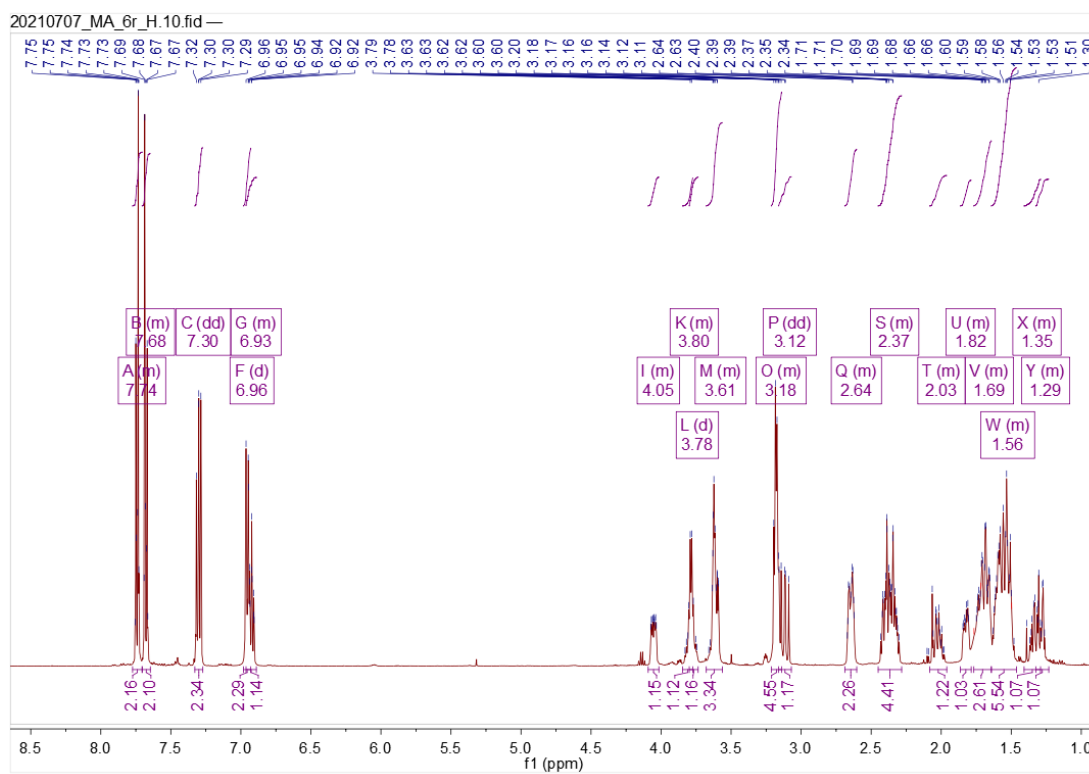

**Figure S166.**  $^1\text{H}$  NMR spectrum (Chloroform- $d$ , 500 MHz) of **6p**.

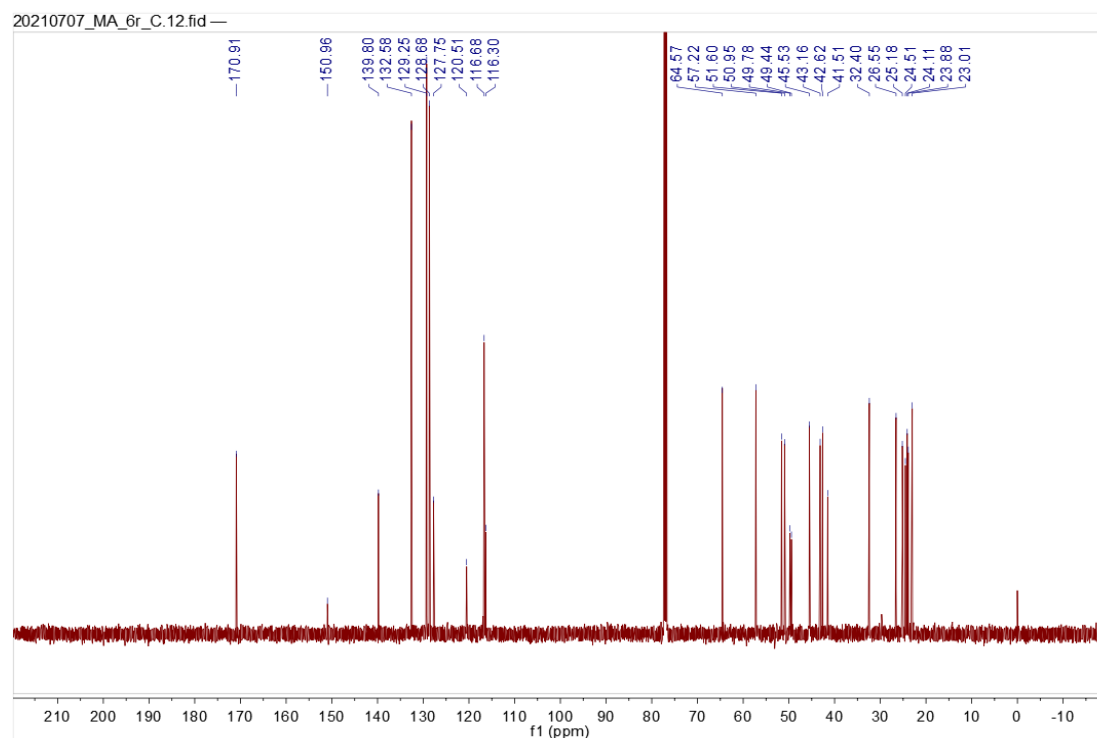

**Figure S167.**  $^{13}\text{C}$  NMR spectrum (Chloroform- $d$ , 126 MHz) of **6p**.

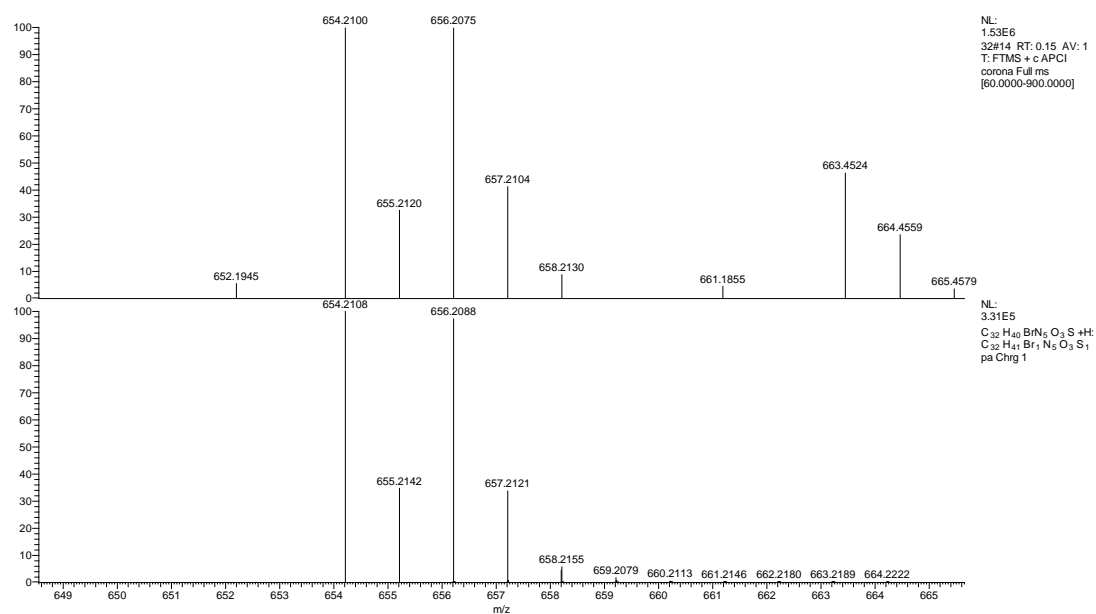

**Figure S168.** HRMS spectrum of **6p**.
